# Supplementary material
Source: PubMed Central journal article supplement (PMC3222144)
Supplement: NIHMS241123-supplement-3_si_003.pdf [file NIHMS241123-supplement-3_si_003.pdf]

**Catalytic Asymmetric Synthesis of Pyrroloindolines by a Formal [3+2]  
Cycloaddition Reaction**

Lindsay M. Repka, Jane Ni, Sarah E. Reisman\*

*The Arnold and Mabel Beckman Laboratories of Chemical Synthesis, Division of Chemistry and  
Chemical Engineering, California Institute of Technology, Pasadena, California 91125  
reisman@caltech.edu*

**Supporting Information 1 (Experimental Procedures):**

## Table of Contents

|                                                                    |     |
|--------------------------------------------------------------------|-----|
| 1. General considerations                                          | S3  |
| 2. Procedures for substrate synthesis                              | S4  |
| 3. Procedure for formal [3+2] cycloaddition                        | S8  |
| 4. SFC/HPLC traces of racemic and enantioenriched pyrroloindolines | S27 |
| 5. Epimerization studies                                           | S44 |
| 6. Resubjection of pyrroloindolines to reaction conditions         | S46 |

**General.** Unless otherwise stated, reactions were performed under a nitrogen atmosphere using freshly dried solvents. Tetrahydrofuran (THF), methylene chloride (CH<sub>2</sub>Cl<sub>2</sub>), and toluene were dried by passing through activated alumina columns. Deuterated methylene chloride (CD<sub>2</sub>Cl<sub>2</sub>) for the experiments resubjecting the pyrroloindoline products to reaction conditions was dried by passing through a plug of activated alumina. Dimethylformamide (DMF) was dried over activated molecular sieves, dichloroethane (DCE) was distilled over calcium hydride. All other commercially obtained reagents were used as received unless specifically indicated. All reactions were monitored by thin-layer chromatography using EMD/Merck silica gel 60 F254 pre-coated plates (0.25 mm). Flash column chromatography was performed either as described by Still et al. (Still, W. C., Kahn, M.; Mitra, A. *J. Org. Chem.* **1978**, *43*, 2923-2925.) using silica gel (partical size 0.032-0.063) purchased from Silicycle or using pre-packaged RediSep<sup>®</sup>Rf columns on a CombiFlash Rf system (Teledyne ISCO Inc.). Diastereomeric ratios were determined by integration of NMR spectra or HPLC or SFC analysis. Optical rotations were measured on a Jasco P-2000 polarimeter using a 100 mm path-length cell at 589 nm. <sup>1</sup>H and <sup>13</sup>C NMR spectra were recorded on a Varian Mercury 300 (at 300 MHz and 75 MHz respectively), a Varian 400 (at 400 MHz and 100 MHz respectively) or a Varian Inova 500 (at 500 MHz and 125 MHz respectively), and are reported relative to internal chloroform (<sup>1</sup>H, δ = 7.26, <sup>13</sup>C, δ = 77.0). Data for <sup>1</sup>H NMR spectra are reported as follows: chemical shift (δ ppm) (multiplicity, coupling constant (Hz), integration). Multiplicity and qualifier abbreviations are as follows: s = singlet, d = doublet, t = triplet, q = quartet, m = multiplet, br = broad, app = apparent. IR spectra were recorded on a Perkin Elmer Paragon 1000 spectrometer and are reported in frequency of absorption (cm<sup>-1</sup>). Preparatory HPLC was performed with either an Agilent 1100 or 1200 Series HPLC utilizing an Agilent Zorbax RX-SIL 5μm column (9.4 x 250 mm). Analytical chiral HPLC was performed with an Agilent 1100 Series HPLC utilizing Chiralcel AD or OD-H columns (4.6 mm x 25 cm) obtained from Daicel Chemical Industries, Ltd with visualization at 254 nm. Analytical SFC was performed with a Mettler SFC supercritical CO<sub>2</sub> analytical chromatography system with Chiralcel AD-H, OJ-H columns (4.6 mm x 25 cm). Melting points were determined using a Büchi B-545 capillary melting point apparatus and the values reported are uncorrected. HRMS were acquired using either an Agilent 6200 Series TOF with an Agilent G1978A Multimode source in electrospray ionization (ESI), atmospheric pressure chemical ionization (APCI) or mixed (MM) ionization mode, or obtained from the Caltech Mass Spectral Facility.

**Abbreviations used:** dppp: 1,3-Bis(diphenylphosphino)propane; dppf: 1,1'-Bis(diphenylphosphino)ferrocene; BINOL: 1,1'-Bi(2-naphthol); IPA: isopropanol; DBU: 1,8-Diazabicyclo[5.4.0]undec-7-ene; dba: dibenzylideneacetone.

### Comprehensive List of Citations for Pyrroloindoline Synthesis:

#### Substrate Synthesis.

#### General Procedure A. Amination-Heck cascade for synthesis of indole derivatives.

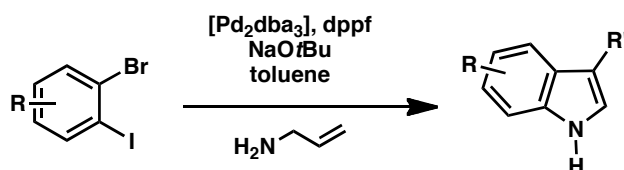

Procedure was adapted from Jørgensen *et al.*<sup>1</sup> To a 50 mL Schlenk tube was added [Pd<sub>2</sub>dba<sub>3</sub>], dppf, NaOtBu (20.8 mmol, 2.5 equiv) and toluene (10 mL). The mixture was stirred for 5 minutes, then the bromiodide (8.3 mmol, 1.0 equiv) and allylamine (8.3 mmol, 1.0 equiv) were added. The tube was sealed, heated to 140 °C over 30 minutes and stirred at 140 °C for 21 h. The reaction was then cooled to room temperature, diluted with 40 mL hexanes, filtered through a plug of celite, and concentrated under reduced pressure. The crude residue was purified by flash chromatography.

#### General Procedure B. N-methylation of indole derivatives.

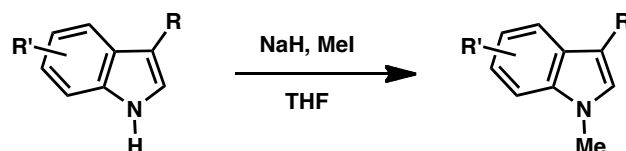

In a flame-dried flask, the indole (1.7 mmol, 1.0 equiv) was dissolved in 11 mL THF. Sodium hydride (60% w/w, 2.5 mmol, 1.5 equiv) was added in one portion, then methyl iodide (3.4 mmol, 2.0 equiv) was added dropwise. The reaction was stirred at room temperature until consumption of starting material was observed by TLC. The reaction was diluted with ethyl acetate and the excess NaH was quenched with water. The organic layer was separated, and the aqueous layer was extracted 3× with ethyl acetate. The combined organic layers were washed with brine, dried (MgSO<sub>4</sub>), filtered and concentrated under reduced pressure. The crude residue was purified by flash chromatography.

<sup>1</sup> Jensen, T.; Pedersen, H.; Bang-Andersen, B.; Madsen, R.; Jørgensen, M. *Angew. Chem. Int. Ed.* **2008**, *47*, 888.

### 5-Fluoro-3-methyl-1*H*-indole.

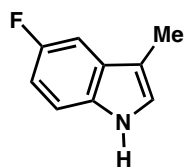

Prepared from 3.75 mmol of 2-bromo-4-fluoro-1-iodobenzene, 0.63 mol % [Pd<sub>2</sub>dba<sub>3</sub>] and 2.5 mol % dppf using general procedure A. The product was purified by flash chromatography (10% ethyl acetate/hexanes) to yield 5-fluoro-3-methyl-1*H*-indole (0.22 g, 38% yield). Spectral data matches that reported in the literature<sup>1</sup>.

### 5-Fluoro-1,3-dimethyl-1*H*-indole **12b**.

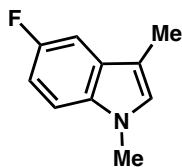

Prepared from 1.07 mmol of 5-fluoro-3-methyl-1*H*-indole using general procedure B. The product was purified by flash chromatography (3% ethyl acetate/hexanes) to yield **12b** (0.97 g, 55% yield) as a pale yellow oil. <sup>1</sup>H NMR (500 MHz, CDCl<sub>3</sub>) δ 7.23 – 7.13 (m, 2H), 7.00 – 6.92 (m, 1H), 6.86 (s, 1H), 3.72 (s, 3H), 2.29 (s, 3H); <sup>13</sup>C NMR (125 MHz, CDCl<sub>3</sub>) δ 153.6, 132.4, 128.8, 127.2, 111.6, 109.8, 109.5, 100.8, 32.6, 9.6. IR (NaCl/thin film): 2918, 1581, 1493, 1457, 1423, 1225, 1062, 786 cm<sup>-1</sup>; HRMS (MM: ESI–APCI) calc'd for [M+H]<sup>+</sup> 164.0870, found 164.0873.

### 3,5-dimethyl-1*H*-indole.

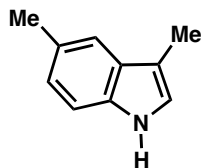

Prepared from 2.88 mmol of 2-bromo-1-iodo-4-methylbenzene<sup>2</sup>, 2.5 mol % [Pd<sub>2</sub>dba<sub>3</sub>] and 10 mol % dppf using general procedure A. The product was purified by flash chromatography (5→13% ethyl acetate/hexanes) to yield 3,5-dimethyl-1*H*-indole (0.11 g, 14% yield). Spectral data matches that reported in the literature.<sup>1</sup>

### 1,3,5-trimethyl-1*H*-indole **12c**.

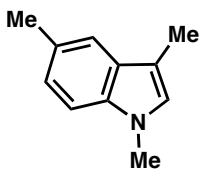

Prepared from 0.70 mmol of 3,5-dimethyl-1*H*-indole using general procedure B. The product was purified by flash chromatography (2% ethyl acetate/hexanes) to yield **12c** (0.048 g, 43% yield) as a colorless oil. <sup>1</sup>H NMR (300 MHz, CDCl<sub>3</sub>) δ 7.38 – 7.34 (m, 1H), 7.18 (d, *J* = 8.3 Hz, 1H), 7.05 (dd, *J* = 8.3, 1.4 Hz, 1H), 6.78 (s, 1H), 3.71 (s, 3H), 2.49 (s, 3H), 2.31 (s, 3H); <sup>13</sup>C NMR (125 MHz, CDCl<sub>3</sub>) δ 135.4, 128.8, 127.6, 126.6, 123.0, 118.6, 109.5, 108.7, 32.5, 21.5, 9.5. IR (NaCl/thin film): 2918, 1494, 1460, 1388, 1298, 1250, 1149, 1058, 885, 866, 784 cm<sup>-1</sup>; HRMS (MM: ESI–APCI) calc'd for [M+H]<sup>+</sup> 160.1121, found 160.1116.

<sup>2</sup> van Klink, G.P.M.; de Boer, H.J.R.; Schat, G.; Akkerman, O.S.; Bickelhaupt, F.; Spek, A.L. *Organometallics* **2002**, *21*, 2119.

### 5-Bromo-1,3-dimethyl-1*H*-indole **12d**.

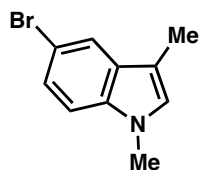

Prepared from 0.95 mmol of 5-bromo-3-methyl-1*H*-indole<sup>3</sup> using general procedure B.

The product was purified by flash chromatography (5% ethyl acetate/hexanes) to yield

**12d** (0.20 g, 90% yield) as a pale yellow oil. <sup>1</sup>H NMR (500 MHz, CDCl<sub>3</sub>) δ 7.70 (d, *J* = 1.5 Hz, 1H), 7.30 (dd, *J* = 8.6, 1.6 Hz, 1H), 7.14 (d, *J* = 8.6 Hz, 1H), 6.82 (s, 1H), 3.70

(s, 3H), 2.30 (s, 3H); <sup>13</sup>C NMR (125 MHz, CDCl<sub>3</sub>) δ 135.6, 130.3, 127.7, 124.1, 121.5, 111.9, 110.5, 109.7, 32.6, 9.4. IR (NaCl/thin film): 2918, 1563, 1479, 1422, 1279, 812, 785 cm<sup>-1</sup>; HRMS (APCI) calc'd for [M+H]<sup>+</sup> 224.0069, found 224.0070.

### *N*-allyl-2-bromo-5-methylaniline.

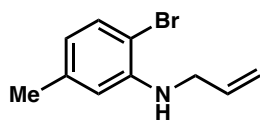

Procedure was adapted from Sørensen and Pombo-Villar.<sup>4</sup> To a solution of 2-

bromo-5-methylaniline (10.8 mmol, 1.0 equiv) in 29 mL THF at -78 °C was added

MeLi (2.9 M solution in dimethoxymethane, 11.8 mmol, 1.1 equiv), and stirred

for 30 minutes. Allyl bromide was added dropwise, followed by stirring at -78 °C for 10 minutes, then

at room temperature for 5 hours. Then saturated NaHCO<sub>3(aq)</sub> solution was added, and the aqueous layer

was extracted with ethyl acetate 3×. The combined organic layers were dried (MgSO<sub>4</sub>), filtered, and

concentrated under reduced pressure. The crude residue was purified by flash chromatography (0→10%

ethyl acetate/hexanes) to yield *N*-allyl-2-bromo-5-methylaniline (1.63 g, 67% yield) as a yellow oil. <sup>1</sup>H

NMR (400 MHz, CDCl<sub>3</sub>) δ 7.30 (d, *J* = 8.0 Hz, 1H), 6.46 (d, *J* = 1.5 Hz, 1H), 6.41 (ddd, *J* = 8.0, 2.0, 0.6

Hz, 1H), 5.97 (ddt, *J* = 17.2, 10.4, 5.2 Hz, 1H), 5.31 (ddd, *J* = 17.2, 3.3, 1.7 Hz, 1H), 5.21 (dq, *J* = 10.3,

1.5 Hz, 1H), 4.41 (s, 1H), 3.83 (s, 2H), 2.27 (s, 3H); <sup>13</sup>C NMR (100 MHz, CDCl<sub>3</sub>) δ 144.4, 138.4, 134.7,

132.0, 118.8, 116.3, 112.4, 106.5, 46.2, 21.5. IR (NaCl/thin film): 3411, 2920, 1596, 1506, 1416, 1016,

921, 787 cm<sup>-1</sup>. HRMS (MM: ESI-APCI) calc'd for [M+H]<sup>+</sup> 226.0226, found 226.0216.

### 3,6-dimethyl-1*H*-indole.

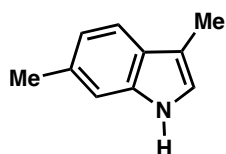

Procedure was adapted from Sørensen and Pombo-Villar.<sup>4</sup> A solution of *N*-allyl-2-

bromo-5-methylaniline (1.6 mmol, 1.0 equiv), Pd(OAc)<sub>2</sub> (0.16 mmol, 0.1 equiv),

dppp (0.16 mmol, 0.1 equiv), Bu<sub>4</sub>NCl (1.6 mmol, 1.0 equiv), and NaOAc (6.2 mmol,

4.0 equiv) in 24 mL DMF was heated to 120 °C in a flask equipped with a reflux condenser for 16h. The

reaction was cooled to room temperature, saturated NaHCO<sub>3(aq)</sub> solution and 100 mL water were added,

<sup>3</sup> Petit, S.; Duroc, Y.; Larue, V.; Giglione, Léon, C.; Soulama, C.; Denis, A.; Dardel, F. Meinel, T.; Artaud, I. *ChemMedChem* **2009**, *4*, 261.

<sup>4</sup> Sørensen, U.S.; Pombo-Villar, E. *Helv. Chim. Acta.* **2004**, *87*, 82.

and the aqueous layer was extracted with ethyl acetate 3×. The combined organic layers were dried (MgSO<sub>4</sub>), filtered, and concentrated under reduced pressure. The crude residue was purified by flash chromatography (5→10% ethyl acetate/hexanes) to yield 3,6-dimethyl-1*H*-indole (0.19 g, 85% yield) as a white powder. <sup>1</sup>H NMR (400 MHz, CDCl<sub>3</sub>) δ 7.71 (br s, 1H), 7.44 (d, *J* = 8.0 Hz, 1H), 7.13-7.11 (m, 1H), 6.94 (dd, *J* = 8.0 Hz, 1.0 Hz, 1H), 6.87 (dd, *J* = 2.1 Hz, 1.1 Hz, 1H), 2.45 (s, 3H), 2.30 (s, 3H); <sup>13</sup>C NMR (100 MHz, CDCl<sub>3</sub>) δ 136.7, 131.6, 126.2, 120.9, 120.8, 118.5, 111.6, 110.9, 21.7, 9.7. IR (NaCl/thin film): 3409, 2922, 1452, 1329, 1086, 908, 803. 733 cm<sup>-1</sup>. HRMS (MM: ESI-APCI) calc'd for [M+H]<sup>+</sup> 146.0964, found 146.0970.

### 1,3,6-trimethyl-1*H*-indole **12e**.

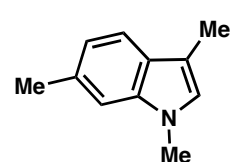

Prepared from 0.70 mmol of 3,6-dimethyl-1*H*-indole using general procedure B. The product was purified by flash chromatography (0→5% ethyl acetate/hexanes) to yield **12e** (62 mg, 56% yield) as a yellow oil. <sup>1</sup>H NMR (300 MHz, CDCl<sub>3</sub>) δ 7.45 (d, *J* = 8.0 Hz, 1H), 7.07 (s, 1H), 6.94 (dd, *J* = 8.0, 0.7 Hz, 1H), 6.75 (d, *J* = 0.9 Hz, 1H), 3.70 (s, 3H), 2.50 (s, 3H), 2.31 (s, 3H). <sup>13</sup>C NMR (100 MHz, CDCl<sub>3</sub>) δ 137.4, 131.1, 126.5, 125.8, 120.2, 118.6, 109.9, 109.0, 32.4, 21.9, 9.6. IR (NaCl/thin film): 3027, 2917, 2860, 1625, 1478, 1388, 1369, 1328, 1248, 799 cm<sup>-1</sup>; HRMS (MM: ESI-APCI) calc'd for [M+H]<sup>+</sup> 160.1121, found 160.1114.

### 1-methyl-3-*t*-butyldimethylsiloxyethyl-1*H*-indole **12f**.

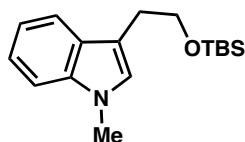

Prepared from 2.66 mmol of 3-*t*-butyldimethylsiloxyethyl-1*H*-indole<sup>5</sup> using general procedure B. The product was purified by flash chromatography (0→5% ethyl acetate/hexanes) to yield **12f** (0.67 g, 87% yield) as an orange oil. <sup>1</sup>H NMR (500 MHz, CDCl<sub>3</sub>) δ 7.63 (dt, *J* = 7.9, 1.0 Hz, 1H), 7.31 (dt, *J* = 8.2, 0.9 Hz, 1H), 7.26 – 7.23 (ddd, *J* = 8.1, 6.9, 1.2 Hz, 1H), 7.13 (ddd, *J* = 7.9, 6.9, 1.0 Hz, 1H), 6.91 (s, 1H), 3.90 (t, *J* = 7.2 Hz, 2H), 3.76 (s, 3H), 3.02 (ddd, *J* = 7.9, 7.1, 0.8 Hz, 2H), 0.95 (s, 9H), 0.08 (s, 6H); <sup>13</sup>C NMR (125 MHz, CDCl<sub>3</sub>) δ 136.8, 128.1, 126.9, 121.4, 119.0, 118.6, 111.5, 109.1, 64.1, 32.5, 29.0, 26.0, 18.4, -5.3; IR (NaCl/thin film): 3056, 2954, 2929, 2857, 1472, 1251, 1095, 836, 737 cm<sup>-1</sup>; HRMS (ESI) calc'd for [M+H]<sup>+</sup> 290.1940, found 290.1933.

<sup>5</sup> Hirose, T.; Sunazuka, T.; Yamamoto, D.; Kojima, N.; Shirahata, T.; Harigaya, Y.; Kuwajima, I.; Ōmura, S. *Tetrahedron*, **2005**, *61*, 6015.

### General Procedure C. Formal [3+2] cycloaddition of indoles and acrylates.

To a flame-dried flask was added indole (0.20 mmol, 1.00 equiv), acrylate (0.20 mmol, 1.00 equiv), and (*R*)-BINOL (0.04 mmol, 0.20 equiv). The flask was charged with CH<sub>2</sub>Cl<sub>2</sub> (1.5 mL), followed by addition of SnCl<sub>4</sub> (0.24 mmol, 1.20 equiv unless specifically indicated, 1 M in CH<sub>2</sub>Cl<sub>2</sub>), then stirred at room temperature. The reaction was quenched by diluting with 1 mL MeCN and 1 mL 1 M HCl, followed by addition of 5 mL H<sub>2</sub>O. The aqueous layer was extracted with ethyl acetate (3 x 5 mL) and the combined organic layers were washed with either saturated NaHCO<sub>3(aq)</sub> or 1 M NaOH<sub>(aq)</sub> (10 mL). The aqueous layer was back extracted with EtOAc (10 mL) and the combined organic layers were dried (Na<sub>2</sub>SO<sub>4</sub>), filtered and concentrated. The crude residue was purified by flash chromatography.

### Initial Screen of Chiral Diol Additives.

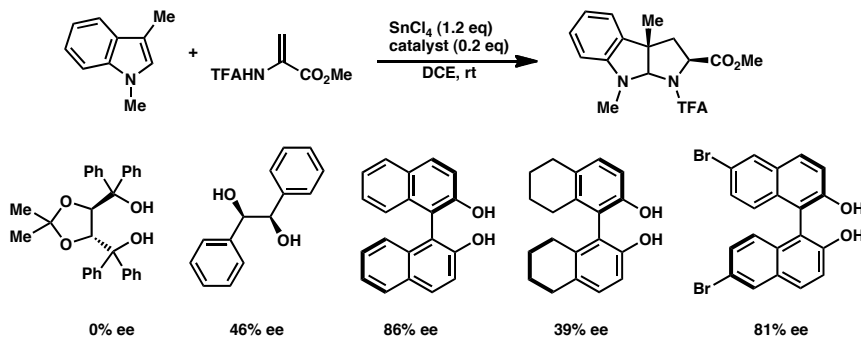

### Pyrroloindoline 7a.

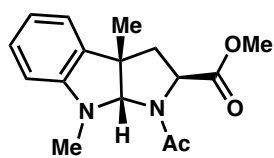

(a) *exo* diastereomer

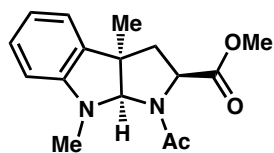

(b) *endo* diastereomer

Screen varying (*R*)-BINOL loading. All reactions were run at room temperature for 3 h in DCE with 1,3-dimethyl-1*H*-indole<sup>6</sup> (**6**, 0.2 mmol, 1 equiv), methyl 2-acetamidoacrylate<sup>7</sup> (**8**, 0.2 mmol, 1 equiv) and SnCl<sub>4</sub> (1.2 equiv, 1 M in CH<sub>2</sub>Cl<sub>2</sub>) Purified by flash chromatography (0→50% ethyl acetate/hexanes). The diastereomeric ratio was determined by <sup>1</sup>H NMR analysis of the crude reaction mixture. The diastereomers were separated by flash chromatography (30→50% ethyl acetate/hexanes). The enantiomeric excess was determined for both diastereomers by chiral SFC analysis (AD-H, 2.5 mL/min, 10% IPA in hexanes, λ = 254 nm).

<sup>6</sup> Rodriguez, J. G.; Lafuente, A.; Garcia-Almaraz, P.. *J. Heterocycl. Chem.* **2000**, *37*, 1281.

<sup>7</sup> Methyl 2-acetamidoacrylate is commercially available, or can be prepared according to Crestey, F.; Collot, V.; Steibing, S.; Rault, S. *Synthesis* **2006**, *20*, 3506.



| entry | R <sup>1</sup> , R <sup>2</sup> | pd <sup>t</sup> | BINOL (equiv)    | solvent | yield (%) | d.r. | ee (%) |
|-------|---------------------------------|-----------------|------------------|---------|-----------|------|--------|
| 1     | Me, Me ( <b>8</b> )             | <b>7a</b>       | 0.0              | DCE     | 64        | 6:1  | --     |
| 2     | Me, Me ( <b>8</b> )             | <b>7a</b>       | 1.1 <sup>c</sup> | DCE     | 86        | 4:1  | 64/83  |
| 3     | Me, Me ( <b>8</b> )             | <b>7a</b>       | 0.3              | DCE     | 96        | 5:1  | 62/81  |
| 4     | Me, Me ( <b>8</b> )             | <b>7a</b>       | 0.2              | DCE     | 94        | 5:1  | 63/83  |
| 5     | Me, Me ( <b>8</b> )             | <b>7a</b>       | 0.1              | DCE     | 93        | 5:1  | 61/79  |
| 6     | Me, Me ( <b>8</b> )             | <b>7a</b>       | 0.05             | DCE     | 82        | 5:1  | 51/72  |

*Exo diastereomer*: pale yellow oil.  $t_R(\text{major}) = 9.5$  min  $t_R(\text{minor}) = 6.2$  min. <sup>1</sup>H NMR (400 MHz, CDCl<sub>3</sub>; compound exists as a 1:1 mixture of rotamers)  $\delta$  7.10 – 7.01 (m, 1H), 6.95 (d,  $J = 7.3$  Hz, 0.5H), 6.91 (d,  $J = 7.3$  Hz, 0.5H), 6.68 (t,  $J = 7.4$  Hz, 0.5H), 6.62 (t,  $J = 7.4$  Hz, 0.5H), 6.43 (d,  $J = 7.8$  Hz, 0.5H), 6.38 (d,  $J = 7.8$  Hz, 0.5H), 5.47 (s, 0.5H), 5.04 (s, 0.5H), 4.43 (dd,  $J = 10.0, 1.9$  Hz, 0.5H), 4.30 (dd,  $J = 9.7, 4.7$  Hz, 0.5H), 3.73 (s, 1.5H), 3.66 (s, 1.5H), 2.98 (s, 1.5H), 2.80 (s, 1.5H), 2.44 (dd,  $J = 13.4, 10.0$  Hz, 0.5H), 2.32 (dd,  $J = 13.3, 9.8$  Hz, 0.5H), 2.22 (s, 0.5H), 2.18 (dd,  $J = 13.5, 2.0$  Hz, 0.5H), 1.97 – 1.90 (m, 2H), 1.46 (s, 1.5H), 1.32 (s, 1.5H); <sup>13</sup>C NMR (100 MHz, CDCl<sub>3</sub>; compound exists as a 1:1 mixture of rotamers)  $\delta$  172.8, 171.7, 171.5, 169.4, 149.4, 148.5, 134.2, 128.04, 128.02, 121.0, 120.8, 118.6, 117.6, 107.7, 107.1, 91.8, 90.8, 60.5, 59.6, 52.2, 51.8, 51.6, 49.2, 43.4, 41.0, 35.9, 33.8, 22.5, 22.3, 21.9; IR (NaCl/thin film): 2954, 2877, 1746, 1660, 1608, 1489, 1393, 1299, 1200, 1178, 744 cm<sup>-1</sup>;  $[\alpha]_D^{25} -69.7^\circ$  (c = 0.85, CH<sub>2</sub>Cl<sub>2</sub>); HRMS (FAB+) calc'd for [M+H]<sup>+</sup> 289.1552, found 289.1559.

*Endo diastereomer*: bright yellow oil.  $t_R(\text{major}) = 4.0$  min  $t_R(\text{minor}) = 4.7$  min. <sup>1</sup>H NMR (400 MHz, CDCl<sub>3</sub>; compound exists as a 3:1 mixture of rotamers, the major rotamer is denoted by \*, minor rotamer denoted by <sup>§</sup>)  $\delta$  7.11 (t,  $J = 7.6$  Hz, 1H<sup>§</sup>), 7.06 (t,  $J = 7.8$  Hz, 1H\*), 7.01 (d,  $J = 7.1$  Hz, 1H<sup>§</sup>), 6.96 (d,  $J = 7.2$  Hz, 1H\*), 6.68 (t,  $J = 7.4$  Hz, 1H<sup>§</sup>), 6.61 (t,  $J = 7.3$  Hz, 1H\*), 6.40 (d,  $J = 7.8$  Hz, 1H<sup>§</sup>), 6.32 (d,  $J = 7.8$  Hz, 1H\*), 5.55 (s, 1H\*), 5.09 (s, 1H<sup>§</sup>), 4.98 (dd,  $J = 8.8, 5.8$  Hz, 1H<sup>§</sup>), 4.46 (d,  $J = 8.3$  Hz, 1H\*), 3.46 (s, 3H<sup>§</sup>), 3.25 (s, 3H\*), 2.99 (s, 3H\*), 2.91 (s, 3H<sup>§</sup>), 2.68 (d,  $J = 13.6$  Hz, 1H\*), 2.44 – 2.16 (m, 1H\*, 5H<sup>§</sup>), 2.05 (s, 3H\*), 1.42 (s, 3H<sup>§</sup>), 1.41 (s, 3H\*); <sup>13</sup>C NMR (100 MHz, CDCl<sub>3</sub>; ; compound exists as a 3.0:1 mixture of rotamers, the major rotamer is denoted by \*, minor rotamer denoted by <sup>§</sup>)  $\delta$  171.4<sup>§</sup>, 171.1\*, 170.7\*, 169.6<sup>§</sup>, 150.6\*, 149.0<sup>§</sup>, 133.1<sup>§</sup>, 132.4\*, 128.7\*, 128.6<sup>§</sup>, 122.3\*, 121.8<sup>§</sup>, 118.0<sup>§</sup>, 117.1\*, 106.4<sup>§</sup>, 105.6\*, 91.1<sup>§</sup>, 86.4\*, 61.1\*, 59.1<sup>§</sup>, 52.3<sup>§</sup>, 52.2\*, 52.1<sup>§</sup>, 50.8\*, 42.6\*, 41.7<sup>§</sup>, 32.2\*, 31.6<sup>§</sup>, 24.7\*, 22.8<sup>§</sup>, 22.4\*, 21.9<sup>§</sup>; IR (NaCl/thin film): 2953, 2869, 1740, 1656, 1610, 1493, 1407, 1302, 1236, 1204, 744 cm<sup>-1</sup>;  $[\alpha]_D^{25} +146.5^\circ$  (c = 0.79, CH<sub>2</sub>Cl<sub>2</sub>) ; HRMS (FAB+) calc'd for [M+H]<sup>+</sup> 289.1552 , found 289.1549.

## Pyrroloindoline 7b.

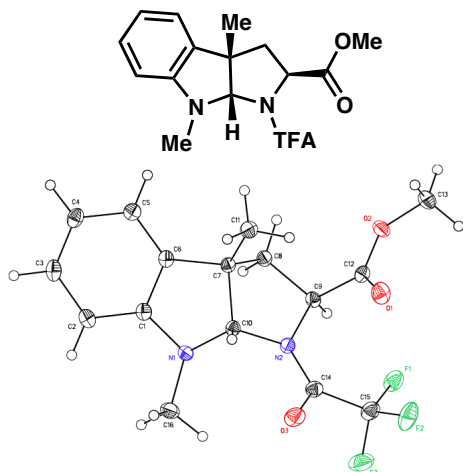

(a) *exo* diastereomer

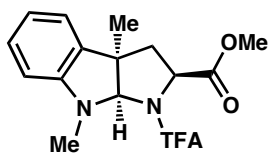

(b) *endo* diastereomer

Prepared from 1,3-dimethyl-1*H*-indole **6** and methyl 2-trifluoroacetamidoacrylate<sup>8</sup> **9** using general procedure C (with DCE as the solvent). The reaction was allowed to run for 4 h. The crude residue was purified by flash chromatography (20→35% ethyl acetate/hexanes) to yield 53.0 mg (77% yield) of **7b** in a 6:1 ratio of diastereomers (determined by <sup>1</sup>H NMR analysis of the purified product). The diastereomers were separated by preparatory HPLC (0→8% ethyl acetate/hexanes).

*Exo* diastereomer: pale yellow oil that crystallized upon standing in the fridge to give crystals suitable for single crystal X-ray diffraction. The enantiomeric excess was determined to be 86% by chiral SFC analysis (AD-H, 2.5 mL/min, 7% IPA in CO<sub>2</sub>, λ = 254 nm): *t*<sub>R</sub>(major) = 2.8 min *t*<sub>R</sub>(minor) = 2.4 min. <sup>1</sup>H NMR (400 MHz, CDCl<sub>3</sub>; compound exists as a 2.4:1 mixture of rotamers, the major rotamer is denoted by \*, minor rotamer denoted by §) δ 7.18 (t, *J* = 7.6 Hz, 1H\*, 1H<sup>§</sup>), 7.03 (d, *J* = 7.2 Hz, 1H\*, 1H<sup>§</sup>), 6.82 (br s, *J* = 7.4 Hz, 1H<sup>§</sup>), 6.77 (t, *J* = 7.3 Hz, 1H\*), 6.56 (br s, 1H<sup>§</sup>), 6.51 (d, *J* = 7.8 Hz, 1H\*), 5.62 (s, 1H\*), 5.34 (br s, 1H<sup>§</sup>), 4.72 (d, *J* = 9.2 Hz, 1H\*), 4.44 (br s, 1H<sup>§</sup>), 3.82 (br s, 3H\*), 3.77 (br s, 3H<sup>§</sup>), 3.08 (br s, 3H\*), 2.87 (br s, 3H<sup>§</sup>), 2.60 (dd, *J* = 13.0, 9.9 Hz, 1H\*), 2.55 – 2.44 (br m, 1H<sup>§</sup>), 2.37 (d, *J* = 12.7 Hz, 1H\*), 2.13-2.00 (br m, 1H<sup>§</sup>), 1.51 (s, 3H<sup>§</sup>), 1.40 (s, 3H\*); <sup>13</sup>C NMR (100 MHz, CDCl<sub>3</sub>; compound exists as a 2.4:1 mixture of rotamers, the major rotamer is denoted by \*, minor rotamer denoted by §) δ 172.6\*, 170.5<sup>§</sup>, 159.2\* (q, *J*<sub>C-F</sub> = 37.2 Hz), 149.4\*, 149.2<sup>§</sup>, 134.2\*<sup>§</sup>, 128.8\*<sup>§</sup>, 121.5\*<sup>§</sup>, 119.9<sup>§</sup>, 118.7\*, 116.1\* (q, *J*<sub>C-F</sub> = 288.4 Hz), 109.4<sup>§</sup>, 108.0\*, 93.3\*, 91.7<sup>§</sup>, 61.3<sup>§</sup>, 60.3\*, 53.0\*, 52.6<sup>§</sup>, 49.2\*<sup>§</sup>, 44.0\*, 40.6<sup>§</sup>, 36.8\*, 34.4<sup>§</sup>, 23.5\*, 22.8<sup>§</sup>; IR (NaCl/thin film): 2959, 1751, 1696, 1610, 1490, 1435, 1204, 1155, 988, 744 cm<sup>-1</sup>; melting point: 105.5 – 107.5 °C; [α]<sub>D</sub><sup>25</sup> = -118.1 (*c* = 0.78, CH<sub>2</sub>Cl<sub>2</sub>). HRMS (ESI) calc'd for [M+H]<sup>+</sup> 343.1270, found 343.1267.

*Endo* diastereomer: pale yellow oil. <sup>1</sup>H NMR (500 MHz, CDCl<sub>3</sub>; compound exists as a 9.0:1 mixture of rotamers, the major rotamer is denoted by \*, minor rotamer denoted by §) δ 7.13 (t, *J* = 7.7 Hz, 1H<sup>§</sup>), 7.10 (t, *J* = 7.7 Hz, 1H\*), 7.04 (d, *J* = 7.5 Hz, 1H<sup>§</sup>), 6.98 (d, *J* = 7.3 Hz, 1H\*), 6.73 (t, *J* = 7.4

<sup>8</sup> Synthesis of methyl 2-trifluoroacetamidoacrylate: Navarre, L.; Martinez, R.; Genet, J.; Darses, S. *J. Am. Chem. Soc.* **2008**, *130*, 6159.

Hz, 1H<sup>§</sup>), 6.66 (t,  $J = 7.4$  Hz, 1H\*), 6.43 (d,  $J = 7.8$  Hz, 1H<sup>§</sup>), 6.37 (d,  $J = 7.8$  Hz, 1H\*), 5.59 (s, 1H\*), 5.33 (s, 1H<sup>§</sup>), 5.07 (dd,  $J = 9.4, 5.2$  Hz, 1H<sup>§</sup>), 4.74 (d,  $J = 8.2$  Hz, 1H\*), 3.57 (s, 3H<sup>§</sup>), 3.16 (s, 3H\*), 3.05 (s, 3H\*), 2.80 (s, 3H<sup>§</sup>), 2.80 (d,  $J = 12.7$  Hz, 1H\*), 2.42 (dd,  $J = 13.3, 5.3$  Hz, 1H<sup>§</sup>), 2.37 (dd,  $J = 12.9, 8.3$  Hz, 1H\*), 2.26 (dd,  $J = 13.2, 9.7$  Hz, 1H<sup>§</sup>), 1.45 (s, 3H\*), 1.43 (s, 3H<sup>§</sup>); <sup>13</sup>C NMR (125 MHz, CDCl<sub>3</sub>; compound exists as a 9.0:1 mixture of rotamers, the major rotamer is denoted by \*, minor rotamer denoted by <sup>§</sup>)  $\delta$  169.9\*, 156.8\* (q,  $J_{C-F} = 36.9$  Hz), 150.4\*, 148.5<sup>§</sup>, 133.0<sup>§</sup>, 131.8\*, 129.1\*, 128.7<sup>§</sup>, 122.5\*, 121.6<sup>§</sup>, 118.6<sup>§</sup>, 117.8\*, 116.1\* (q,  $J_{C-F} = 288.7$  Hz), 106.9<sup>§</sup>, 105.7\*, 90.8<sup>§</sup>, 88.5\*, 60.3<sup>§</sup>, 60.1\*, 52.5\*, 52.2<sup>§</sup>, 50.4\*<sup>§</sup>, 42.9\*, 41.1<sup>§</sup>, 32.1\*<sup>§</sup>, 25.1\*, 22.2<sup>§</sup>; IR (NaCl/thin film): 2954, 2923, 1741, 1694, 1608, 1494, 1435, 1206, 1147, 998, 860, 844, 742 cm<sup>-1</sup>; [ $\alpha$ ]<sub>D</sub><sup>25</sup> = +201.5 ( $c = 0.11$ , CH<sub>2</sub>Cl<sub>2</sub>). HRMS (ESI) calc'd for [M+H]<sup>+</sup> 343.1270, found 343.1278.

### Pyrroloindoline 7c.

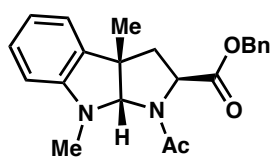

(a) *exo* diastereomer

Prepared from 1,3-dimethyl-1*H*-indole **6** and benzyl 2-acetamidoacrylate<sup>9</sup> **10** using general procedure C (with DCE as the solvent). The reaction was allowed to run for 4 h. The product **7c** was formed in a 2:1 ratio of diastereomers (determined by <sup>1</sup>H NMR analysis of the crude reaction mixture), and purified by flash chromatography (20→35% ethyl acetate/hexanes) to yield 41.3 mg (57% yield) of the *exo* diastereomer and 17.3 mg (24% yield) of the *endo* diastereomer.

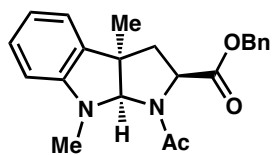

(b) *endo* diastereomer

*Exo diastereomer*: pale yellow oil. The enantiomeric excess was determined to be 74% by chiral SFC analysis (AD-H, 2.5 mL/min, 10% IPA in CO<sub>2</sub>,  $\lambda = 254$  nm):  $t_R$ (major) = 24.6 min  $t_R$ (minor) = 19.1 min. <sup>1</sup>H NMR (300 MHz, CDCl<sub>3</sub>;

compound exists as a 1.1:1 mixture of rotamers, the major rotamer is denoted by \*, minor rotamer denoted by <sup>§</sup>)  $\delta$  7.43 – 7.29 (m, 5H\*, 5H<sup>§</sup>), 7.19 – 7.09 (m, 1H\*, 1H<sup>§</sup>), 7.01 (d,  $J = 7.3$  Hz, 1H<sup>§</sup>), 6.96 (d,  $J = 7.3$  Hz, 1H\*), 6.76 (t,  $J = 8.4$  Hz, 1H<sup>§</sup>), 6.70 (t,  $J = 7.4$  Hz, 1H\*), 6.50 (d,  $J = 8.2$  Hz, 1H<sup>§</sup>), 6.46 (d,  $J = 8.0$  Hz, 1H\*), 5.54 (s, 1H\*), 5.28 (d,  $J = 12.0$  Hz, 1H\*), 5.21 (d,  $J = 9.7$  Hz, 1H<sup>§</sup>), 5.20 (s, 1H\*, 1H<sup>§</sup>), 5.09 (s, 1H<sup>§</sup>), 4.51 (dd,  $J = 10.1, 2.1$  Hz, 1H\*), 4.45 (dd,  $J = 9.8, 4.8$  Hz, 1H<sup>§</sup>), 3.06 (s, 3H\*), 2.89 (s, 3H<sup>§</sup>), 2.53 (dd,  $J = 13.4, 10.0$  Hz, 1H\*), 2.42 (dd,  $J = 13.3, 9.7$  Hz, 1H<sup>§</sup>), 2.31 (s, 3H<sup>§</sup>), 2.22 (dd,  $J = 13.5, 2.0$  Hz, 1H\*), 2.01 (dd,  $J = 13.3, 4.8$  Hz, 1H<sup>§</sup>), 1.95 (s, 3H\*), 1.49 (s, 3H<sup>§</sup>), 1.32 (s, 3H\*); <sup>13</sup>C NMR (100 MHz, CDCl<sub>3</sub>; compound exists as a 1.1:1 mixture of rotamers, the major rotamer is denoted

<sup>9</sup> Synthesis of benzyl 2-acetamidoacrylate: Liu, G.; Xin, Z.; Liang, H.; Abad-Zapatero, C.; Hajduk, P.J.; Janowick, D.A.; Szczepankiewicz, B.G.; Pei, Z.; Hutchins, C.W.; Ballaron, S.J.; Stashko, M.A.; Lubben, T.H.; Berg, C.E.; Rondinone, C.M.; Trevillyan, J.M.; Jirousek, M.R. *J. Med. Chem.* **2003**, *46*, 3437.

by \*, minor rotamer denoted by <sup>§</sup>)  $\delta$  172.6\*, 172.0<sup>§</sup>, 171.6\*, 170.0<sup>§</sup>, 149.9\*, 148.9<sup>§</sup>, 135.7<sup>§</sup>, 134.9\*, 134.7\*, 134.6<sup>§</sup>, 128.8<sup>§</sup>, 128.7\*, 128.7\*, 128.5<sup>§</sup>, 128.5\*, 128.2\*, 128.2<sup>§</sup>, 121.5<sup>§</sup>, 121.2\*, 119.1<sup>§</sup>, 118.1\*, 108.1<sup>§</sup>, 107.7\*, 92.4<sup>§</sup>, 91.4\*, 67.6\*, 66.9<sup>§</sup>, 61.1\*, 60.2<sup>§</sup>, 52.3<sup>§</sup>, 49.7\*, 43.8\*, 41.4<sup>§</sup>, 36.5\*, 34.3<sup>§</sup>, 23.0<sup>§</sup>, 22.7\*, 22.7\*, 22.4<sup>§</sup>; IR (NaCl/thin film): 3032, 2962, 2877, 1745, 1661, 1609, 1489, 1390, 1175, 1117, 744 cm<sup>-1</sup>;  $[\alpha]_D^{25} = -66.9$  ( $c = 0.98$ , CH<sub>2</sub>Cl<sub>2</sub>). HRMS (ESI) calc'd for [M+H]<sup>+</sup> 365.1865, found 365.1875.

*Endo diastereomer*: pale yellow oil. The enantiomeric excess was determined to be 82% by chiral SFC analysis (AD-H, 2.5 mL/min, 10% IPA in CO<sub>2</sub>,  $\lambda = 254$  nm):  $t_R$ (major) = 11.1 min  $t_R$ (minor) = 12.6 min. <sup>1</sup>H NMR (500 MHz, CDCl<sub>3</sub>; compound exists as a 3.0:1 mixture of rotamers, the major rotamer is denoted by \*, minor rotamer denoted by <sup>§</sup>)  $\delta$  7.36 – 7.28 (m, 3H\*, 3H<sup>§</sup>), 7.23 – 7.20 (m, 2H<sup>§</sup>), 7.19 – 7.15 (m, 2H\*), 7.12 (td,  $J = 7.7, 1.3$  Hz, 1H<sup>§</sup>), 7.08 (td,  $J = 7.7, 1.3$  Hz, 1H\*), 7.01 (dd,  $J = 7.3, 0.9$  Hz, 1H<sup>§</sup>), 6.98 (dd,  $J = 7.3, 0.9$  Hz, 1H\*), 6.69 (td,  $J = 7.4, 0.9$  Hz, 1H<sup>§</sup>), 6.64 (td,  $J = 7.4, 0.9$  Hz, 1H\*), 6.36 (d,  $J = 7.8$  Hz, 1H<sup>§</sup>), 6.28 (d,  $J = 7.8$  Hz, 1H\*), 5.56 (s, 1H\*), 5.09 (s, 1H<sup>§</sup>), 5.05 (dd,  $J = 9.0, 6.0$  Hz, 1H<sup>§</sup>), 4.92 (d,  $J = 12.4$  Hz, 1H<sup>§</sup>), 4.88 (d,  $J = 12.4$  Hz, 1H<sup>§</sup>), 4.69 (d,  $J = 12.2$  Hz, 1H\*), 4.55 (d,  $J = 12.2$  Hz, 1H\*), 4.51 (dd,  $J = 8.5, 1.9$  Hz, 1H\*), 2.93 (s, 3H\*), 2.81 (s, 3H<sup>§</sup>), 2.73 (dd,  $J = 12.8, 1.8$  Hz, 1H\*), 2.37 (dd,  $J = 13.0, 6.0$  Hz, 1H<sup>§</sup>), 2.33 (dd,  $J = 12.8, 8.5$  Hz, 1H\*), 2.31 (s, 3H<sup>§</sup>), 2.26 (dd,  $J = 13.0, 9.0$  Hz, 1H<sup>§</sup>), 2.05 (s, 3H\*), 1.42 (s, 3H<sup>§</sup>), 1.41 (s, 3H\*); <sup>13</sup>C NMR (125 MHz, CDCl<sub>3</sub>; compound exists as a 3.0:1 mixture of rotamers, the major rotamer is denoted by \*, minor rotamer denoted by <sup>§</sup>)  $\delta$  170.8\*, 170.5\*, 169.6<sup>§</sup>, 150.4\*, 148.9<sup>§</sup>, 135.5<sup>§</sup>, 134.9\*, 133.1<sup>§</sup>, 132.5\*, 128.8\*, 128.6<sup>§</sup>, 128.5\*, 128.4<sup>§</sup>, 128.4\*, 128.2\*, 128.1<sup>§</sup>, 128.0<sup>§</sup>, 122.4\*, 121.8<sup>§</sup>, 118.0<sup>§</sup>, 117.2\*, 106.5<sup>§</sup>, 105.7\*, 91.3<sup>§</sup>, 86.5\*, 67.3\*, 66.7<sup>§</sup>, 61.3\*, 59.3<sup>§</sup>, 52.3<sup>§</sup>, 50.8\*, 42.6\*, 41.8<sup>§</sup>, 32.3\*, 31.6<sup>§</sup>, 24.8\*, 22.7<sup>§</sup>, 22.5\*, 21.9<sup>§</sup>; IR (NaCl/thin film): 2956, 1741, 1656, 1608, 1493, 1404, 1301, 1219, 1194, 1152, 1105, 992, 743 cm<sup>-1</sup>;  $[\alpha]_D^{25} = +114.4$  ( $c = 0.57$ , CH<sub>2</sub>Cl<sub>2</sub>). HRMS (ESI) calc'd for [M+H]<sup>+</sup> 365.1865, found 365.1862.

### Pyrroloindoline 7d.

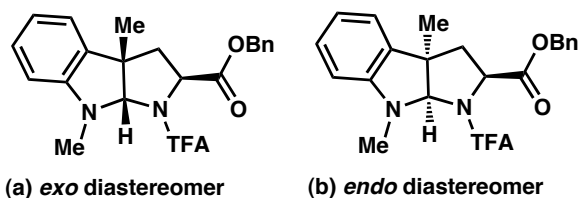

Prepared from 1,3-dimethyl-1*H*-indole (**6**, 0.15 mmol) and benzyl 2-trifluoroacetamidoacrylate<sup>10</sup> (**11**, 0.15 mmol) using general procedure C. The reaction was allowed to run for 5.5 h. The crude residue was purified

<sup>10</sup> Synthesis of benzyl 2-trifluoroacetamido acrylate: Crossley, M.; Stamford, A. *Aust. J. Chem.* **1994**, *47*, 1695.

by flash chromatography (5→8% ethyl acetate/hexanes) to yield 54 mg (86% yield) of **7d** in a 4:1 ratio of diastereomers (determined by NMR analysis of the crude reaction mixture). The diastereomers were separated by flash chromatography (5→8% ethyl acetate/hexanes). The enantiomeric excesses of both diastereomers were determined by chiral SFC analysis (OJ-H, 2.5 mL/min, 3% IPA in CO<sub>2</sub>, λ = 254 nm)

*Exo diastereomer*: pale yellow oil. The enantiomeric excess was determined to be 94%.  $t_R(\text{major}) = 12.5$  min  $t_R(\text{minor}) = 10.7$  min. <sup>1</sup>H NMR (500 MHz, CDCl<sub>3</sub>; compound exists as a 2.6:1 mixture of rotamers, the major rotamer is denoted by \*, minor rotamer denoted by §) δ 7.53-7.36 (m, 5H\*, 5H§), 7.23 (br t,  $J = 7.6$  Hz, 1H\*, 1H§), 7.11 (br d,  $J = 6.7$  Hz, 1H§), 7.07 (br d,  $J = 7.2$  Hz, 1H\*), 6.93 – 6.86 (m, 1H§), 6.83 (br t,  $J = 7.3$  Hz, 1H\*), 6.64 (br d,  $J = 7.3$  Hz, 1H§), 6.57 (br d,  $J = 7.8$  Hz, 1H\*), 5.69 (s, 1H\*), 5.42 (s, 1H§), 5.36 – 5.21 (m, 2H\*, 2H§), 4.82 (br d,  $J = 9.2$  Hz, 1H\*), 4.57 (m, 1H§), 3.14 (br s, 3H\*), 2.94 (br s, 3H§), 2.60 (br dd,  $J = 13.3, 9.7$  Hz, 1H\*), 2.60 – 2.52 (m, 1H§), 2.41 (br d,  $J = 14.7$  Hz, 1H\*), 2.12 (br dd,  $J = 12.7, 6.0$  Hz, 1H§), 1.54 (s, 3H§), 1.34 (s, 3H\*); <sup>13</sup>C NMR (100 MHz, CDCl<sub>3</sub>; compound exists as a 2.6:1 mixture of rotamers, the major rotamer is denoted by \*, minor rotamer denoted by §) δ 171.9\*, 169.6§, 158.9 (q,  $J_{C-F} = 37.0$  Hz)\*, 157.3 (q,  $J_{C-F} = 38.1$  Hz)§, 149.2\*, 149.0§, 135.1§, 134.5\*, 134.2\*, 134.0§, 128.6\*, 128.6\*, 128.5\*, 128.4§, 128.2§, 128.1§, 121.3\*, 119.8§, 188.5\*, 116.0 (q,  $J_{C-F} = 288.6$  Hz)\*, 109.3§, 107.8\*, 93.1\*, 91.6§, 67.8\*, 67.1§, 61.2§, 60.2 (q,  $J_{C-F} = 2.44$  Hz)\*, 52.9§, 49.0\*, 43.6\*, 40.2§, 36.5\*, 34.2§, 23.1\*, 22.5§; IR (NaCl/thin film): 3034, 2966, 1747, 1695, 1610, 1490, 1456, 1432, 1188, 1156, 745 cm<sup>-1</sup>;  $[\alpha]_D^{25} -90.1^\circ$  (c = 1.11, CH<sub>2</sub>Cl<sub>2</sub>); HRMS (FAB+) calc'd for [M+H]<sup>+</sup> 419.1583, found 419.1562.

*Endo diastereomer*: pale yellow oil. The enantiomeric excess was determined to be 91%.  $t_R(\text{major}) = 5.8$  min  $t_R(\text{minor}) = 5.0$  min. <sup>1</sup>H NMR (500 MHz, CDCl<sub>3</sub>; compound exists as a 10.0:1 mixture of rotamers, the major rotamer is denoted by \*, minor rotamer denoted by §) δ 7.43 – 7.30 (m, 3H\*, 3H§) 7.22 (dd,  $J = 6.8, 2.8$  Hz, 1H§), 7.20-7.09 (m, 2H\*, 1H§), 7.04 (d,  $J = 7.3$  Hz, 1H§), 7.00 (d,  $J = 7.3$  Hz, 1H\*), 6.78 – 6.72 (m, 1H§), 6.68 (t,  $J = 7.4$  Hz, 1H\*), 6.36 (d,  $J = 7.8$  Hz, 1H§), 6.27 (d,  $J = 7.8$  Hz, 1H\*), 5.60 (s, 1H\*), 5.32 (s, 1H§), 5.14 (dd,  $J = 9.5, 4.9$  Hz, 1H§), 5.04 (d,  $J = 12.4$  Hz, 1H§), 4.94 (d,  $J = 12.4$  Hz, 1H§), 4.79 (d,  $J = 8.1$  Hz, 1H\*), 4.63 (d,  $J = 12.1$  Hz, 1H\*), 4.36 (d,  $J = 12.1$  Hz, 1H\*), 2.95 (s, 3H\*), 2.85 (d,  $J = 12.9$  Hz, 1H\*), 2.65 (s, 3H§), 2.46 (dd,  $J = 13.3, 5.3$  Hz, 1H§), 2.39 (dd,  $J = 13.0, 8.4$  Hz, 1H\*), 2.28 (dd,  $J = 13.3, 9.7$  Hz, 1H§), 1.46 (s, 3H\*), 1.43 (s, 3H§); <sup>13</sup>C NMR (125 MHz, CDCl<sub>3</sub>; compound exists as a 10.0:1 mixture of rotamers, the major rotamer is denoted by \*, minor rotamer denoted by §) δ 169.3§, 169.2\*, 156.9 (q,  $J_{C-F} = 36.7$  Hz)§, 150.3\*, 148.5§, 135.2§, 134.6\*, 133.1§, , 131.8\*, 129.1\*, 128.7§, 128.5§, 128.44\*, 128.40\*, 128.3\*, 128.2§, 122.5\*, 121.6§, 118.6§,

117.7\*, 116.1 (q,  $J=288.8$ )\*, 107.0<sup>§</sup>, 105.9\*, 90.9<sup>§</sup>, 88.6\*, 67.6\*, 67.2<sup>§</sup>, 60.5<sup>§</sup>, 60.3 (q,  $J_{C-F} = 3.1$  Hz)\*, 52.2<sup>§</sup>, 50.4\*, 42.9\*, 41.1<sup>§</sup>, 32.0\*, 29.7<sup>§</sup>, 25.2\*, 22.3<sup>§</sup>; IR (NaCl/thin film): 3034, 2960, 1752, 1741, 1697, 1609, 1494, 1442, 1211, 1149, 742  $\text{cm}^{-1}$ ;  $[\alpha]_{\text{D}}^{25} +187.7^\circ$  ( $c = 0.78$ ,  $\text{CH}_2\text{Cl}_2$ ); HRMS (FAB+) calc'd for  $[\text{M}+\text{H}]^+$  418.1504, found 418.1517.

### Pyrroloindoline product from reaction with 3-methyl-1*H*-indole.

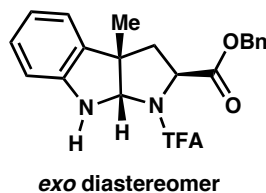

Prepared from 3-methyl-1*H*-indole (0.15 mmol) and benzyl 2-trifluoroacetamidoacrylate (**11**, 0.15 mmol) using general procedure C. The reaction was allowed to run for 5.5 h. The crude residue was purified by flash chromatography (0→20% ethyl acetate/hexanes) to yield 10.7 mg (18% yield) of pyrroloindoline in an 8:1 ratio of diastereomers (determined by NMR analysis of the pure product). The diastereomers were separated by preparatory HPLC (5→12% ethyl acetate/hexanes).

*Exo diastereomer*: pale yellow oil. The enantiomeric excess was determined to be 95% by chiral SFC analysis (OJ-H, 2.5 mL/min, 7% IPA in hexanes,  $\lambda = 254$  nm):  $t_{\text{R}}$ (major) = 9.6 min  $t_{\text{R}}$ (minor) = 7.4 min.  $^1\text{H}$  NMR (500 MHz,  $\text{CDCl}_3$ ; compound exists as a 1:1 mixture of rotamers)  $\delta$  7.43 – 7.31 (m, 5H), 7.12 (t,  $J = 8.1$  Hz, 0.5H), 7.10 (t,  $J = 8.1$  Hz, 0.5H), 7.05 (d,  $J = 4.1$  Hz, 0.5H), 7.04 (d,  $J = 3.9$  Hz, 0.5H), 6.82 (t,  $J = 7.5$  Hz, 0.5H), 6.77 (t,  $J = 7.5$  Hz, 0.5H), 6.64 (d,  $J = 7.8$  Hz, 0.5H), 6.60 (d,  $J = 7.8$  Hz, 0.5H), 5.63 (s, 0.5 H), 5.57 (s, 0.5H), 5.30 (s, 0.5H), 5.23 (s, 1H), 5.22 (d,  $J = 12.2$  Hz, 0.5H), 5.17 (d,  $J = 12.2$  Hz, 0.5H), 4.76 (s, 0.5H), 4.68 – 4.62 (m, 0.5H), 4.50 (t,  $J = 7.7$  Hz, 0.5H), 2.72 (dd,  $J = 13.5, 9.2$  Hz, 0.5H), 2.58 (dd,  $J = 13.1, 8.5$  Hz, 0.5H), 2.33 (dd,  $J = 13.4, 3.9$  Hz, 0.5H), 2.17 (dd,  $J = 13.1, 6.9$  Hz, 0.5H), 1.44 (s, 1.5H), 1.31 (s, 1.5H);  $^{13}\text{C}$  NMR (125 MHz,  $\text{CDCl}_3$ ; compound exists as a 1:1 mixture of rotamers)  $\delta$  171.5, 170.2, 156.8 (q,  $J_{C-F} = 38.7$  Hz), 146.8, 146.3, 135.2, 134.7, 133.2, 133.1, 128.9, 128.8, 128.7, 128.6, 128.5, 128.4, 122.3, 122.1, 120.2, 119.3, 116.1 (q,  $J_{C-F} = 287.2$ ), 115.7 (q,  $J_{C-F} = 287.2$ ), 109.9, 109.3, 86.5, 84.5, 68.10, 67.5, 61.3, 59.6, 54.5, 50.3, 43.7, 40.3, 24.2, 23.9; IR (NaCl/thin film): 3390, 3034, 2961, 2920, 1748, 1687, 1610, 1486, 1469, 1456, 1189, 1158, 745  $\text{cm}^{-1}$ ;  $[\alpha]_{\text{D}}^{25} -111.8^\circ$  ( $c = 0.22$ ,  $\text{CH}_2\text{Cl}_2$ ); HRMS (EI+) calc'd for  $\text{M}^+$  404.1348, found 404.1344.

### Pyrroloindoline 13a.

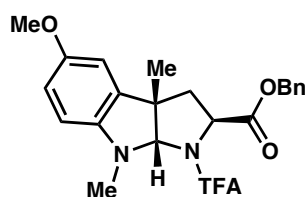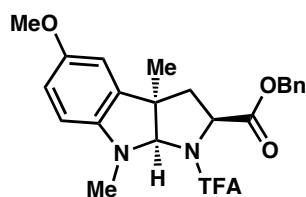

Prepared from 5-methoxy-1,3-dimethyl-1*H*-indole<sup>11</sup> and benzyl 2-trifluoroacetamidoacrylate using general procedure C. The reaction was allowed to

<sup>11</sup> Underwood, R.; Prasad, K.; Repic, O.; Hardtmann, G.E.. *Synth. Commun.* **1992**, 22, 343.

run for 4 h. The crude residue was purified by flash chromatography (5→10% ethyl acetate/hexanes) to yield 83.1 mg (93% yield) of **13a** in a 3:1 ratio of diastereomers (determined by HPLC analysis of the purified product). The diastereomers were separated by preparatory HPLC (0→10% ethyl acetate/hexanes). The enantiomeric excesses of both diastereomers were determined by chiral HPLC analysis (OD-H, 1 mL/min, 10% IPA in hexanes,  $\lambda = 254$  nm).

*Exo diastereomer*: pale yellow oil. The enantiomeric excess was determined to be 93%.  $t_{\text{R}}(\text{major}) = 11.3$  min  $t_{\text{R}}(\text{minor}) = 9.9$  min.  $^1\text{H}$  NMR (400 MHz,  $\text{CDCl}_3$ ; compound exists as a 1.7:1 mixture of rotamers, the major rotamer is denoted by \*, minor rotamer denoted by §)  $\delta$  7.46 – 7.29 (m, 5H\*, 5H $^{\S}$ ), 6.72 (d,  $J = 8.4$  Hz, 1H\*, 1H $^{\S}$ ), 6.63 (d,  $J = 13.4$  Hz, 1H\*, 1H $^{\S}$ ), 6.55 (d,  $J = 8.4$  Hz, 1H $^{\S}$ ), 6.44 (d,  $J = 8.5$  Hz, 1H\*), 5.53 (br s, 1H\*), 5.24 (br s, 2H\*, 1H $^{\S}$ ), 5.19 (br s, 2H $^{\S}$ ), 4.76 (br d,  $J = 9.3$  Hz, 1H\*), 4.44 (t,  $J = 7.8$  Hz, 1H $^{\S}$ ), 3.75 (br s, 3H\*, 3H $^{\S}$ ), 3.04 (br s, 3H\*), 2.86 (br s, 3H $^{\S}$ ), 2.61 – 2.48 (m, 1H\*, 1H $^{\S}$ ), 2.31 (d,  $J = 13.4$  Hz, 1H\*), 2.09 – 1.99 (m, 1H $^{\S}$ ), 1.45 (br s, 3H $^{\S}$ ), 1.26 (br s, 3H\*);  $^{13}\text{C}$  NMR (100 MHz,  $\text{CDCl}_3$ ; compound exists as a 1.7:1 mixture of rotamers, the major rotamer is denoted by \*, minor rotamer denoted by §)  $\delta$  172.0\*, 169.9 $^{\S}$ , 159.0\* (q,  $J_{\text{C-H}} = 36.8$  Hz), 154.7 $^{\S}$ , 153.6\*, 143.7\* $^{\S}$ , 135.8 $^{\S}$ , 135.8\*, 135.2 $^{\S}$ , 134.6\*, 128.8 $^{\S}$ , 128.8\*, 128.7\*, 128.6 $^{\S}$ , 128.4 $^{\S}$ , 128.3\*, 116.1\* (q,  $J_{\text{C-F}} = 288.6$  Hz), 113.4 $^{\S}$ , 113.1\*, 111.5\*, 109.0\*, 108.8 $^{\S}$ , 94.2\*, 92.4 $^{\S}$ , 68.1\*, 67.3 $^{\S}$ , 61.2 $^{\S}$ , 60.4\*, 55.9\*, 53.6 $^{\S}$ , 49.3 $^{\S}$ , 43.8\*, 39.9 $^{\S}$ , 38.1\*, 36.9 $^{\S}$ , 23.5 $^{\S}$ , 23.4\*; IR (NaCl/thin film): 2963, 2833, 1748, 1694, 1497, 1432, 1156, 1030, 991, 754  $\text{cm}^{-1}$ ;  $[\alpha]_{\text{D}}^{25} = -78.1$  ( $c$  1.07,  $\text{CH}_2\text{Cl}_2$ ); HRMS (ESI) calc'd for  $[\text{M}+\text{H}]^+$  449.1683, found 449.1676.

*Endo diastereomer*: pale yellow oil. The enantiomeric excess was determined to be 92%.  $t_{\text{R}}(\text{major}) = 6.6$  min  $t_{\text{R}}(\text{minor}) = 7.4$  min.  $^1\text{H}$  NMR (500 MHz,  $\text{CDCl}_3$ ; compound exists as a 6.1:1 mixture of rotamers, the major rotamer is denoted by \*, minor rotamer denoted by §)  $\delta$  7.37 – 7.29 (m, 3H\*, 3H $^{\S}$ ), 7.24 – 7.21 (m, 2H $^{\S}$ ), 7.19 – 7.12 (m, 2H\*), 6.68 (dd,  $J = 8.4, 2.5$  Hz, 1H\*, 1H $^{\S}$ ), 6.67 (d,  $J = 2.5$  Hz, 1H $^{\S}$ ), 6.63 (d,  $J = 2.5$  Hz, 1H\*), 6.31 – 6.26 (m, 1H $^{\S}$ ), 6.19 (d,  $J = 8.4$  Hz, 1H\*), 5.57 (s, 1H\*), 5.22 (br d,  $J = 1.8$  Hz, 1H $^{\S}$ ), 5.13 (dd,  $J = 9.7, 5.3$  Hz, 1H $^{\S}$ ), 5.07 (d,  $J = 12.3$  Hz, 1H $^{\S}$ ), 4.97 (d,  $J = 12.3$  Hz, 1H $^{\S}$ ), 4.78 (d,  $J = 8.4$  Hz, 1H\*), 4.66 (d,  $J = 12.1$  Hz, 1H\*), 4.46 (d,  $J = 12.1$  Hz, 1H\*), 3.75 (s, 3H $^{\S}$ ), 3.72 (s, 3H\*), 2.92 (s, 3H\*), 2.81 (d,  $J = 13.0$  Hz, 1H\*), 2.59 (d,  $J = 1.3$  Hz, 3H $^{\S}$ ), 2.45 (dd,  $J = 13.3, 5.3$  Hz, 1H $^{\S}$ ), 2.36 (dd,  $J = 13.0, 8.4$  Hz, 1H\*), 2.26 (dd,  $J = 13.3, 9.7$  Hz, 1H $^{\S}$ ), 1.44 (s, 3H\*), 1.40 (s, 3H $^{\S}$ );  $^{13}\text{C}$  NMR (125 MHz,  $\text{CDCl}_3$ ; compound exists as a 6.1:1 mixture of rotamers, the major rotamer is denoted by \*, minor rotamer denoted by §)  $\delta$  169.4 $^{\S}$ , 169.1\*, 156.9\* (q,  $J_{\text{C-F}} = 36.7$  Hz), 153.4 $^{\S}$ , 152.8\*, 144.7\*, 142.7 $^{\S}$ , 135.3 $^{\S}$ , 134.7\*, 134.5 $^{\S}$ , 133.2\*, 128.5\*, 128.4\*, 128.3\*, 128.3 $^{\S}$ , 128.1 $^{\S}$ ,

116.2\* (q,  $J_{C-F} = 288.8$  Hz), 113.5\*, 112.8<sup>§</sup>, 110.0\*, 109.4<sup>§</sup>, 107.7<sup>§</sup>, 106.4\*, 91.6<sup>§</sup>, 89.4\*, 67.7\*, 67.2<sup>§</sup>, 60.5<sup>§</sup>, 60.2\*, 56.0\*, 56.9<sup>§</sup>, 52.2<sup>§</sup>, 50.6\*, 42.8\*, 40.8<sup>§</sup>, 32.6\*, 32.0<sup>§</sup>, 25.1\*, 22.2<sup>§</sup>; IR (NaCl/thin film): 2957, 1750, 1697, 1500, 1446, 1282, 1210, 1157, 1031, 994, 850  $\text{cm}^{-1}$ ;  $[\alpha]_{\text{D}}^{25} = +162.4$  ( $c$  1.41,  $\text{CH}_2\text{Cl}_2$ ); HRMS (ESI) calc'd for  $[\text{M}+\text{H}]^+$  449.1683, found 449.1682.

### Pyrroloindoline 13b.

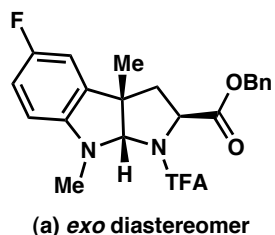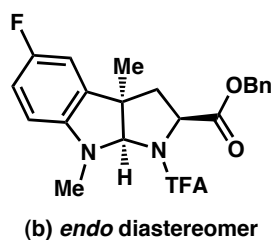

Prepared from 5-fluoro-1,3-dimethyl-1*H*-indole **12b** and benzyl 2-trifluoroacetamidoacrylate using general procedure C. The reaction was allowed to run for 5.5 h. The crude residue was purified by flash chromatography (5→12% ethyl acetate/hexanes) to yield 53.0 mg (61% yield) of **13b** in a 3:1 ratio of diastereomers (determined by  $^1\text{H}$  NMR analysis of the purified product). The diastereomers were separated by preparatory HPLC (0→8% ethyl acetate/hexanes). The enantiomeric excesses of both diastereomers were determined by chiral HPLC analysis (OD-H, 1 mL/min, 3% IPA in hexanes,  $\lambda = 254$  nm).

*Exo* diastereomer: pale yellow oil. The ee was determined to be 93%.

$t_{\text{R}}$ (major) = 14.7 min  $t_{\text{R}}$ (minor) = 18.0 min.  $^1\text{H}$  NMR (500 MHz,  $\text{CDCl}_3$ ; compound exists as a 2.3:1 mixture of rotamers, the major rotamer is denoted by \*, minor rotamer denoted by <sup>§</sup>)  $\delta$  7.38 (br s, 5H\*, 5H<sup>§</sup>), 6.85 (br t,  $J = 7.8$  Hz, 1H\*, 1H<sup>§</sup>), 6.75 (br s, 1H<sup>§</sup>), 6.71 (br d,  $J = 7.8$  Hz, 1H\*), 6.50 (br s, 1H<sup>§</sup>), 6.39 (dd,  $J = 8.4, 3.8$  Hz, 1H\*), 5.58 (br s, 1H\*), 5.34 – 5.16 (m, 2H\*, 3H<sup>§</sup>), 4.75 (br d,  $J = 9.3$  Hz, 1H\*), 4.47 (br t,  $J = 6.8$  Hz, 1H<sup>§</sup>), 3.04 (br s, 3H\*), 2.85 (br s, 3H<sup>§</sup>), 2.55 (dd,  $J = 13.2, 9.9$  Hz, 1H\*), 2.55 – 2.45 (m, 1H<sup>§</sup>), 2.31 (br d,  $J = 13.4$  Hz, 1H\*), 2.10 – 1.97 (m, 1H<sup>§</sup>), 1.45 (br s, 3H<sup>§</sup>), 1.24 (s, 3H\*);  $^{13}\text{C}$  NMR (125 MHz,  $\text{CDCl}_3$ ; compound exists as a 2.3:1 mixture of rotamers, the major rotamer is denoted by \*, minor rotamer denoted by <sup>§</sup>)  $\delta$  171.9\*, 169.7<sup>§</sup>, 159.1\* (q,  $J_{C-F} = 37.1$  Hz), 157.0\* (d,  $J_{C-F} = 236.5$  Hz), 145.6\*, 145.4<sup>§</sup>, 135.7\* (d,  $J_{C-F} = 7.3$  Hz), 135.1<sup>§</sup>, 134.6\*, 128.9\*, 128.8\*, 128.7\*, 128.6<sup>§</sup>, 128.5<sup>§</sup>, 128.4<sup>§</sup>, 116.2\* (q,  $J_{C-F} = 267.0$  Hz), 114.9<sup>§</sup>, 114.7\* (d,  $J_{C-F} = 23.0$  Hz), 110.5<sup>§</sup>, 109.3\* (d,  $J_{C-F} = 24.3$  Hz), 108.6\* (d,  $J_{C-F} = 7.8$  Hz), 93.9\*, 92.2<sup>§</sup>, 68.2\*, 67.5<sup>§</sup>, 61.3<sup>§</sup>, 60.3\*, 53.2<sup>§</sup>, 49.2\*, 43.7\*, 40.1<sup>§</sup>, 37.6\*, 35.6<sup>§</sup>, 23.3\*, 22.9<sup>§</sup>; IR (NaCl/thin film): 2966, 1748, 1698, 1495, 1434, 1350, 1270, 1157, 994, 843  $\text{cm}^{-1}$ ;  $[\alpha]_{\text{D}}^{25} = -81.7$  ( $c$  1.14,  $\text{CH}_2\text{Cl}_2$ ); HRMS (ESI) calc'd for  $[\text{M}+\text{H}]^+$  437.1483, found 437.1476.

*Endo* diastereomer: pale yellow oil. The enantiomeric excess was determined to be 90%.  $t_{\text{R}}$ (major) = 9.1 min  $t_{\text{R}}$ (minor) = 10.5 min.  $^1\text{H}$  NMR (500 MHz,  $\text{CDCl}_3$ ; compound exists as a 9.0:1 mixture of rotamers, the major rotamer is denoted by \*, minor rotamer denoted by <sup>§</sup>)  $\delta$  7.37 – 7.30 (m,



3H\*, 3H<sup>§</sup>), 7.24 – 7.20 (m, 2H<sup>§</sup>), 7.18 – 7.12 (m, 2H\*), 6.83 – 6.74 (m, 1H\*, 2H<sup>§</sup>), 6.71 (dd,  $J = 8.0, 2.6$  Hz, 1H\*), 6.23 (dd,  $J = 8.5, 4.0$  Hz, 1H<sup>§</sup>), 6.14 (dd,  $J = 8.5, 4.0$  Hz, 1H\*), 5.60 (s, 1H\*), 5.29 (d,  $J = 1.7$  Hz, 1H<sup>§</sup>), 5.14 (dd,  $J = 9.6, 5.0$  Hz, 1H<sup>§</sup>), 5.06 (d,  $J = 12.2$  Hz, 1H<sup>§</sup>), 4.97 (d,  $J = 12.2$  Hz, 1H<sup>§</sup>), 4.79 (d,  $J = 8.5$  Hz, 1H\*), 4.70 (d,  $J = 12.0$  Hz, 1H\*), 4.50 (d,  $J = 12.1$  Hz, 1H\*), 2.93 (s, 3H\*), 2.78 (d,  $J = 13.1$  Hz, 1H\*), 2.60 (d,  $J = 1.3$  Hz, 3H<sup>§</sup>), 2.45 (dd,  $J = 13.3, 5.0$  Hz, 1H<sup>§</sup>), 2.37 (dd,  $J = 13.1, 8.5$  Hz, 1H\*), 2.26 (dd,  $J = 13.4, 9.7$  Hz, 1H<sup>§</sup>), 1.44 (s, 3H\*), 1.41 (s, 3H<sup>§</sup>); <sup>13</sup>C NMR (125 MHz, CDCl<sub>3</sub>; compound exists as a 9.0:1 mixture of rotamers, the major rotamer is denoted by \*, minor rotamer denoted by <sup>§</sup>) δ 169.2<sup>§</sup>, 169.0\*, 156.9\* (q,  $J_{C-F} = 36.7$  Hz), 156.3\* (q,  $J_{C-F} = 235.3$  Hz), 146.5\*, 144.7<sup>§</sup>, 135.2<sup>§</sup>, 134.5\*, 133.3\* (d,  $J_{C-F} = 7.2$  Hz), 128.5\*, 128.4\*, 128.2<sup>§</sup>, 116.1\* (q,  $J_{C-F} = 288.6$  Hz), 115.0\* (d,  $J_{C-F} = 23.0$  Hz), 114.5<sup>§</sup> (d,  $J_{C-F} = 23.1$  Hz), 110.2\* (d,  $J_{C-F} = 24.4$  Hz), 109.6\* (d,  $J_{C-F} = 24.6$  Hz), 107.3<sup>§</sup> (d,  $J_{C-F} = 7.7$  Hz), 106.0\* (d,  $J_{C-F} = 7.9$  Hz), 91.3<sup>§</sup>, 89.1\*, 67.8\*, 67.3<sup>§</sup>, 60.4<sup>§</sup>, 60.2\*, 52.2<sup>§</sup>, 50.4\*, 42.8<sup>§</sup>, 40.9<sup>§</sup>, 32.4\*, 31.5<sup>§</sup>, 25.1\*, 22.3<sup>§</sup>; IR (NaCl/thin film): 2961, 1749, 1698, 1498, 1439, 1270, 1207, 1157, 995, 852, 752 cm<sup>-1</sup>;  $[\alpha]_D^{25} = +156.8$  (c 1.16, CH<sub>2</sub>Cl<sub>2</sub>); HRMS (ESI) calc'd for [M+H]<sup>+</sup> 437.1483, found 437.1490.

### Pyrroloindoline 13c.

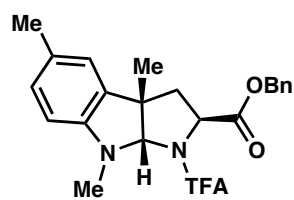

(a) *exo* diastereomer

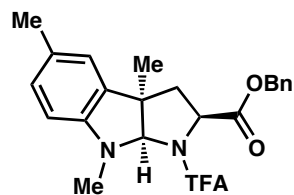

(b) *endo* diastereomer

Prepared from 5-methyl-1,3-dimethyl-1*H*-indole **12c** and benzyl 2-trifluoroacetamidoacrylate using general procedure C. The reaction was allowed to run for 4 h. The crude residue was purified by flash chromatography (5→15% ethyl acetate/hexanes) to yield 72.9 mg (84% yield) of **13c** in a 5:1 ratio of diastereomers (determined by <sup>1</sup>H NMR analysis of the purified product). The diastereomers were separated by preparatory HPLC (0→10% ethyl acetate/hexanes).

*Exo* diastereomer: pale yellow oil. The enantiomeric excess was determined to be 94% by chiral SFC analysis (OJ-H, 2.5 mL/min, 2% IPA in CO<sub>2</sub>, λ = 254 nm):  $t_R$ (major) = 20.5 min  $t_R$ (minor) = 16.6 min. <sup>1</sup>H NMR (400

MHz, CDCl<sub>3</sub>; compound exists as a 2.0:1 mixture of rotamers, the major rotamer is denoted by \*, minor rotamer denoted by <sup>§</sup>) δ 7.39 (br s, 5H\*, 5H<sup>§</sup>), 6.97 (br d,  $J = 7.7$  Hz, 1H\*, 1H<sup>§</sup>), 6.85 (br s, 1H<sup>§</sup>), 6.81 (br s, 1H\*), 6.50 (br d,  $J = 7.6$  Hz, 1H<sup>§</sup>), 6.42 (br d,  $J = 7.9$  Hz, 1H\*), 5.56 (br s, 1H\*), 5.32 – 5.15 (br m, 2H\*, 3H<sup>§</sup>), 4.76 (br d,  $J = 9.3$  Hz, 1H\*), 4.47 (br t,  $J = 7.5$  Hz, 1H<sup>§</sup>), 3.05 (br s, 3H\*), 2.87 (br s, 3H<sup>§</sup>), 2.61 – 2.46 (m, 1H\*, 1H<sup>§</sup>), 2.30 (d,  $J = 21.3$  Hz, 1H\*), 2.27 (s, 3H\*, 3H<sup>§</sup>), 2.09 – 1.98 (br m, 1H<sup>§</sup>), 1.45 (br s, 3H<sup>§</sup>), 1.26 (s, 3H<sup>§</sup>); <sup>13</sup>C NMR (100 MHz, CDCl<sub>3</sub>; compound exists as a 2.0:1 mixture of rotamers, the major rotamer is denoted by \*, minor rotamer denoted by <sup>§</sup>) δ 172.0\*, 169.9<sup>§</sup>, 159.1\* (q,  $J_C$

$f = 36.8$  Hz),  $157.7^{\S}$  (q,  $J_{C-F} = 37.9$  Hz),  $147.3^{*\S}$ ,  $135.2^{\S}$ ,  $134.6^*$ ,  $134.5^*$ ,  $134.4^{\S}$ ,  $129.7^{\S}$ ,  $129.2^{\S}$ ,  $129.0^*$ ,  $128.8^*$ ,  $128.8^*$ ,  $128.7^*$ ,  $128.6^*$ ,  $128.4^*$ ,  $128.2^{\S}$ ,  $122.3^{*\S}$ ,  $116.1^*$  (q,  $J_{C-F} = 288.7$  Hz),  $110.0^{\S}$ ,  $108.2^*$ ,  $93.8^*$ ,  $92.1^{\S}$ ,  $68.0^*$ ,  $67.3^{\S}$ ,  $61.4^{\S}$ ,  $60.4^*$ ,  $53.3^{\S}$ ,  $49.2^*$ ,  $43.9^*$ ,  $40.2^{\S}$ ,  $37.4^*$ ,  $35.6^{\S}$ ,  $23.4^*$ ,  $23.2^{\S}$ ,  $20.7^{*\S}$ ; IR (NaCl/thin film): 2965, 1748, 1697, 1499, 1456, 1433, 1348, 1194, 1153, 992, 754  $\text{cm}^{-1}$ ;  $[\alpha]_D^{25} = -87.1$  (c 0.90,  $\text{CH}_2\text{Cl}_2$ ); HRMS (APCI) calc'd for  $[\text{M}+\text{H}]^+$  433.1734, found 433.1713.

*Endo diastereomer*: pale yellow oil. The enantiomeric excess was determined to be 91% by chiral HPLC analysis (OD-H, 1 mL/min, 3% IPA in hexanes,  $\lambda = 254$  nm):  $t_R(\text{major}) = 6.5$  min  $t_R(\text{minor}) = 7.3$  min.  $^1\text{H}$  NMR (300 MHz,  $\text{CDCl}_3$ ; compound exists as a 6.7:1 mixture of rotamers, the major rotamer is denoted by \*, minor rotamer denoted by  $^{\S}$ )  $\delta$  7.40 – 7.29 (m,  $3\text{H}^*$ ,  $3\text{H}^{\S}$ ), 7.23 – 7.18 (m,  $2\text{H}^{\S}$ ), 7.18 – 7.10 (m,  $2\text{H}^*$ ), 6.96 – 6.84 (m,  $1\text{H}^*$ ,  $2\text{H}^{\S}$ ), 6.81 (br s,  $1\text{H}^*$ ), 6.27 (d,  $J = 7.9$  Hz,  $1\text{H}^{\S}$ ), 6.18 (d,  $J = 7.9$  Hz,  $1\text{H}^*$ ), 5.57 (s,  $1\text{H}^*$ ), 5.25 (br d,  $J = 1.9$  Hz,  $1\text{H}^{\S}$ ), 5.12 (dd,  $J = 9.6, 5.4$  Hz,  $1\text{H}^{\S}$ ), 5.05 (d,  $J = 12.4$  Hz,  $1\text{H}^{\S}$ ), 4.94 (d,  $J = 12.2$  Hz,  $1\text{H}^{\S}$ ), 4.78 (d,  $J = 8.4$  Hz,  $1\text{H}^*$ ), 4.63 (d,  $J = 12.2$  Hz,  $1\text{H}^*$ ), 4.41 (d,  $J = 12.2$  Hz,  $1\text{H}^*$ ), 2.92 (s,  $3\text{H}^*$ ), 2.82 (d,  $J = 13.0$  Hz,  $1\text{H}^*$ ), 2.61 (d,  $J = 1.4$  Hz,  $3\text{H}^{\S}$ ), 2.44 (dd,  $J = 13.3, 5.3$  Hz,  $1\text{H}^{\S}$ ), 2.37 (dd,  $J = 13.0, 8.4$  Hz,  $1\text{H}^*$ ), 2.26 (s,  $3\text{H}^{\S}$ ), 2.23 (s,  $3\text{H}^*$ ), 1.44 (s,  $3\text{H}^*$ ), 1.41 (s,  $3\text{H}^{\S}$ );  $^{13}\text{C}$  NMR (125 MHz,  $\text{CDCl}_3$ ; compound exists as a 6.7:1 mixture of rotamers, the major rotamer is denoted by \*, minor rotamer denoted by  $^{\S}$ )  $\delta$  169.4 $^{\S}$ , 169.2\*, 156.9\* (q,  $J_{C-F} = 36.6$  Hz), 148.2\*, 135.3 $^{\S}$ , 134.7\*, 133.3 $^{\S}$ , 132.0\*, 129.3\*, 128.9 $^{\S}$ , 128.5 $^{\S}$ , 128.5\*, 128.4\*, 128.3 $^{\S}$ , 128.2\*, 128.1 $^{\S}$ , 126.9 $^{*\S}$ , 123.2\*, 122.5 $^{\S}$ , 116.2\* (q,  $J_{C-F} = 288.8$  Hz), 107.0 $^{\S}$ , 105.9\*, 91.3 $^{\S}$ , 89.0\*, 67.6\*, 67.2 $^{\S}$ , 60.5 $^{\S}$ , 60.2\*, 52.2 $^{\S}$ , 50.4\*, 42.9\*, 41.1 $^{\S}$ , 32.2\*, 31.4 $^{\S}$ , 25.2 $^{*\S}$ , 22.2 $^{\S}$ , 20.7\*; IR (NaCl/thin film): 2958, 1752, 1698, 1619, 1505, 1443, 1210, 1158, 995, 851, 752  $\text{cm}^{-1}$ ;  $[\alpha]_D^{25} = +176.4$  (c 0.97,  $\text{CH}_2\text{Cl}_2$ ); HRMS (ESI) calc'd for  $[\text{M}+\text{H}]^+$  433.1734, found 433.1737.

### Pyrroloindoline 13d.

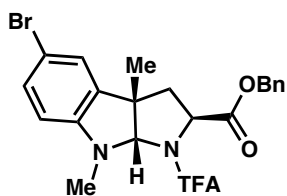

(a) *exo* diastereomer

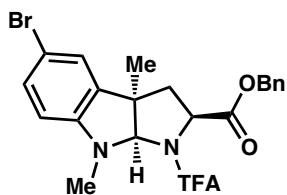

(b) *endo* diastereomer

Prepared from 5-bromo-1,3-dimethyl-1*H*-indole (**12d**) and benzyl 2-trifluoroacetamidoacrylate (**11**) using general procedure C, in DCE with 1.6 equivalents  $\text{SnCl}_4$ . The reaction was allowed to run for 57 h. The crude residue was purified by flash chromatography (0→5% ethyl acetate/hexanes) to yield 50 mg (51% yield) of **13d** in a 3:1 ratio of diastereomers (determined by  $^1\text{H}$  NMR analysis of the pure product). The diastereomers were separated by preparatory HPLC (0→10% ethyl acetate/hexanes).

*Exo diastereomer:* The enantiomeric excess was determined to be 87% by chiral HPLC analysis (OD-H, 2.5 mL/min, 5% IPA in hexanes,  $\lambda = 254$  nm):  $t_R(\text{major}) = 14.7$  min  $t_R(\text{minor}) = 12.5$  min.  $^1\text{H}$  NMR (500 MHz,  $\text{CDCl}_3$ ; compound exists as a 3.0:1 mixture of rotamers, the major rotamer is denoted by \*, minor rotamer denoted by  $^{\S}$ )  $\delta$  7.38 (br s, 5H\*, 5H $^{\S}$ ), 7.24 (br d,  $J = 8.3$  Hz, 1H\*, 1H $^{\S}$ ), 7.11 (br s, 1H $^{\S}$ ), 7.05 (br s, 1H\*), 6.41 (br d,  $J = 7.1$  Hz, 1H $^{\S}$ ), 6.35 (br d,  $J = 8.3$  Hz, 1H\*), 5.60 (br s, 1H\*), 5.34 (br s, 1H $^{\S}$ ), 5.28 – 5.15 (m, 2H\*, 2H $^{\S}$ ), 4.74 (br d,  $J = 9.0$  Hz, 1H\*), 4.50 (br t,  $J = 7.0$  Hz, 1H $^{\S}$ ), 3.03 (br s, 3H\*), 2.83 (br s, 3H $^{\S}$ ), 2.53 (br dd,  $J = 12.9, 10.2$  Hz, 1H\*), 2.47 (br t,  $J = 11.1$  Hz, 1H $^{\S}$ ), 2.30 (br d,  $J = 13.4$  Hz, 1H\*), 2.02 (br dd,  $J = 12.2, 6.5$  Hz, 1H $^{\S}$ ), 1.45 (br s, 1H $^{\S}$ ), 1.23 (br s, 3H\*);  $^{13}\text{C}$  NMR (125 MHz,  $\text{CDCl}_3$ ; compound exists as a 3.0:1 mixture of rotamers, the major rotamer is denoted by \*, minor rotamer denoted by  $^{\S}$ )  $\delta$  171.9\*, 169.6 $^{\S}$ , 159.18 (q,  $J_{\text{C-F}} = 37.1$  Hz)\*, 157.42 (d,  $J_{\text{C-F}} = 39.7$  Hz) $^{\S}$ , 148.4\*, 148.0 $^{\S}$ , 136.4\*, 136.2 $^{\S}$ , 135.0 $^{\S}$ , 134.5\*, 131.5 $^{\S}$ , 131.4\*, 128.9\*, 128.8\*, 128.7\*, 128.4 $^{\S}$ , 124.7\*, 116.0 (q,  $J_{\text{C-F}} = 288.5$  Hz)\*, 111.5 $^{\S}$ , 110.5\*, 110.2 $^{\S}$ , 109.4\*, 93.1\*, 91.5 $^{\S}$ , 68.2\*, 67.5 $^{\S}$ , 61.4 $^{\S}$ , 60.2\*, 52.9 $^{\S}$ , 49.1\*, 43.7\*, 40.4 $^{\S}$ , 36.7\*, 33.9 $^{\S}$ , 23.2\*, 22.3 $^{\S}$ ; IR (NaCl/thin film): 3034, 2965, 2931, 1747, 1698, 1602, 1489, 1205, 1154, 806, 751  $\text{cm}^{-1}$ ;  $[\alpha]_{\text{D}}^{25} -86.4^\circ$  (c = 0.60,  $\text{CH}_2\text{Cl}_2$ ); HRMS (FAB+) calc'd for  $[\text{M}+\text{H}]^+$  498.0589, found 498.0576.

*Endo diastereomer:* The enantiomeric excess was determined to be 85% by chiral HPLC analysis (OD-H, 2.5 mL/min, 5% IPA in hexanes,  $\lambda = 254$  nm):  $t_R(\text{major}) = 7.3$  min  $t_R(\text{minor}) = 8.1$  min.  $^1\text{H}$  NMR (400 MHz,  $\text{CDCl}_3$ ; compound exists as a 12.5:1 mixture of rotamers, the major rotamer is denoted by \*, minor rotamer denoted by  $^{\S}$ )  $\delta$  7.39 – 7.30 (m, 3H\*, 3H $^{\S}$ ), 7.23 – 7.13 (m, 3H\*, 3H $^{\S}$ ), 7.11 (s, 1H $^{\S}$ ), 7.08 (s, 1H\*), 6.19 (d,  $J = 8.5$  Hz, 1H $^{\S}$ ), 6.13 (d,  $J = 8.3$  Hz, 1H\*), 5.59 (s, 1H\*), 5.33 (s, 1H $^{\S}$ ), 5.14 (dd,  $J = 10.0, 4.9$  Hz, 1H $^{\S}$ ), 5.06 (d,  $J = 11.9$  Hz, 1H $^{\S}$ ), 4.93 (dd,  $J = 11.9$  Hz, 1H $^{\S}$ ), 4.79 (d,  $J = 8.4$  Hz, 1H\*), 4.64 (d,  $J = 12.0$  Hz, 1H\*), 4.56 (d,  $J = 12.0$ , 1H\*), 2.94 (s, 3H\*), 2.78 (d,  $J = 13.2$  Hz, 1H\*), 2.61 (s, 3H $^{\S}$ ), 2.45 (dd,  $J = 13.7, 3.9$  Hz, 1H $^{\S}$ ), 2.37 (dd,  $J = 13.1, 8.4$  Hz, 1H\*), 2.26 (dd,  $J = 14.3, 9.9$  Hz, 1H $^{\S}$ ), 1.44 (s, 3H\*), 1.41 (s, 3H $^{\S}$ );  $^{13}\text{C}$  NMR (125 MHz,  $\text{CDCl}_3$ ; compound exists as a 12.5:1 mixture of rotamers, the major rotamer is denoted by \*, minor rotamer denoted by  $^{\S}$ )  $\delta$  169.0\*, 156.9 (q,  $J_{\text{C-F}} = 37.0$  Hz)\*, 149.4\*, 134.4\*, 134.2\*, 131.8\*, 131.4 $^{\S}$ , 125.5\*, 124.9 $^{\S}$ , 116.1 (q,  $J_{\text{C-F}} = 288.6$  Hz)\*, 108.9\*, 108.3 $^{\S}$ , 107.5 $^{\S}$ , 107.3\*, 90.6 $^{\S}$ , 88.5\*, 67.9\*, 67.4 $^{\S}$ , 60.4 $^{\S}$ , 60.2\*, 50.4\*, 42.8\*, 41.1 $^{\S}$ , 32.1\*, 25.3\*, 22.5 $^{\S}$ ; IR (NaCl/thin film): 3034, 2962, 2930, 1749, 1698, 1602, 1493, 1442, 1261, 1211, 1151, 804, 750  $\text{cm}^{-1}$ ;  $[\alpha]_{\text{D}}^{25} + 156.3^\circ$  (c = 0.24,  $\text{CH}_2\text{Cl}_2$ ); HRMS (FAB+) calc'd for  $[\text{M}+\text{H}]^+$  498.0589, found 498.0606.

### Pyrroloindoline 13e.

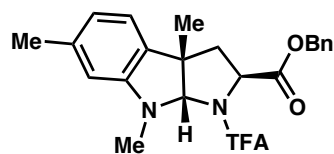

(a) *exo* diastereomer

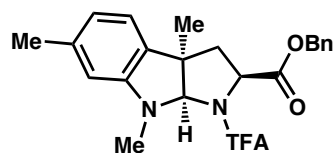

(b) *endo* diastereomer

Prepared from 6-methyl-1,3-dimethyl-1*H*-indole **12e** and benzyl 2-trifluoroacetamidoacrylate using general procedure C. The reaction was allowed to run for 6 h. The crude residue was purified by flash chromatography (0→10% ethyl acetate/hexanes) to yield 78.3 mg (91% yield) of **13e** in a 4:1 ratio of diastereomers (determined by <sup>1</sup>H NMR analysis of the purified product). The diastereomers were separated by preparatory HPLC (0→10% ethyl acetate/hexanes). The enantiomeric excesses of both diastereomers were determined by chiral HPLC analysis (OD-H, 1 mL/min, 3% IPA in hexanes, λ = 254 nm).

*Exo diastereomer*: pale yellow oil. The enantiomeric excess was determined to be 94%.  $t_R(\text{major}) = 14.5$  min  $t_R(\text{minor}) = 12.9$  min. <sup>1</sup>H NMR (500 MHz, CDCl<sub>3</sub>; compound exists as a 2.2:1 mixture of rotamers, the major rotamer is denoted by \*, minor rotamer denoted by §) δ 7.40 (br s, 5H\*, 5H<sup>§</sup>), 6.93 (br d,  $J = 7.1$  Hz, 1H<sup>§</sup>), 6.89 (br d,  $J = 7.4$  Hz, 1H\*), 6.65 (br d,  $J = 6.8$  Hz, 1H<sup>§</sup>), 6.58 (br d,  $J = 7.3$  Hz, 1H\*), 6.42 (br s, 1H<sup>§</sup>), 6.35 (br s, 1H\*), 5.60 (br s, 1H\*), 5.32 (br s, 1H<sup>§</sup>), 5.29 – 5.14 (m, 2H\*, 2H<sup>§</sup>), 4.76 (br d,  $J = 9.2$  Hz, 1H\*), 4.50 (br t,  $J = 7.2$  Hz, 1H<sup>§</sup>), 3.07 (br s, 3H\*), 2.88 (br s, 3H<sup>§</sup>), 2.61 – 2.42 (m, 1H\*, 1H<sup>§</sup>), 2.32 (br s,  $J = 5.8$  Hz, 4H\*, 3H<sup>§</sup>), 2.10 – 1.98 (m, 1H<sup>§</sup>), 1.46 (s, 3H<sup>§</sup>), 1.27 (s, 3H\*); <sup>13</sup>C NMR (125 MHz, CDCl<sub>3</sub>; compound exists as a 2.2:1 mixture of rotamers, the major rotamer is denoted by \*, minor rotamer denoted by §) δ 172.1\*, 169.9<sup>§</sup>, 159.2\* (q,  $J_{C-F} = 37.0$  Hz), 157.7<sup>§</sup> (q,  $J_{C-F} = 38.4$  Hz), 149.6\*, 149.5<sup>§</sup>, 139.0<sup>§</sup>, 138.8\*, 135.2<sup>§</sup>, 134.7\*, 131.7\*, 131.4<sup>§</sup>, 128.9\*, 128.8\*, 128.7\*, 128.6\*, 128.5<sup>§</sup>, 128.4<sup>§</sup>, 121.3<sup>§</sup>, 121.2\*, 120.7<sup>§</sup>, 119.3\*, 116.1\* (q,  $J_{C-F} = 288.4$  Hz), 116.0<sup>§</sup> (q,  $J_{C-F} = 286.5$  Hz), 110.5<sup>§</sup>, 108.9\*, 93.6\*, 92.0<sup>§</sup>, 68.1\*, 67.4<sup>§</sup>, 61.5<sup>§</sup>, 60.5\*, 52.9<sup>§</sup>, 49.0\*, 43.9\*, 40.4<sup>§</sup>, 36.8\*, 34.7<sup>§</sup>, 23.5\*, 23.0<sup>§</sup>, 21.7\*<sup>§</sup>; IR (NaCl/thin film): 2964, 1748, 1697, 1616, 1499, 1456, 1423, 1160, 1004, 752 cm<sup>-1</sup>;  $[\alpha]_D^{25} = -85.6$  (c 0.93, CH<sub>2</sub>Cl<sub>2</sub>); HRMS (EI+) calc'd for M<sup>+</sup> 432.1661, found 432.1663.

*Endo diastereomer*: pale yellow oil. The enantiomeric excess was determined to be 90%.  $t_R(\text{major}) = 7.8$  min  $t_R(\text{minor}) = 8.3$  min. <sup>1</sup>H NMR (500 MHz, CDCl<sub>3</sub>; compound exists as a 9.0:1 mixture of rotamers, the major rotamer is denoted by \*, minor rotamer denoted by §) δ 7.38 – 7.29 (m, 3H\*, 3H<sup>§</sup>), 7.21 (dd,  $J = 6.6, 2.9$  Hz, 2H<sup>§</sup>), 7.16 – 7.10 (m, 2H\*), 6.92 (d,  $J = 7.4$  Hz, 1H<sup>§</sup>), 6.86 (d,  $J = 7.4$  Hz, 1H\*), 6.55 (d,  $J = 7.4$  Hz, 1H<sup>§</sup>), 6.49 (dd,  $J = 7.4, 0.6$  Hz, 1H\*), 6.17 (s, 1H<sup>§</sup>), 6.06 (s, 1H\*), 5.57 (s, 1H\*), 5.28 (d,  $J = 1.9$  Hz, 1H<sup>§</sup>), 5.12 (dd,  $J = 9.6, 5.2$  Hz, 1H<sup>§</sup>), 5.03 (d,  $J = 12.3$  Hz, 1H<sup>§</sup>), 4.95 (d,  $J = 12.3$  Hz, 1H<sup>§</sup>), 4.78 (d,  $J = 8.4$  Hz, 1H\*), 4.67 (d,  $J = 12.1$  Hz, 1H\*), 4.33 (d,  $J = 12.2$  Hz, 1H\*),

2.91 (s, 3H\*), 2.82 (d,  $J = 12.9$  Hz, 1H\*), 2.62 (d,  $J = 1.4$  Hz, 3H<sup>§</sup>), 2.43 (dd,  $J = 13.3, 5.2$  Hz, 1H<sup>§</sup>), 2.36 (dd,  $J = 12.9, 8.3$  Hz, 1H\*), 2.30 (s, 3H<sup>§</sup>), 2.28 (s, 3H\*), 2.24 (dd,  $J = 13.3, 9.6$  Hz, 1H<sup>§</sup>), 1.43 (s, 3H\*), 1.40 (s, 3H<sup>§</sup>); <sup>13</sup>C NMR (125 MHz, CDCl<sub>3</sub>; compound exists as a 9.0:1 mixture of rotamers, the major rotamer is denoted by \*, minor rotamer denoted by <sup>§</sup>)  $\delta$  169.4<sup>§</sup>, 169.3\*, 156.9\* (q,  $J_{C-F} = 36.8$  Hz), 150.4\*, 148.7<sup>§</sup>, 139.0\*, 138.7<sup>§</sup>, 135.2<sup>§</sup>, 134.7\*, 130.3<sup>§</sup>, 129.0\*, 128.5<sup>§</sup>, 128.4\*, 128.4\*, 128.3<sup>§</sup>, 128.2\*, 122.3\*, 121.3<sup>§</sup>, 119.1<sup>§</sup>, 118.4\*, 116.2\* (q,  $J_{C-F} = 288.7$  Hz), 108.0<sup>§</sup>, 106.8\*, 91.1<sup>§</sup>, 88.9\*, 67.6\*, 67.2<sup>§</sup>, 60.5<sup>§</sup>, 60.3\*, 52.0<sup>§</sup>, 50.2\*, 42.9\*, 41.1<sup>§</sup>, 32.0\*, 31.0<sup>§</sup>, 25.3\*<sup>§</sup>, 22.4<sup>§</sup>, 21.8\*; IR (NaCl/thin film): 2923, 1740, 1698, 1612, 1501, 1440, 1214, 1150, 1011, 849, 746 cm<sup>-1</sup>;  $[\alpha]_D^{25} = +165.5$  ( $c$  0.53, CH<sub>2</sub>Cl<sub>2</sub>); HRMS (ESI) calc'd for [M+H]<sup>+</sup> 433.1739, found 433.1756.

### Pyrroloindoline **13f**.

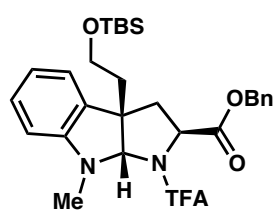

(a) *exo* diastereomer

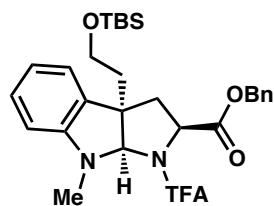

(b) *endo* diastereomer

Prepared from 1-methyl-3-*t*-butyldimethylsilyloxyethyl-1*H*-indole (**12f**) and benzyl 2-trifluoroacetamidoacrylate (**11**) using general procedure C. The reaction was allowed to run for 20 h. The crude residue was purified by flash chromatography (0→5% ethyl acetate/hexanes) to yield 61 mg (54% yield) of **13f** in a 6:1 ratio of diastereomers (determined by <sup>1</sup>H NMR analysis of the purified product). The diastereomers were separated by preparatory HPLC (0→5% ethyl acetate/hexanes).

*Exo diastereomer*: The enantiomeric excess was determined to be 92% by chiral HPLC analysis (OD-H, 1 mL/min, 0.6% EtOH in hexanes,  $\lambda = 254$  nm):  $t_R$ (major) = 10.7 min  $t_R$ (minor) = 12.1 min. <sup>1</sup>H NMR (500 MHz, CDCl<sub>3</sub>;

compound exists as a 1.7:1 mixture of rotamers, the major rotamer is denoted by \*, minor rotamer denoted by <sup>§</sup>)  $\delta$  7.38 (br s, 5H\*, 5H<sup>§</sup>), 7.17 (t,  $J = 7.6$  Hz, 1H\*, 1H<sup>§</sup>), 7.00 (br d,  $J = 6.7$  Hz, 1H\*, 1H<sup>§</sup>), 6.87-6.78 (br m, 1H<sup>§</sup>), 6.76 (br t,  $J = 6.7$  Hz, 1H\*), 6.59 (br d,  $J = 6.0$  Hz, 1H<sup>§</sup>), 6.51 (br d,  $J = 7.4$  Hz, 1H\*), 5.89 (br s, 1H\*), 5.79 (br s, 1H<sup>§</sup>), 5.30 – 5.10 (m, 2H\*, 2H<sup>§</sup>), 4.61 (br s, 1H\*), 4.32 (br s, 1H<sup>§</sup>), 3.60 (br d,  $J = 22.3$  Hz, 2H<sup>§</sup>), 3.49 (br s, 2H\*), 3.10 (s, 3H\*), 2.94 (br s, 3H<sup>§</sup>), 2.74 – 2.64 (m, 1H\*), 2.63 – 2.52 (m, 1H<sup>§</sup>), 2.39 (br d,  $J = 10.1$  Hz, 1H\*), 2.18 (br t,  $J = 9.9$  Hz, 1H<sup>§</sup>), 1.97 (br s, 2H<sup>§</sup>), 1.82 (br td,  $J = 13.6, 7.9$  Hz, 2H\*), 0.86 (br s, 9H\*, 9H<sup>§</sup>), 0.02 – -0.06 (m, 6H\*, 6H<sup>§</sup>); <sup>13</sup>C NMR (100 MHz, CDCl<sub>3</sub>; compound exists as a 1.7:1 mixture of rotamers, the major rotamer is denoted by \*, minor rotamer denoted by <sup>§</sup>)  $\delta$  172.0\*, 169.9<sup>§</sup>, 159.0 (q,  $J_{C-F} = 37.9$  Hz)\*, 157.7 (q,  $J_{C-F} = 38.1$  Hz)<sup>§</sup>, 150.5<sup>§</sup>, 150.0\*, 135.2<sup>§</sup>, 134.7\*, 131.7<sup>§</sup>, 131.5\*, 128.8\*<sup>§</sup>, 128.6\*<sup>§</sup>, 128.4\*<sup>§</sup>, 122.4\*<sup>§</sup>, 119.9<sup>§</sup>, 118.4\*, 116.0 (q,  $J_{C-F} = 288.0$  Hz)\*, 110.0<sup>§</sup>, 108\*, 90.8\*, 89.5<sup>§</sup>, 67.9\*, 67.3<sup>§</sup>, 60.5<sup>§</sup>, 59.6\*, 56.4<sup>§</sup>, 52.3\*, 43.5\*, 39.9<sup>§</sup>, 39.1<sup>§</sup>,

39.0\*, 36.4\*, 35.7<sup>§</sup>, 25.8\*, 18.1<sup>§</sup>, -5.6\*<sup>§</sup>; IR (NaCl/thin film): 3035, 2955, 2930, 2857, 2884, 1750, 1694, 1492, 1432, 1257, 1201, 1158, 1106, 837 cm<sup>-1</sup>; [ $\alpha$ ]<sub>D</sub><sup>25</sup> = -95.3° (c = 1.38, CH<sub>2</sub>Cl<sub>2</sub>); HRMS (FAB+) calc'd for [M+H]<sup>+</sup> 562.2475, found 562.2468.

*Endo diastereomer*: The enantiomeric excess was determined to be 90% by chiral HPLC analysis (AD-H, 1 mL/min, 0.5% EtOH in hexanes,  $\lambda$  = 254 nm):  $t_R$ (major) = 6.5 min  $t_R$ (minor) = 5.8 min. <sup>1</sup>H NMR (500 MHz, CDCl<sub>3</sub>; compound exists as a 16.7:1 mixture of rotamers, the major rotamer is denoted by \*, minor rotamer denoted by <sup>§</sup>)  $\delta$  7.38 – 7.29 (m, 3H\*, 3H<sup>§</sup>), 7.20 – 7.07 (m, 3H\*, 3H<sup>§</sup>), 6.96 (d,  $J$  = 7.2 Hz, 1H\*, 1H<sup>§</sup>), 6.69 (t,  $J$  = 7.5 Hz, 1H<sup>§</sup>), 6.65 (t,  $J$  = 7.4 Hz, 1H\*), 6.27 (d,  $J$  = 8.2 Hz, 1H<sup>§</sup>), 6.25 (d,  $J$  = 7.9 Hz, 1H\*), 5.90 (s, 1H<sup>§</sup>), 5.83 (s, 1H\*), 5.12 (dd,  $J$  = 9.3, 3.0 Hz, 1H<sup>§</sup>), 4.86 (d, 12.2 Hz, 1H<sup>§</sup>), 4.79 (d,  $J$  = 12.2 Hz, 1H<sup>§</sup>), 4.77 (d,  $J$  = 8.2 Hz, 1H\*), 4.60 (d,  $J$  = 12.1 Hz, 1H\*), 4.33 (d,  $J$  = 12.2 Hz, 1H\*), 3.65 – 3.49 (m, 2H\*, 2H<sup>§</sup>), 2.92 (s, 3H\*), 2.88 (d,  $J$  = 13.1 Hz, 1H\*), 2.67 (s, 3H<sup>§</sup>), 2.58 (dd,  $J$  = 13.1, 3.3 Hz, 1H<sup>§</sup>), 2.49 (dd,  $J$  = 13.1, 8.4 Hz, 1H\*), 2.28 (dd,  $J$  = 13.7, 10.1 Hz, 1H<sup>§</sup>), 2.07 – 1.84 (m, 2H\*, 2H<sup>§</sup>), 0.87 (s, 9H\*), 0.80 (s, 9H<sup>§</sup>), 0.00 (d,  $J$  = 4.0 Hz, 6H\*), -0.09 (d,  $J$  = 13.9 Hz, 6H<sup>§</sup>); <sup>13</sup>C NMR (125 MHz, CDCl<sub>3</sub>; compound exists as a 16.7:1 mixture of rotamers, only the major rotamer is reported)  $\delta$  169.3, 156.8 (q,  $J_{C-F}$  = 37.9 Hz), 151.2, 134.7, 129.6, 129.2, 128.43, 128.37, 128.2, 123.5, 117.5, 116.2 (q,  $J_{C-F}$  = 289.0 Hz), 107.5, 105.9, 87.1, 67.5, 59.9, 59.4, 53.0, 42.2, 40.4, 31.9, 25.9, 18.2, -5.6 ( $J$  = 6.1 Hz); IR (NaCl/thin film): 3034, 2954, 2930, 2857, 1742, 1699, 1609, 1494, 1441, 1255, 1207, 1146, 1104, 837, 745 cm<sup>-1</sup>; [ $\alpha$ ]<sub>D</sub><sup>25</sup> +148.5° (c = 0.33, CH<sub>2</sub>Cl<sub>2</sub>); HRMS (FAB+) calc'd for [M+H]<sup>+</sup> 562.2475, found 562.2458.

### Pyrroloindoline 13g.

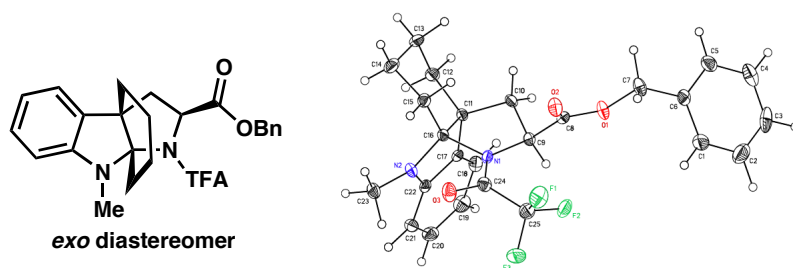

Prepared from 9-methyl-2,3,4,9-tetrahydro-1*H*-carbazole<sup>12</sup> and benzyl 2-trifluoroacetamidoacrylate (**11**) using general procedure C. The reaction was allowed to run for 11 h. The crude residue was purified by

<sup>12</sup> Pitts, M.R.; Harrison, J.R.; Moody, C.J. *J. Chem. Soc., Perkin Trans. 1* **2001**, 9, 955

flash chromatography (5→20% ethyl acetate/hexanes) to yield 60 mg (65% yield) of **13g** in a >18:1 ratio of diastereomers (determined by <sup>1</sup>H NMR analysis of the pure product). The diastereomers were separated by prep HPLC (0→10% ethyl acetate/hexanes).

*Exo diastereomer*: pale yellow oil. The oil was crystallized from ethyl acetate/hexanes to give crystals suitable for single crystal X-ray diffraction. The enantiomeric excess was determined to be 86% by chiral SFC analysis (OJ-H, 2.5 mL/min, 6% IPA in hexanes, λ = 254 nm): *t*<sub>R</sub>(major) = 4.5 min *t*<sub>R</sub>(minor) = 6.9 min. <sup>1</sup>H NMR (300 MHz, CDCl<sub>3</sub>; compound exists as a >20:1 mixture of rotamers) δ 7.44 – 7.29 (m, 5H), 7.16 (t, *J* = 7.2 Hz, 1H), 7.02 (d, *J* = 7.0 Hz, 1H), 6.72 (t, *J* = 7.4 Hz, 1H), 6.51 (d, *J* = 7.8 Hz, 1H), 5.20 (dd, *J* = 29.3, 12.1 Hz, 2H), 4.43 (t, *J* = 8.2 Hz, 1H), 3.20 (d, *J* = 15.5 Hz, 1H), 3.10 (s, 3H), 2.75 (dd, *J* = 13.0, 8.6 Hz, 1H), 2.28 (dd, *J* = 13.0, 9.3 Hz, 1H), 2.02 – 1.75 (m, 2H), 1.75 – 1.55 (m, *J* = 12.9 Hz, 1H), 1.53 – 1.38 (m, 1H), 1.36 – 1.07 (m, 3H); <sup>13</sup>C NMR (125 MHz, CDCl<sub>3</sub>; compound exists as a >20:1 mixture of rotamers) δ 172.4, 157.7 (q, *J*<sub>C-F</sub> = 36.3 Hz), 148.0, 134.9, 133.7, 128.7, 128.6, 128.4, 120.8, 118.0, 115.8 (q, *J*<sub>C-F</sub> = 289.8 Hz), 112.3, 107.1, 95.6, 67.6, 58.4 (q, *J*<sub>C-F</sub> = 3.5 Hz), 52.3, 35.2, 33.9, 30.7, 26.8, 21.5, 20.4; IR (NaCl/thin film): 3034, 2928, 2857, 1749, 1693, 1609, 1490, 1214, 1186, 1160, 741 cm<sup>-1</sup>; melting point: 106 – 108 °C; [α]<sub>D</sub><sup>25</sup> = -92.6° (c = 1.40, CH<sub>2</sub>Cl<sub>2</sub>); HRMS (ESI+) calc'd for [M+H]<sup>+</sup> 459.1890, found 459.1892.

### Pyrrolidinoindoline **13h**.

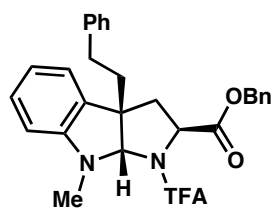

(a) *exo* diastereomer

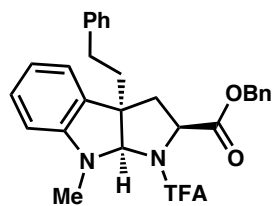

(b) *endo* diastereomer

Prepared from 3-phenethyl-1-methyl-1*H*-indole<sup>13</sup> and benzyl 2-trifluoroacetamidoacrylate (**11**) using general procedure C, with 1.6 equivalents SnCl<sub>4</sub>. The reaction was allowed to run for 9.5 h. The crude residue was purified by flash chromatography (5→20% ethyl acetate/hexanes) to yield 81 mg (80% yield) of **13h** in a 4:1 ratio of diastereomers (determined by <sup>1</sup>H NMR analysis of the crude reaction mixture). The diastereomers were separated by preparatory HPLC (0→6% ethyl acetate/hexanes). The enantiomeric excess of both diastereomers was determined by chiral SFC analysis (OJ-H, 2.5 mL/min, 6% IPA in hexanes, λ = 254 nm).

*Exo diastereomer*: pale yellow oil. The enantiomeric excess was determined to be 92%. *t*<sub>R</sub>(major) = 33.3 min *t*<sub>R</sub>(minor) = 28.0 min. <sup>1</sup>H NMR (500 MHz, CDCl<sub>3</sub>; compound exists as a 2.6:1 mixture of rotamers, the major rotamer is denoted by \*, minor rotamer denoted by §) δ

<sup>13</sup> Ferreira, E. PhD. Dissertation, California Institute of Technology, 2005.

$^1\text{H}$  NMR (500 MHz,  $\text{CDCl}_3$ )  $\delta$  7.39 – 7.28 (m, 5H\*, 5H $^\S$ ), 7.28 – 7.16 (m, 4H\*, 4H $^\S$ ), 7.12 – 7.06 (br s, 3H $^\S$ ), 7.02 (m, 3H\*), 6.90-6.81 (br s, 1H $^\S$ ), 6.81 (t,  $J = 6.9$  Hz, 1H\*), 6.63 – 6.57 (m,  $J = 9.8$  Hz, 1H $^\S$ ), 6.55 (br d,  $J = 7.5$  Hz, 1H\*), 5.70 (br s, 1H\*), 5.45 (br s, 1H $^\S$ ), 5.25-5.15 (m, 2H\*, 2H $^\S$ ), 4.69 (br d,  $J = 7.4$  Hz, 1H\*), 4.39 (br s, 1H $^\S$ ), 3.12 (br s, 3H\*), 2.90 (br s, 3H $^\S$ ), 2.78 – 1.73 (m, 6H\*, 6H $^\S$ );  $^{13}\text{C}$  NMR (125 MHz,  $\text{CDCl}_3$ ; compound exists as a 2.6:1 mixture of rotamers, the major rotamer is denoted by \*, minor rotamer denoted by  $^\S$ )  $\delta$  172.0\*, 169.8 $^\S$ , 159.0 (q,  $J_{\text{C-F}} = 36.7$  Hz)\*, 157.60 (q,  $J_{\text{C-F}} = 32.9$  Hz) $^\S$ , 150.3\* $^\S$ , 141.0\* $^\S$ , 135.1 $^\S$ , 134.5\*, 132.0\*, 131.6 $^\S$ , 129.1 $^\S$ , 128.9 $^\S$ , 128.8 $^\S$ , 128.7\*, 128.4\*, 128.2\*, 126.0\* $^\S$ , 122.3 $^\S$ , 121.9\*, 120.1 $^\S$ , 118.9\*, 116.0 (q,  $J_{\text{C-F}} = 288.4$  Hz)\*, 109.7 $^\S$ , 108.3\*, 90.4\*, 89.2 $^\S$ , 68.1\*, 67.4 $^\S$ , 60.7 $^\S$ , 59.5\*, 57.5 $^\S$ , 53.7\*, 43.5\*, 40.0 $^\S$ , 39.0\*, 38.6 $^\S$ , 36.9\*, 35.1 $^\S$ , 31.9\* $^\S$ ; IR (NaCl/thin film): 3030, 2921, 2852, 1747, 1694, 1607, 1492, 1455, 1433, 1190, 1152, 750  $\text{cm}^{-1}$ ;  $[\alpha]_{\text{D}}^{25} -113.8^\circ$  (c = 1.17,  $\text{CH}_2\text{Cl}_2$ ); HRMS (ESI) calc'd for  $[\text{M}+\text{H}]^+$  509.2047, found 509.2052.

*Endo diastereomer*: pale yellow oil. The enantiomeric excess was determined to be 90%.  $t_{\text{R}}$ (major) = 11.6 min  $t_{\text{R}}$ (minor) = 17.5 min.  $^1\text{H}$  NMR (500 MHz,  $\text{CDCl}_3$ ; compound exists as a 14.5:1 mixture of rotamers, the major rotamer is denoted by \*, minor rotamer denoted by  $^\S$ )  $\delta$  7.37 – 7.30 (m, 3H\*, 3H $^\S$ ), 7.23 (d,  $J = 7.6$  Hz, 2H\*, 2H $^\S$ ), 7.19 – 7.12 (m, 4H\*, 4H $^\S$ ), 7.07 (d,  $J = 7.3$  Hz, 2H\*, 2H $^\S$ ), 7.03 (d,  $J = 7.2$  Hz, 1H\*, 1H $^\S$ ), 6.76 (t,  $J = 7.3$  Hz, 1H $^\S$ ), 6.71 (t,  $J = 7.3$  Hz, 1H\*), 6.33 (d,  $J = 7.8$  Hz, 1H $^\S$ ), 6.28 (d,  $J = 7.8$  Hz, 1H\*), 5.70 (s, 1H\*), 5.49 (s, 1H $^\S$ ), 5.13 (dd,  $J = 9.4, 3.5$  Hz, 1H $^\S$ ), 4.91 (d,  $J = 12.2$  Hz, 1H $^\S$ ), 4.83 (d,  $J = 12.2$  Hz, 1H $^\S$ ), 4.80 (d,  $J = 8.2$  Hz, 1H\*), 4.63 (d,  $J = 12.1$  Hz, 1H\*), 4.37 (d,  $J = 12.1$  Hz, 1H\*), 2.94 (s, 3H\*), 2.86 (d,  $J = 12.9$  Hz, 1H\*), 2.65 (s, 3H $^\S$ ), 2.59 (td,  $J = 12.9, 5.3$  Hz, 1H\*), 2.53 – 2.46 (m, 1H $^\S$ ), 2.45 – 2.32 (m, 2H\*), 2.27 (dd,  $J = 13.2, 9.6$  Hz, 1H $^\S$ ), 2.23 – 2.18 (m, 1H $^\S$ ), 2.15 – 1.89 (m, 2H\*, 2H $^\S$ );  $^{13}\text{C}$  NMR (125 MHz,  $\text{CDCl}_3$ ; compound exists as a 14.5:1 mixture of rotamers, only the major rotamer is reported)  $\delta$  169.2, 156.8 (q,  $J_{\text{C-F}} = 36.9$  Hz), 151.3, 141.2, 134.7, 129.6, 129.4, 128.5, 128.43, 128.41, 128.3, 128.2, 126.0, 123.1, 117.8, 116.2 (q,  $J = 288.9$  Hz), 105.9, 86.9, 67.7, 60.0 (q,  $J_{\text{C-F}} = 3.2$  Hz). 54.3, 47.5, 42.2, 41.0, 31.9, 31.1; IR (NaCl/thin film): 2919, 2850, 1738, 1694, 1607, 1493, 1455, 1441, 1204, 1142, 744  $\text{cm}^{-1}$ ;  $[\alpha]_{\text{D}}^{25} +119.6^\circ$  (c = 0.87,  $\text{CH}_2\text{Cl}_2$ ); HRMS (ESI) calc'd for  $[\text{M}+\text{H}]^+$  509.2047, found 509.2048.



## Pyrroloindoline 13i.

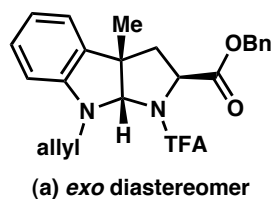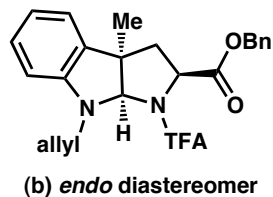

Prepared from 1-allyl-3-methyl-1*H*-indole<sup>14</sup> and benzyl 2-trifluoroacetamidoacrylate using general procedure C, with 1.6 equivalents SnCl<sub>4</sub>. The reaction was allowed to run for 15 h. The crude residue was purified by flash chromatography (0→10% ethyl acetate/hexanes) to yield 79.7 mg (90% yield) of **13i** in a 3:1 ratio of diastereomers (determined by SFC analysis of the purified products, before the diastereomers were separated). The diastereomers were separated by flash chromatography (0→10% ethyl acetate/hexanes).

*Exo* diastereomer: pale yellow oil. The enantiomeric excess was determined to be 93% by chiral SFC analysis (OJ-H, 2.5 mL/min, 6% IPA in CO<sub>2</sub>, λ = 254 nm): *t*<sub>R</sub>(major) = 5.7 min *t*<sub>R</sub>(minor) = 4.3 min. <sup>1</sup>H NMR (400 MHz, CDCl<sub>3</sub>; compound exists as a 5.7:1 mixture of rotamers, the major rotamer is denoted by \*, minor rotamer denoted by §) δ 7.40 (br s, 5H\*, 5H<sup>§</sup>), 7.14 (t, *J* = 7.7 Hz, 1H\*, 1H<sup>§</sup>), 7.09 – 6.95 (br m, 1H<sup>§</sup>), 7.00 (br d, *J* = 7.2 Hz, 1H\*), 6.90 – 6.71 (br m, 1H<sup>§</sup>), 6.76 (br t, *J* = 7.3 Hz, 1H\*), 6.68 – 6.44 (br m, 1H<sup>§</sup>), 6.54 (br d, *J* = 7.9 Hz, 1H\*), 5.82 (br ddd, *J* = 21.5, 10.5, 5.7 Hz, 1H\*, 1H<sup>§</sup>), 5.73 (br s, 1H\*), 5.52 (br s, 1H<sup>§</sup>), 5.34 – 5.09 (m, 4H\*, 4H<sup>§</sup>), 4.75 (br d, *J* = 9.2 Hz, 1H\*), 4.40 (br s, 1H<sup>§</sup>), 4.26 (br d, *J* = 13.1 Hz, 1H\*), 4.04 (br dd, *J* = 16.3, 5.9 Hz, 1H\*, 1H<sup>§</sup>), 3.83 (br s, 1H<sup>§</sup>), 2.60 (br dd, *J* = 13.3, 9.8 Hz, 1H\*, 1H<sup>§</sup>), 2.36 (br d, *J* = 13.4 Hz, 1H\*), 2.20 – 2.03 (m, 1H<sup>§</sup>), 1.46 (s, *J* = 10.6 Hz, 3H<sup>§</sup>), 1.27 (s, *J* = 8.7 Hz, 3H\*); <sup>13</sup>C NMR (100 MHz, CDCl<sub>3</sub>; compound exists as a 5.7:1 mixture of rotamers, the major rotamer is denoted by \*, minor rotamer denoted by §) δ 172.0\*, 169.8<sup>§</sup>, 158.9\* (q, *J*<sub>C-F</sub> = 37.0 Hz), 148.4\*<sup>§</sup>, 134.8\*, 134.6\*, 133.8\*, 133.4<sup>§</sup>, 128.8\*, 128.7\*, 128.7\*, 121.5\*, 120.3<sup>§</sup>, 118.7\*, 117.7<sup>§</sup>, 116.7\*, 116.0\* (q, *J*<sub>C-F</sub> = 288.5 Hz), 110.8<sup>§</sup>, 108.4\*, 91.3\*, 89.7<sup>§</sup>, 68.0\*, 67.4<sup>§</sup>, 61.1<sup>§</sup>, 60.0\*, 53.6<sup>§</sup>, 51.8\*, 50.5<sup>§</sup>, 49.4\*, 44.1\*, 40.7<sup>§</sup>, 23.5\*<sup>§</sup>; IR (NaCl/thin film): 3035, 2968, 1748, 1694, 1609, 1488, 1424, 1339, 1257, 1148, 1026, 921, 744 cm<sup>-1</sup>; [α]<sub>D</sub><sup>25</sup> = -94.3 (*c* 1.14, CH<sub>2</sub>Cl<sub>2</sub>); HRMS (ESI) calc'd for [M+H]<sup>+</sup> 445.1734, found 445.1750.

*Endo* diastereomer: pale yellow oil. The enantiomeric excess was determined to be 89% by chiral SFC analysis (OJ-H, 2.5 mL/min, 2% IPA in CO<sub>2</sub>, λ = 254 nm): *t*<sub>R</sub>(major) = 5.9 min *t*<sub>R</sub>(minor) = 5.1 min. <sup>1</sup>H NMR (500 MHz, CDCl<sub>3</sub>; compound exists as a 15.7:1 mixture of rotamers, the major rotamer is denoted by \*, minor rotamer denoted by §) δ 7.36 – 7.30 (m, 3H\*, 3H<sup>§</sup>), 7.19 (dd, *J* = 6.5, 3.0 Hz, 2H<sup>§</sup>), 7.16 – 7.11 (m, 2H\*), 7.08 (td, *J* = 7.7, 1.3 Hz, 1H\*, 1H<sup>§</sup>), 7.04 (d, *J* = 7.4 Hz, 1H<sup>§</sup>), 6.99 (dd, *J* = 7.4, 0.9 Hz, 1H\*), 6.73 (t, *J* = 7.0 Hz, 1H<sup>§</sup>), 6.68 (td, *J* = 7.4, 0.9 Hz, 1H\*), 6.35 (d, *J* = 7.4 Hz,

<sup>14</sup> Odle, R.; Blevins, B.; Ratcliff, M.; Hegedus, L.S. *J. Org. Chem.* **1980**, *45*, 2709.

1H $\delta$ ), 6.34 (d,  $J = 7.8$  Hz, 1H\*), 5.77 (dddd,  $J = 17.1, 10.4, 5.5, 5.1$  Hz, 1H\*), 5.73 – 5.67 (m, 1H $\delta$ ), 5.58 (s, 1H\*), 5.55 – 5.53 (m, 1H $\delta$ ), 5.22 (dq,  $J = 17.1, 1.6$  Hz, 1H\*), 5.16 (dd,  $J = 9.6, 4.3$  Hz, 1H $\delta$ ), 5.14 – 5.10 (m, 2H $\delta$ ), 5.05 (dq,  $J = 10.2, 1.5$  Hz, 1H\*), 4.97 (d,  $J = 12.3$  Hz, 1H $\delta$ ), 4.91 (d,  $J = 12.3$  Hz, 1H $\delta$ ), 4.80 (d,  $J = 8.5$  Hz, 1H\*), 4.68 (d,  $J = 12.1$  Hz, 1H\*), 4.36 (d,  $J = 12.1$  Hz, 1H\*), 4.15 (ddt,  $J = 16.7, 5.9, 1.5$  Hz, 1H\*), 4.01 (ddt,  $J = 16.7, 5.0, 1.6$  Hz, 1H\*), 3.68 – 3.64 (m, 1H $\delta$ ), 2.88 (d,  $J = 13.0$  Hz, 1H\*), 2.53 (dd,  $J = 13.3, 4.3$  Hz, 1H $\delta$ ), 2.40 (dd,  $J = 13.0, 8.5$  Hz, 1H\*), 2.26 (dd,  $J = 13.3, 9.6$  Hz, 1H $\delta$ ), 1.44 (s, 1H $\delta$ ), 1.43 (s, 1H\*);  $^{13}\text{C}$  NMR (125 MHz,  $\text{CDCl}_3$ ; compound exists as a 15.7:1 mixture of rotamers, the major rotamer is denoted by \*, minor rotamer denoted by  $\delta$ )  $\delta$  169.3\*, 156.9\* (q,  $J_{\text{C-F}} = 36.9$  Hz), 149.3\*, 147.7 $\delta$ , 134.7\*, 134.1\*, 133.2 $\delta$ , 132.4 $\delta$ , 132.0\*, 128.9\*, 128.6 $\delta$ , 128.5 $\delta$ , 128.5\*, 128.4\*, 128.3\*, 128.2 $\delta$ , 122.6\*, 121.7 $\delta$ , 118.7 $\delta$ , 118.0\*, 117.1 $\delta$ , 116.3\*, 116.2\* (q,  $J_{\text{C-F}} = 288.7$  Hz), 108.0 $\delta$ , 106.9\*, 88.1\*, 67.6\*, 67.3 $\delta$ , 60.4 $\delta$ , 60.2\*, 52.7 $\delta$ , 50.6\*, 48.8\*, 42.5\*, 41.5 $\delta$ , 25.8\*, 23.1 $\delta$ ; IR (NaCl/thin film): 2962, 1739, 1697, 1608, 1491, 1447, 1269, 1211, 1145, 851, 742  $\text{cm}^{-1}$ ;  $[\alpha]_{\text{D}}^{25} = +166.6$  ( $c$  1.52,  $\text{CH}_2\text{Cl}_2$ ); HRMS (ESI) calc'd for  $[\text{M}+\text{H}]^+$  445.1734, found 445.1740.

## Chromatograms of racemic and enantiomerically enriched pyrroloindolines.

### 7a (Table 1, entries 2-6): racemic

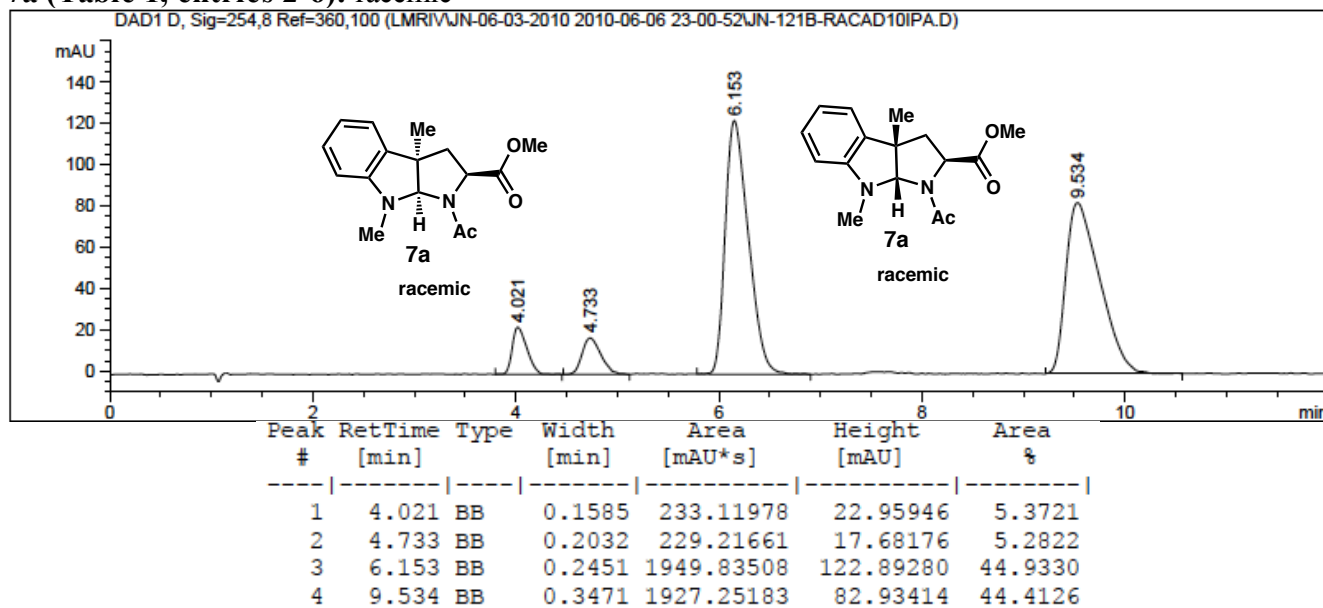

### 7a (Table 1, entry 2): enantioenriched, *exo*: 64% ee, *endo*: 83% ee

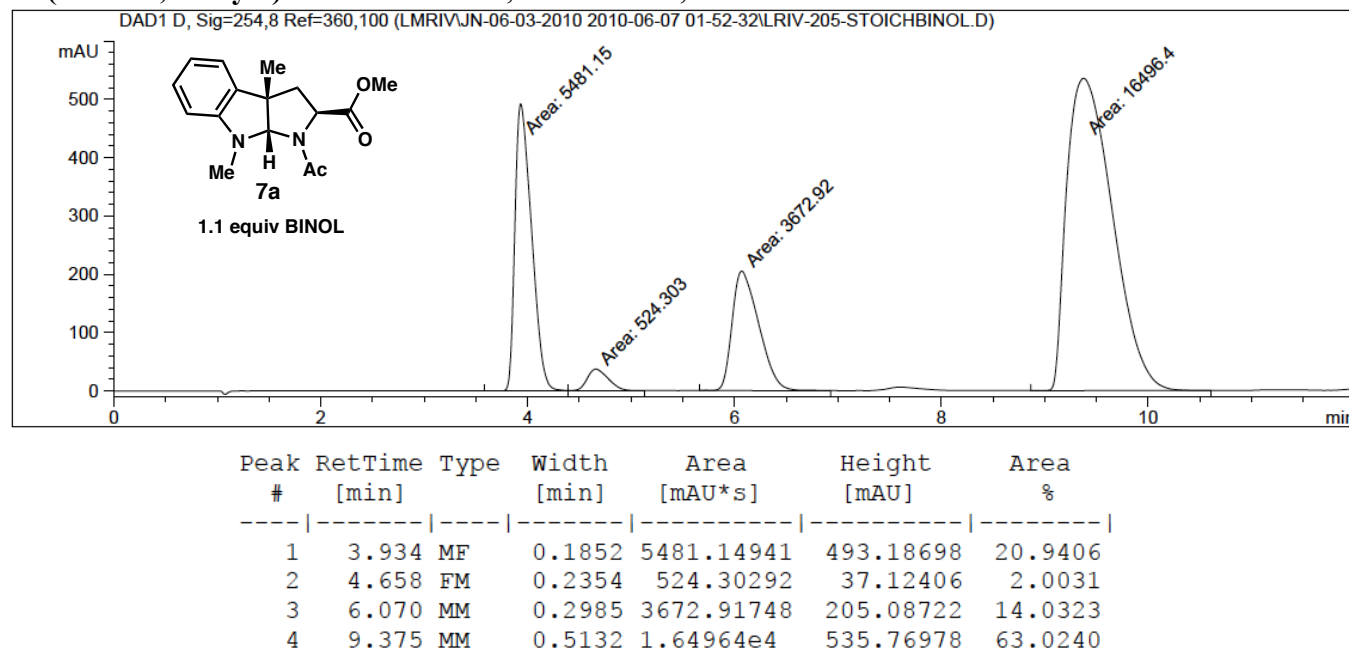

**7a (Table 1, entry 4):** enantioenriched, *exo*: 63% ee, *endo*: 83% ee

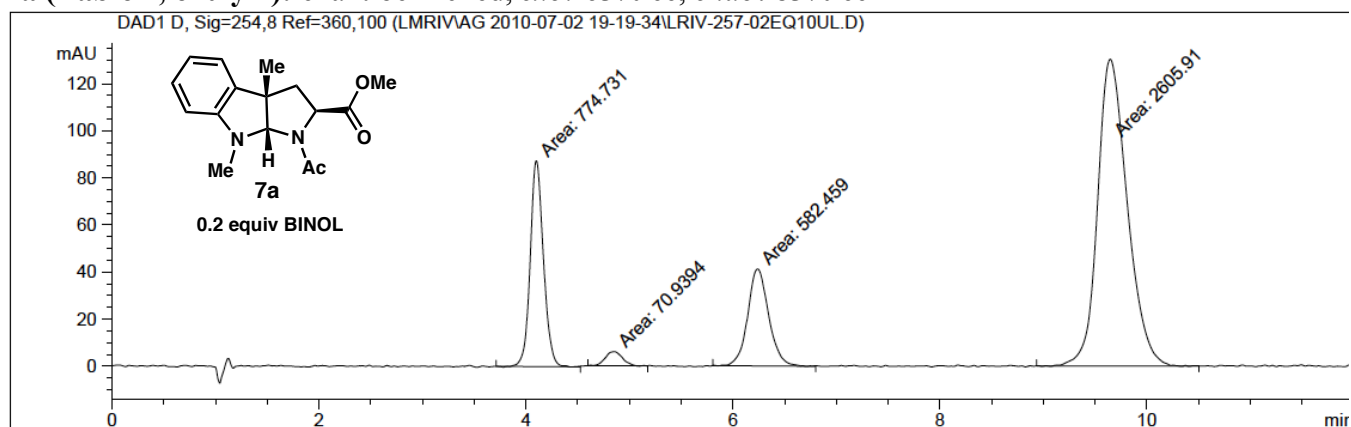

| Peak # | RetTime [min] | Type | Width [min] | Area [mAU*s] | Height [mAU] | Area %  |
|--------|---------------|------|-------------|--------------|--------------|---------|
| 1      | 4.100         | MM   | 0.1473      | 774.73053    | 87.65621     | 19.2048 |
| 2      | 4.852         | MM   | 0.1955      | 70.93945     | 6.04832      | 1.7585  |
| 3      | 6.238         | MM   | 0.2351      | 582.45917    | 41.28461     | 14.4386 |
| 4      | 9.647         | MM   | 0.3330      | 2605.91260   | 130.42717    | 64.5981 |

**exo-7b (Table 1, entry 7): racemic**

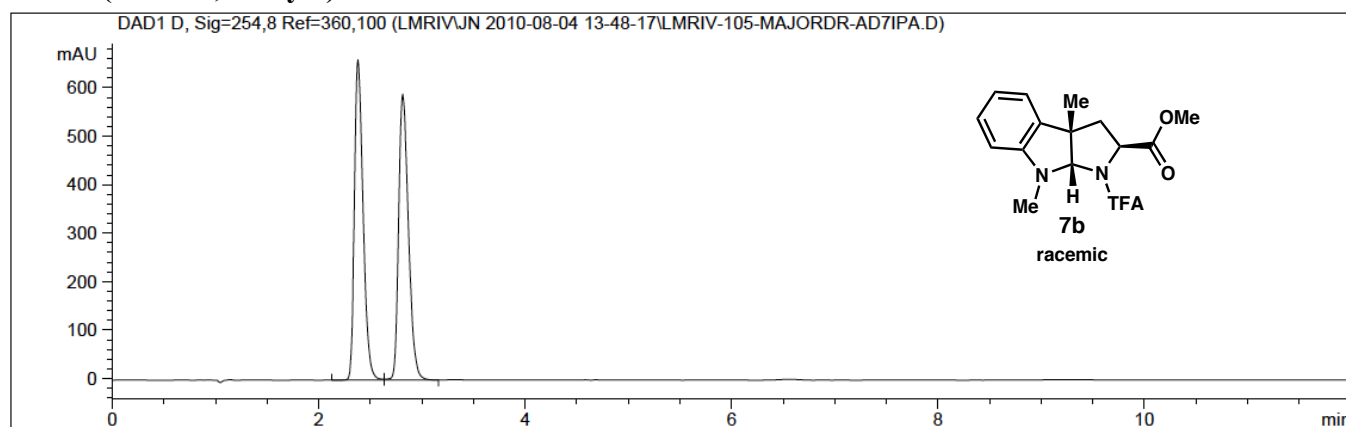

| Peak # | RetTime [min] | Type | Width [min] | Area [mAU*s] | Height [mAU] | Area %  |
|--------|---------------|------|-------------|--------------|--------------|---------|
| 1      | 2.381         | BV   | 0.0886      | 3856.54150   | 655.60498    | 49.8096 |
| 2      | 2.815         | VB   | 0.1009      | 3886.01978   | 589.71381    | 50.1904 |

**exo-7b (Table 1, entry 7): enantioenriched, 86% ee**

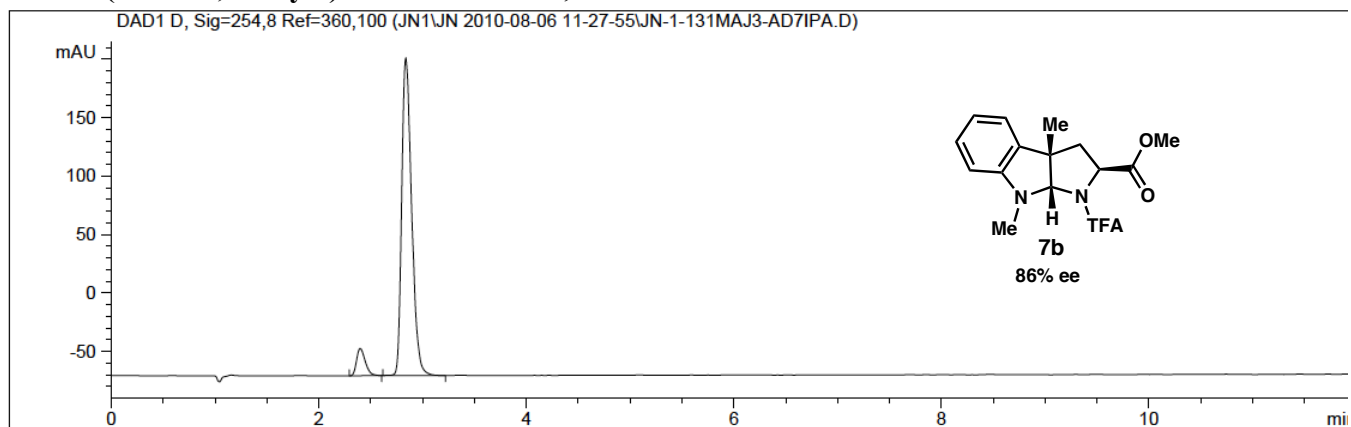

| Peak # | RetTime [min] | Type | Width [min] | Area [mAU*s] | Height [mAU] | Area %  |
|--------|---------------|------|-------------|--------------|--------------|---------|
| 1      | 2.399         | BB   | 0.0925      | 136.26041    | 23.19655     | 6.9999  |
| 2      | 2.839         | BB   | 0.1061      | 1810.34204   | 270.34299    | 93.0001 |

**exo-7c (Table 1, entry 8): racemic**

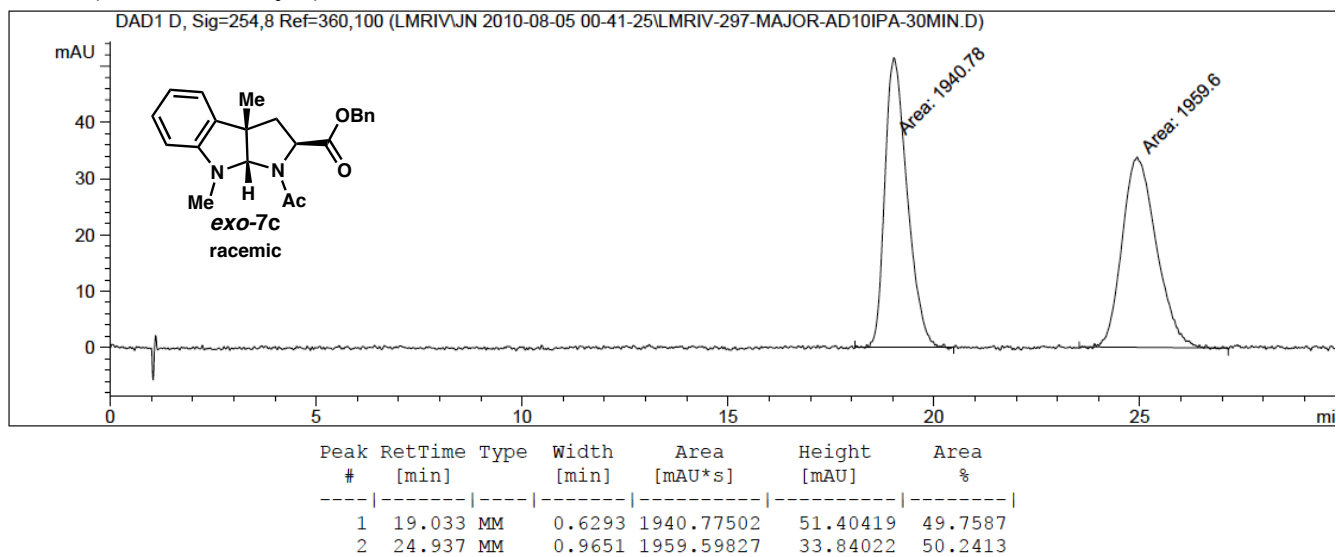

**exo-7c (Table 1, entry 8): enantioenriched, 74% ee**

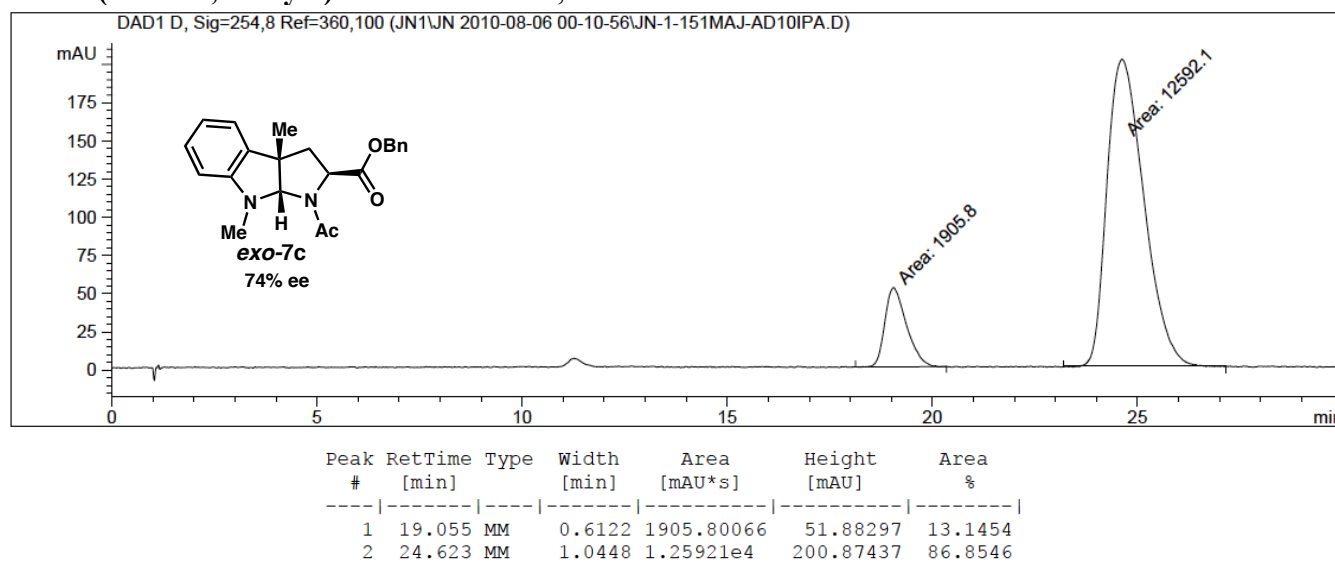

**endo-7c (Table 1, entry 8): racemic**

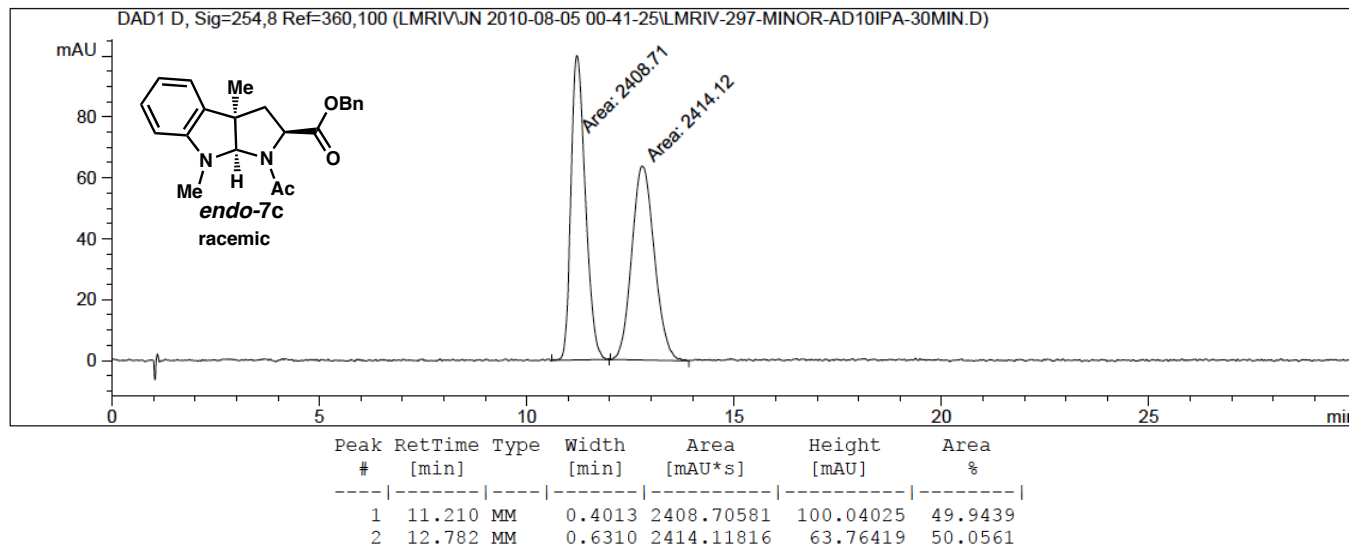

**endo-7c (Table 1, entry 8): enantioenriched, 82% ee**

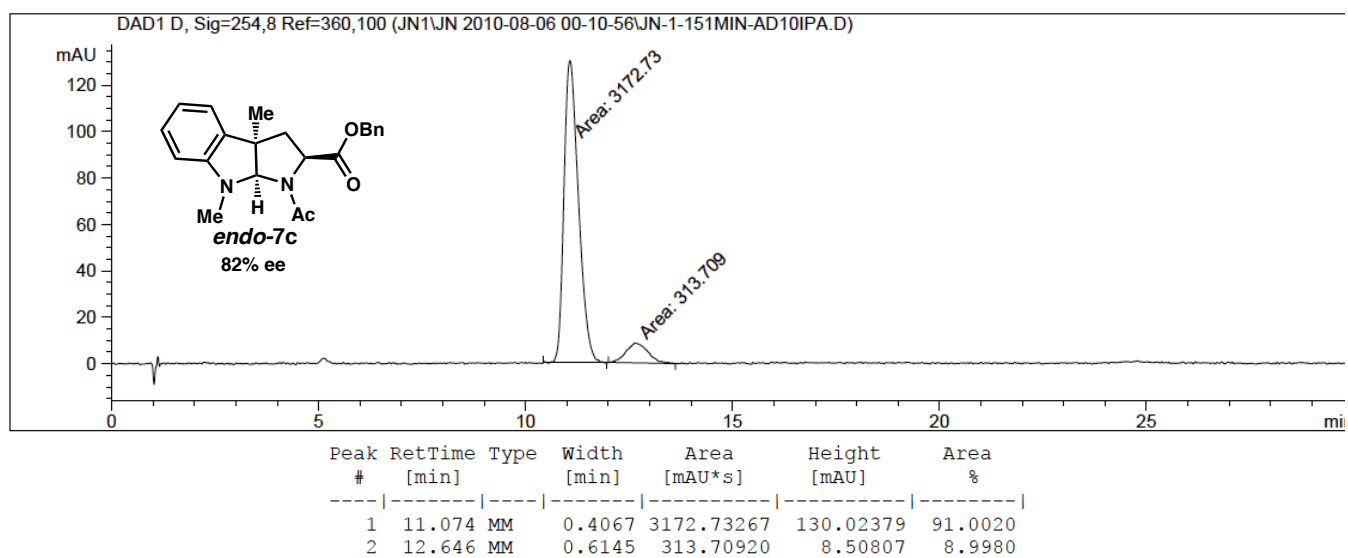

**7d (Table 1, entry 10): racemic**

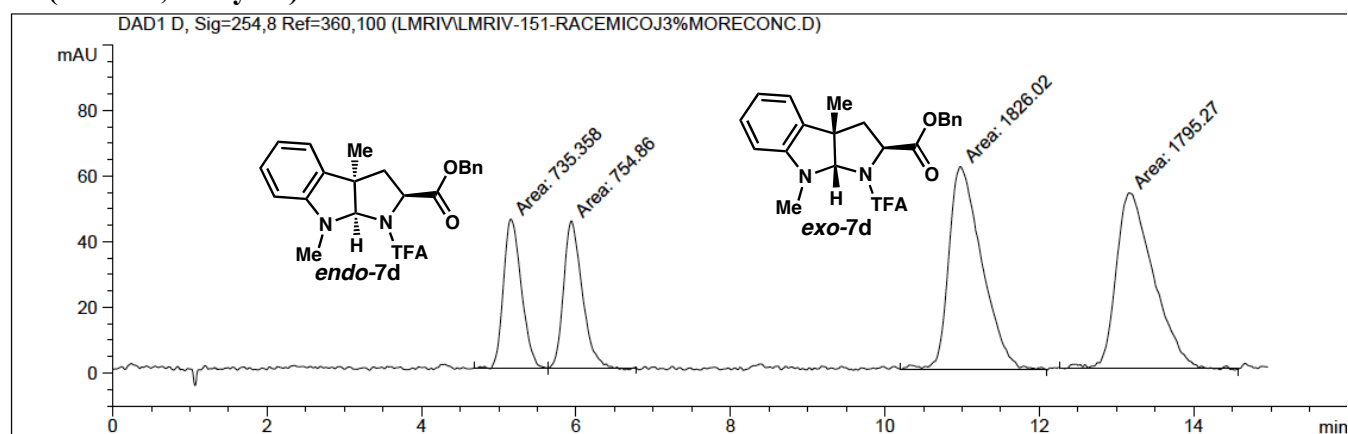

| Peak # | RetTime [min] | Type | Width [min] | Area [mAU*s] | Height [mAU] | Area %  |
|--------|---------------|------|-------------|--------------|--------------|---------|
| 1      | 5.156         | MF   | 0.2696      | 735.35803    | 45.45393     | 14.3863 |
| 2      | 5.940         | FM   | 0.2802      | 754.85999    | 44.89612     | 14.7679 |
| 3      | 10.979        | MM   | 0.4932      | 1826.01990   | 61.70875     | 35.7237 |
| 4      | 13.166        | MM   | 0.5603      | 1795.26794   | 53.40647     | 35.1221 |

**7d (Table 1, entry 10): enantioenriched, *exo*: 94% ee, *endo*: 91% ee**

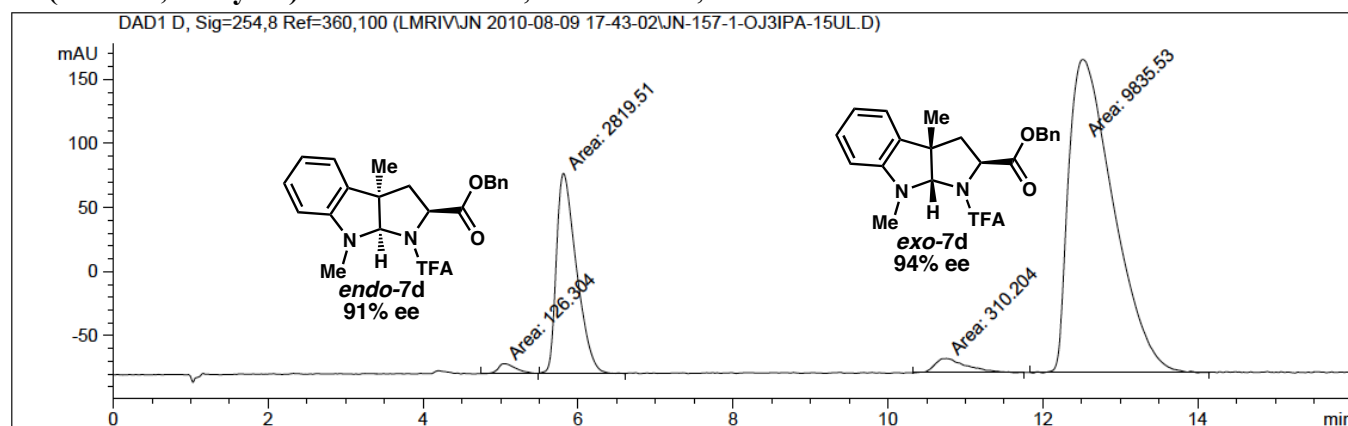

| Peak # | RetTime [min] | Type | Width [min] | Area [mAU*s] | Height [mAU] | Area %  |
|--------|---------------|------|-------------|--------------|--------------|---------|
| 1      | 5.044         | MM   | 0.2729      | 126.30366    | 7.71386      | 0.9648  |
| 2      | 5.812         | MM   | 0.3004      | 2819.51172   | 156.42670    | 21.5369 |
| 3      | 10.749        | MM   | 0.4705      | 310.20364    | 10.98786     | 2.3695  |
| 4      | 12.515        | MM   | 0.6705      | 9835.53320   | 244.48642    | 75.1289 |



### Pyrroloindoline product from reaction with 3-methyl-1H-indole: racemic

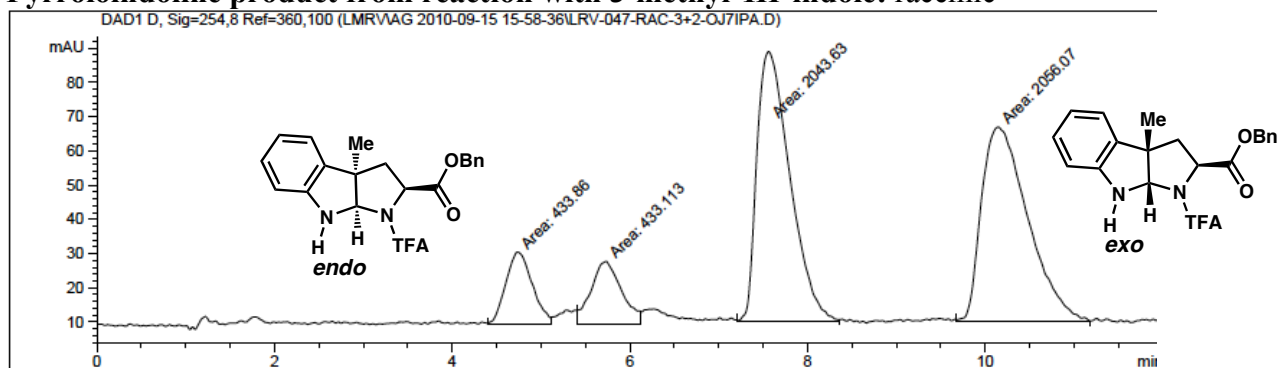

| Peak # | RetTime [min] | Type | Width [min] | Area [mAU*s] | Height [mAU] | Area %  |
|--------|---------------|------|-------------|--------------|--------------|---------|
| 1      | 4.737         | MM   | 0.3442      | 433.85974    | 21.00586     | 8.7354  |
| 2      | 5.733         | MM   | 0.3971      | 433.11276    | 18.17621     | 8.7204  |
| 3      | 7.564         | MM   | 0.4321      | 2043.62988   | 78.82232     | 41.1469 |
| 4      | 10.149        | MM   | 0.6038      | 2056.07129   | 56.75510     | 41.3974 |

### Pyrroloindoline product from reaction with 3-methyl-1H-indole: enantioenriched, exo: 95% ee

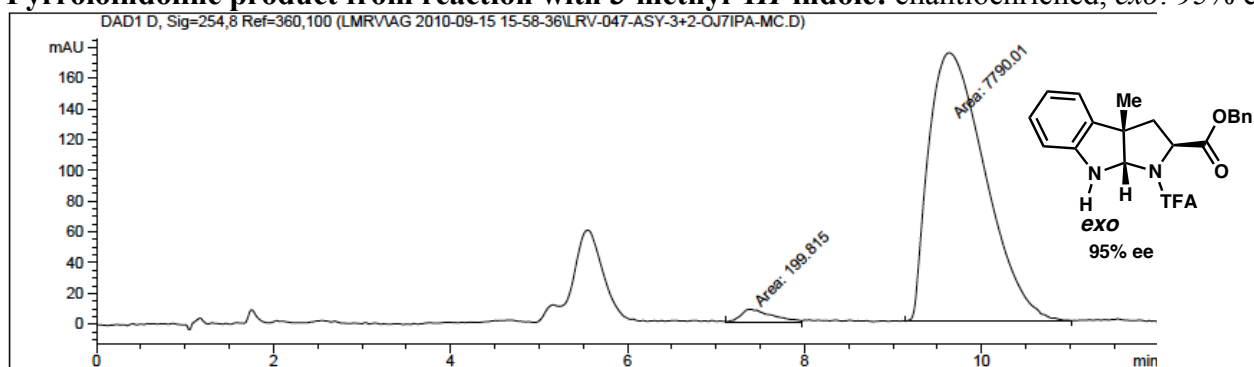

| Peak # | RetTime [min] | Type | Width [min] | Area [mAU*s] | Height [mAU] | Area %  |
|--------|---------------|------|-------------|--------------|--------------|---------|
| 1      | 7.393         | MM   | 0.4059      | 199.81528    | 8.20531      | 2.5009  |
| 2      | 9.640         | MM   | 0.7421      | 7790.00586   | 174.96088    | 97.4991 |

### 13a (Scheme 2): racemic

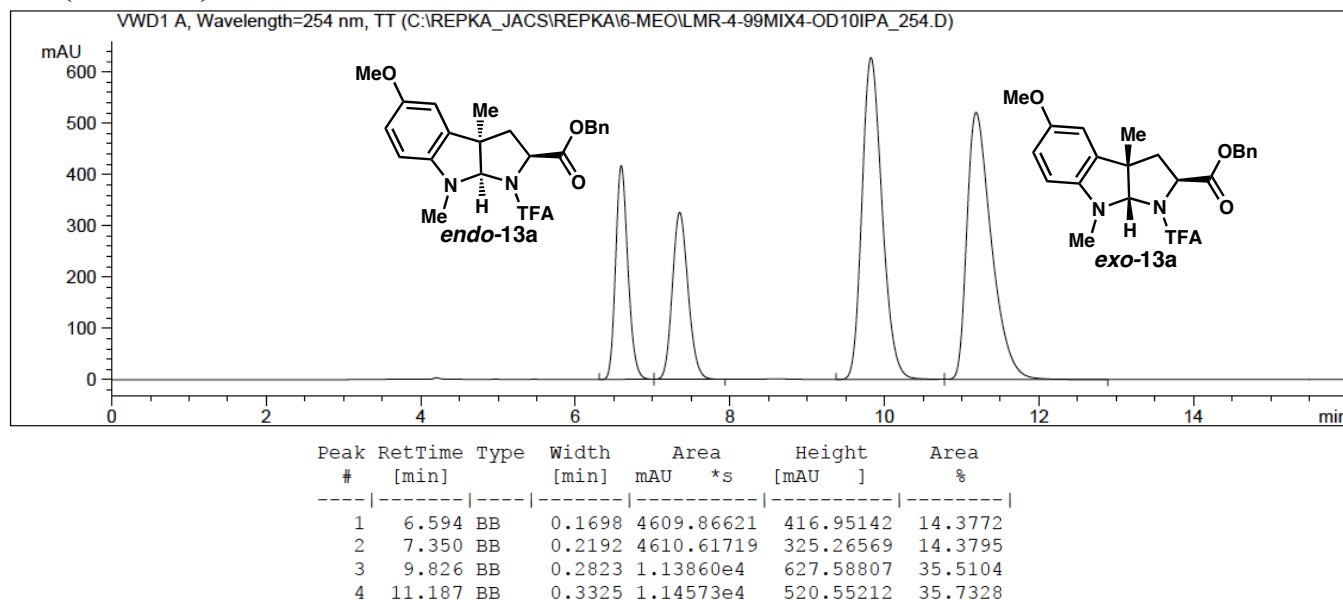

### 13a (Scheme 2): *exo*: 93% ee, *endo*: 92% ee

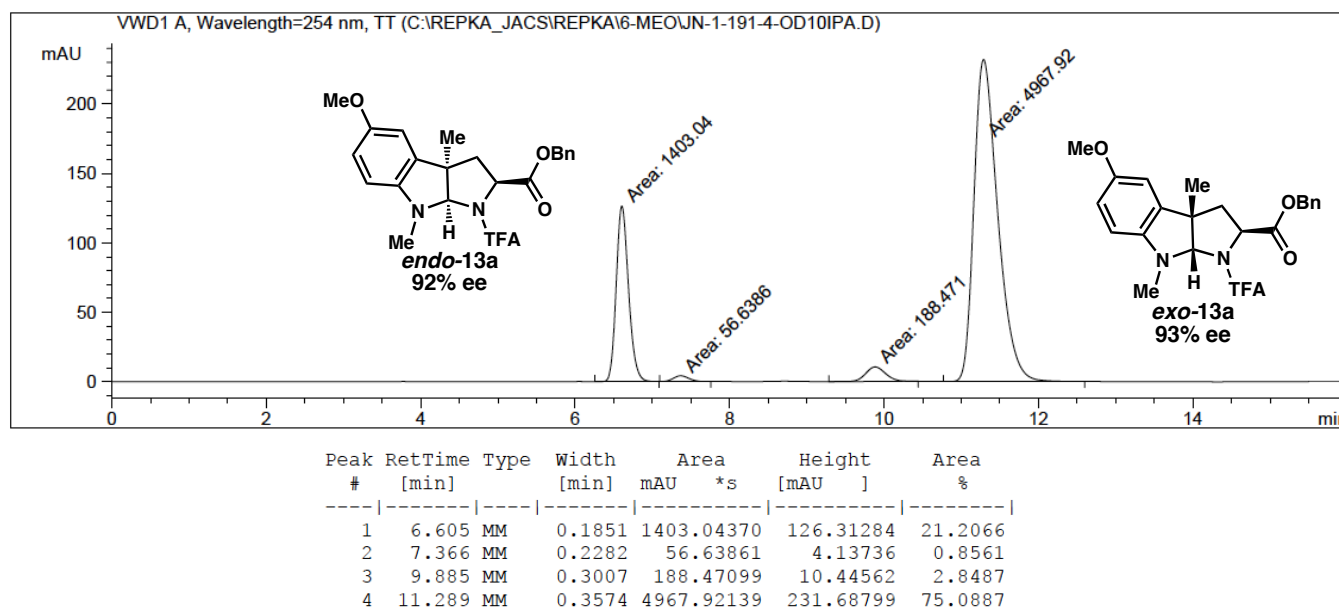

**13b (Scheme 2): racemic**

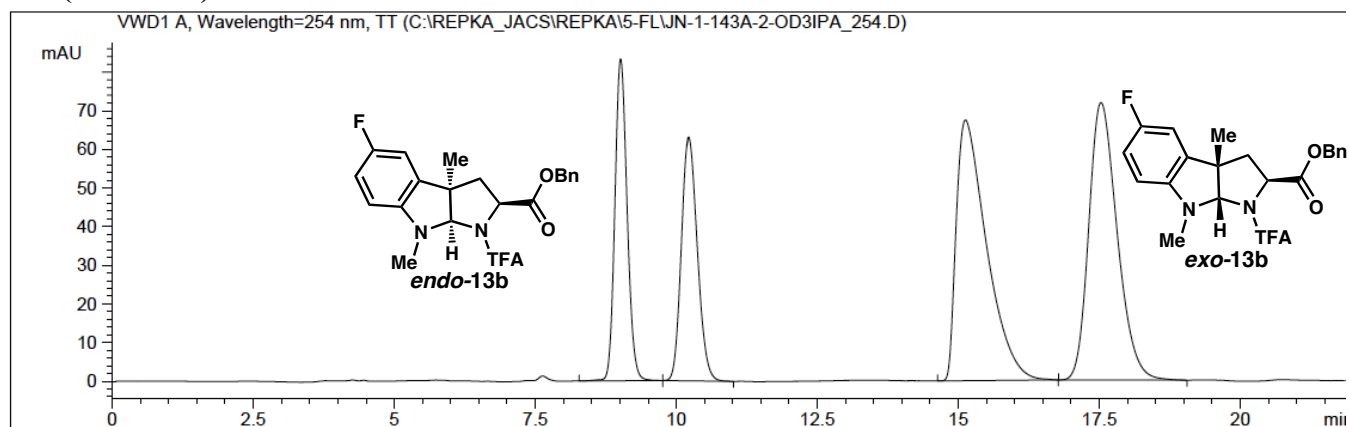

| Peak # | RetTime [min] | Type | Width [min] | Area mAU   | Area *s | Height [mAU] | Area %  |
|--------|---------------|------|-------------|------------|---------|--------------|---------|
| 1      | 9.013         | BB   | 0.2330      | 1253.27209 |         | 83.29908     | 16.6472 |
| 2      | 10.220        | BB   | 0.3072      | 1244.32800 |         | 63.10659     | 16.5284 |
| 3      | 15.127        | BB   | 0.5588      | 2519.96948 |         | 67.46533     | 33.4727 |
| 4      | 17.529        | BB   | 0.5354      | 2510.85742 |         | 71.80063     | 33.3517 |

**13b (Scheme 2): exo: 93% ee endo: 90% ee**

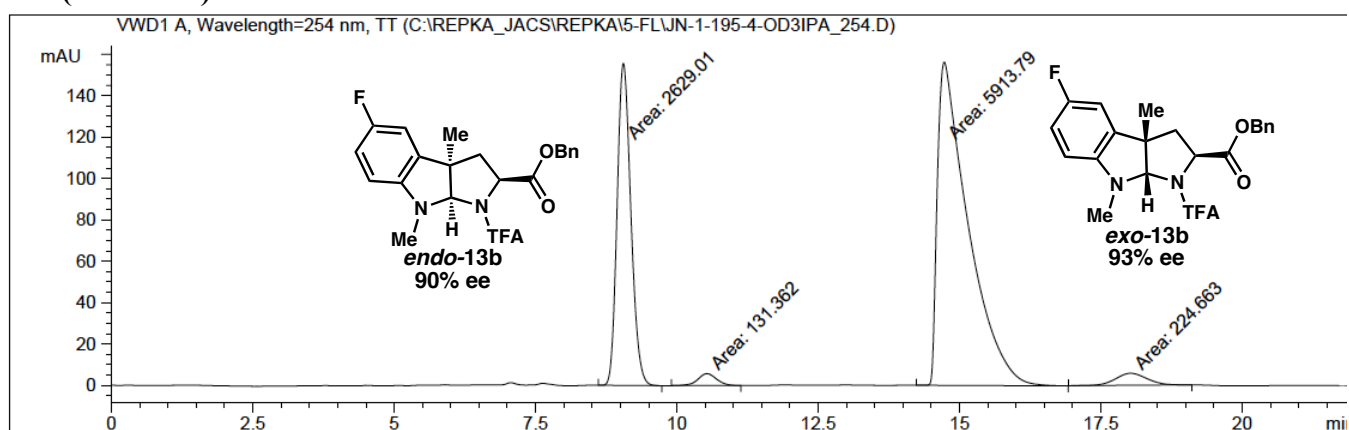

| Peak # | RetTime [min] | Type | Width [min] | Area mAU   | Area *s | Height [mAU] | Area %  |
|--------|---------------|------|-------------|------------|---------|--------------|---------|
| 1      | 9.053         | MM   | 0.2815      | 2629.00732 |         | 155.65556    | 29.5433 |
| 2      | 10.530        | MM   | 0.3806      | 131.36226  |         | 5.75281      | 1.4762  |
| 3      | 14.729        | MM   | 0.6305      | 5913.78809 |         | 156.33769    | 66.4559 |
| 4      | 18.025        | MM   | 0.6446      | 224.66296  |         | 5.80853      | 2.5246  |

**13c (Scheme 2): racemic**

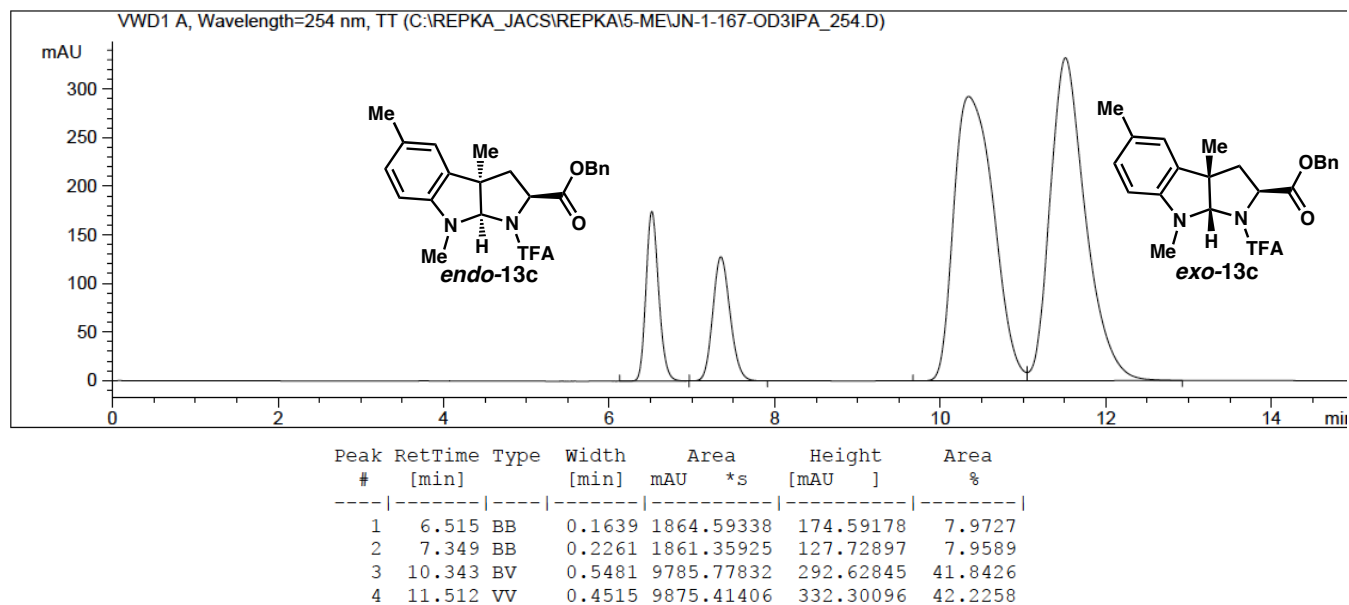

**13c (Scheme 2): enantioenriched, *exo*: 94% ee, *endo*: 91% ee**

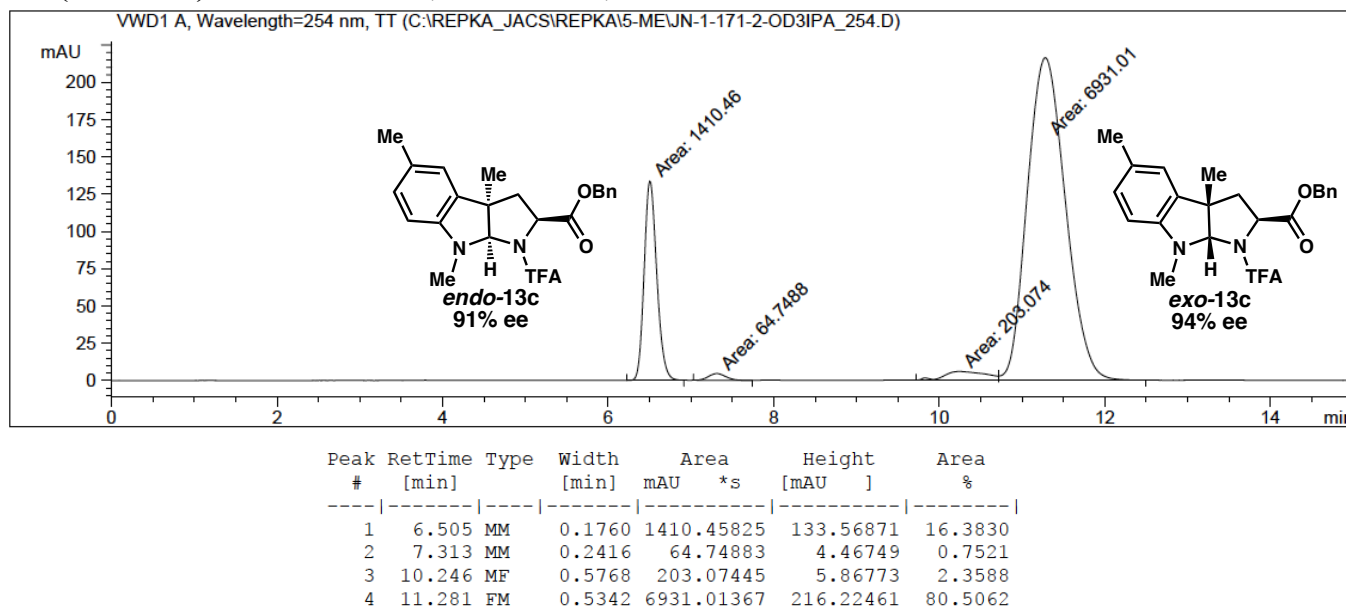

**endo-13d (Scheme 2): racemic**

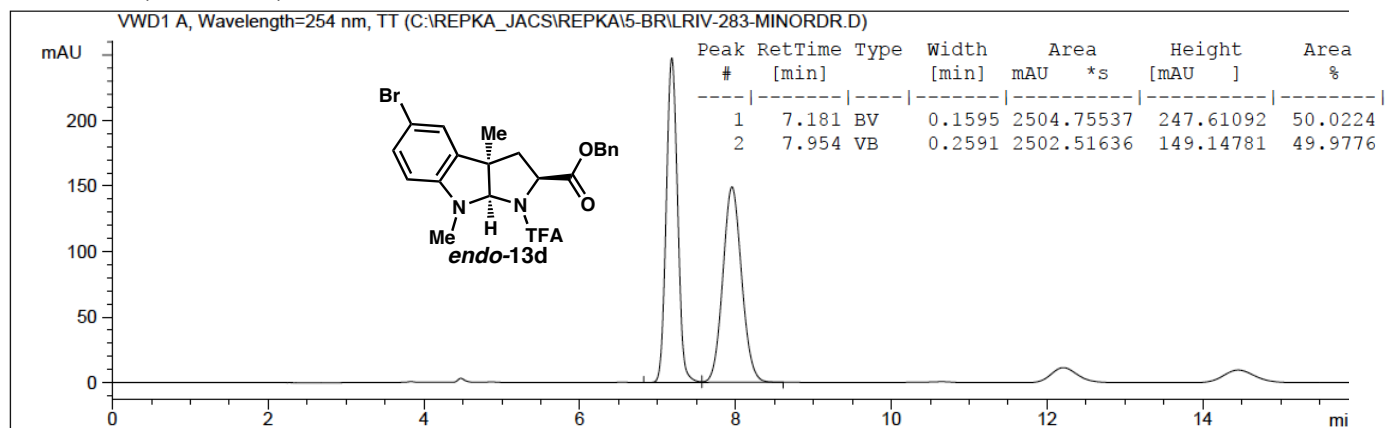

**exo-13d (Scheme 2): racemic**

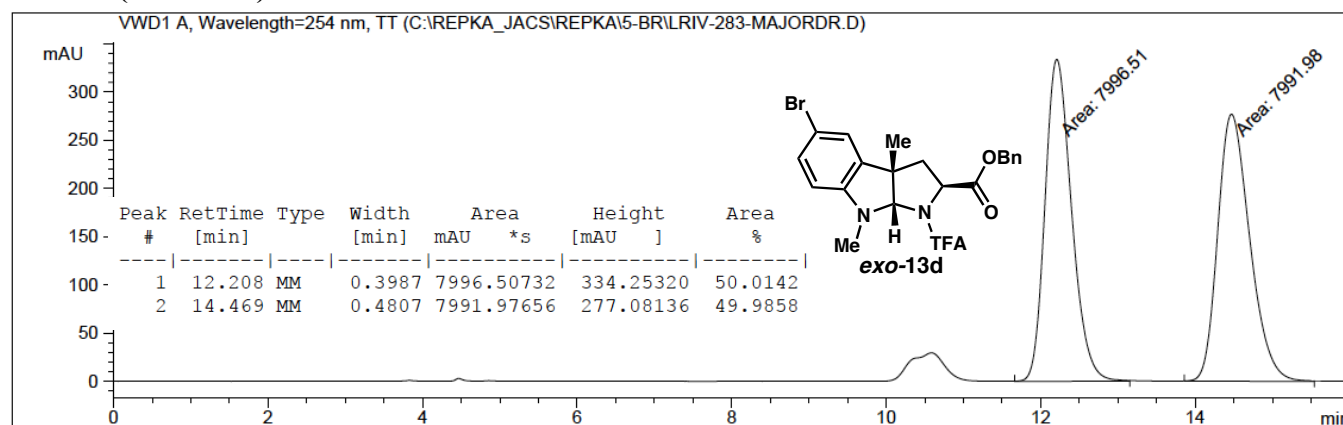

**13d (Scheme 2): exo: 87% ee, endo: 85% ee**

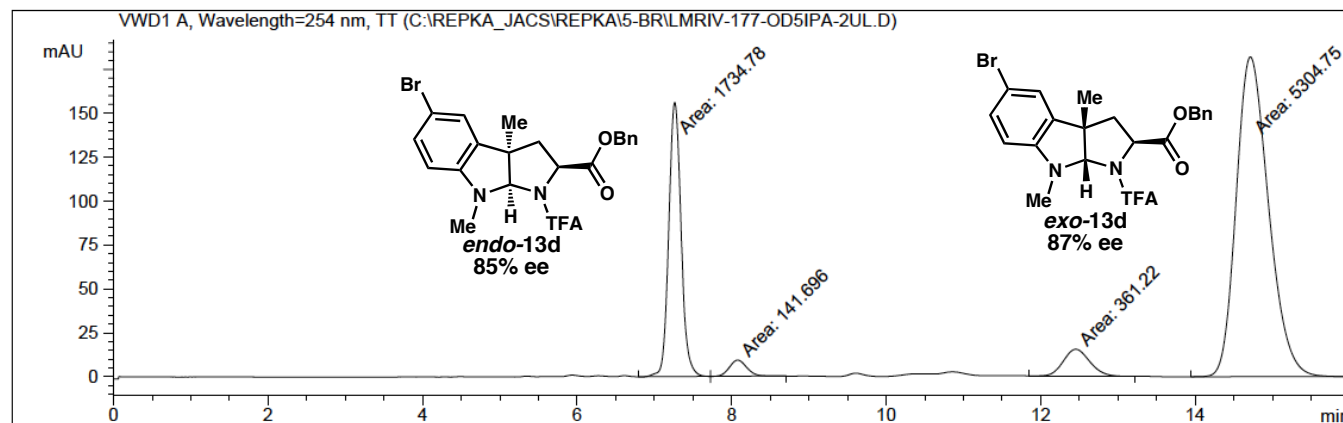

| Peak # | RetTime [min] | Type | Width [min] | Area mAU*s | Height [mAU] | Area %  |
|--------|---------------|------|-------------|------------|--------------|---------|
| 1      | 7.263         | MF   | 0.1852      | 1734.78003 | 156.08707    | 23.0002 |
| 2      | 8.076         | FM   | 0.2580      | 141.69585  | 9.15505      | 1.8786  |
| 3      | 12.454        | MM   | 0.3947      | 361.21967  | 15.25336     | 4.7892  |
| 4      | 14.714        | MM   | 0.4855      | 5304.75488 | 182.11263    | 70.3320 |

### 13e (Scheme 2): racemic

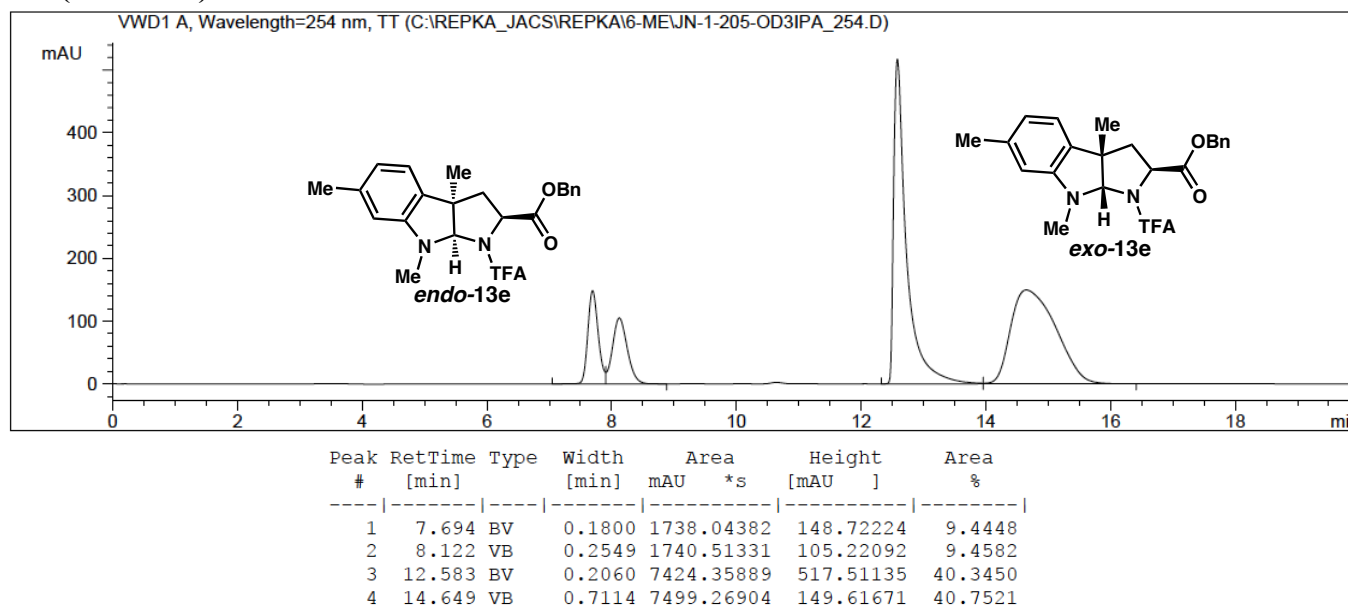

### 13e (Scheme 2): *exo*: 94% ee, *endo*: 90% ee

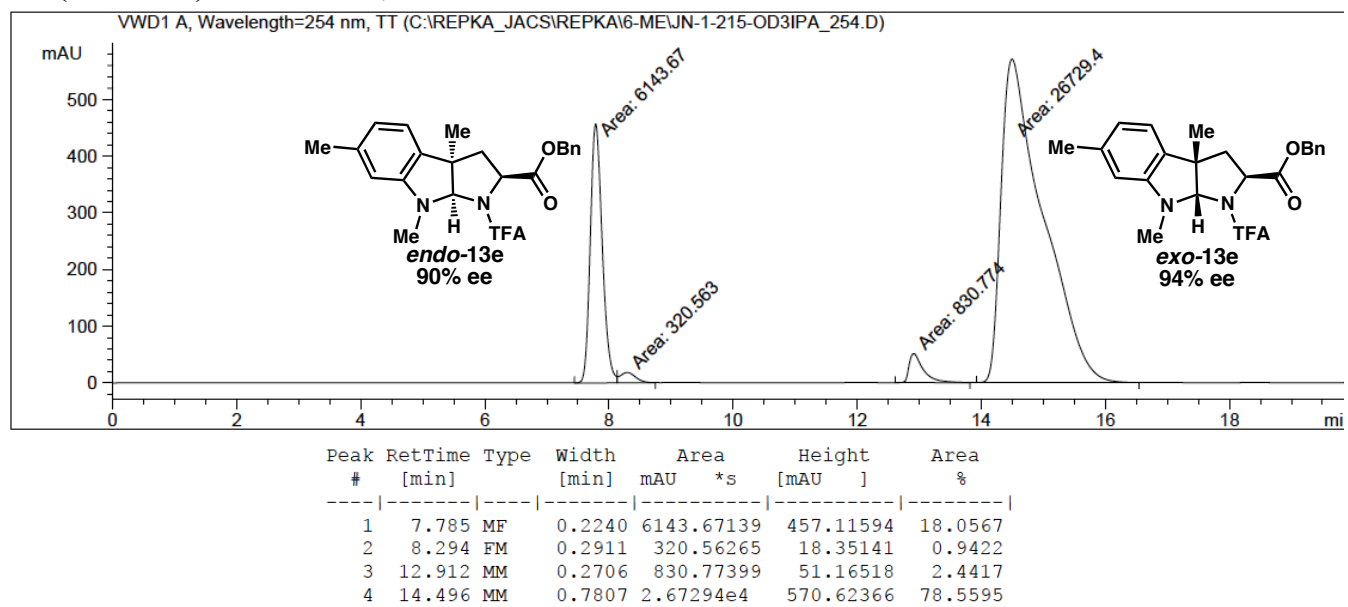

**endo-13f (Scheme 2): racemic**

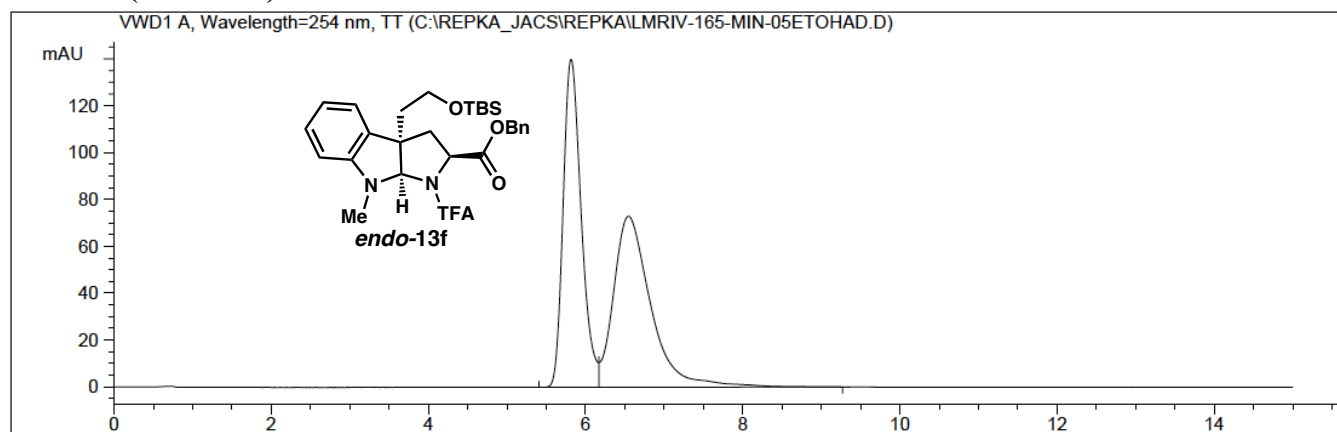

| Peak # | RetTime [min] | Type | Width [min] | Area mAU *s | Height [mAU] | Area %  |
|--------|---------------|------|-------------|-------------|--------------|---------|
| 1      | 5.815         | BV   | 0.2467      | 2234.77563  | 139.96280    | 48.1102 |
| 2      | 6.546         | VB   | 0.4858      | 2410.33862  | 72.97266     | 51.8898 |

**endo-13f (Scheme 2): 90% ee**

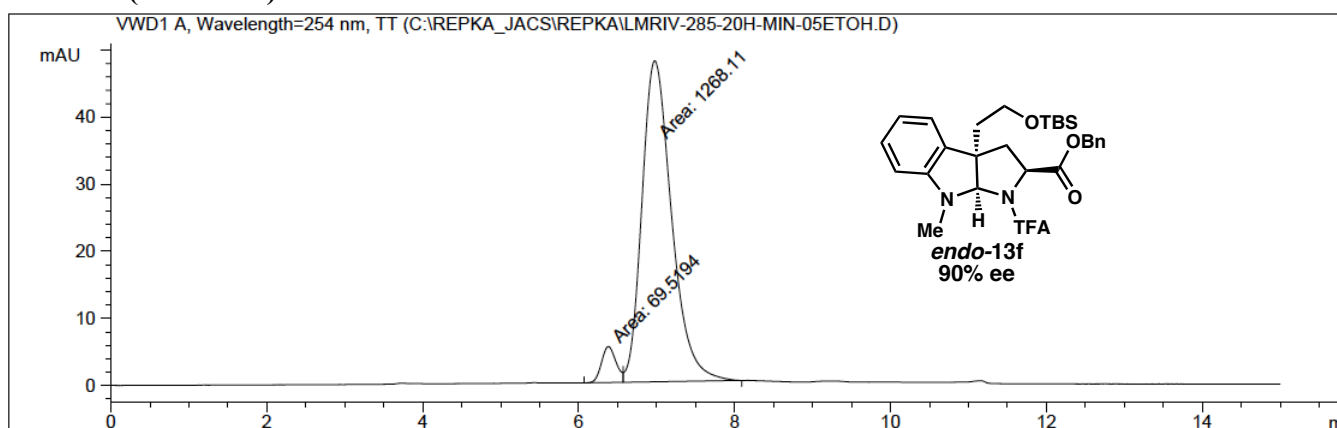

| Peak # | RetTime [min] | Type | Width [min] | Area mAU *s | Height [mAU] | Area %  |
|--------|---------------|------|-------------|-------------|--------------|---------|
| 1      | 6.380         | MF   | 0.2166      | 69.51939    | 5.34894      | 5.1972  |
| 2      | 6.976         | FM   | 0.4419      | 1268.11157  | 47.82830     | 94.8028 |

**exo-13f (Scheme 2): racemic**

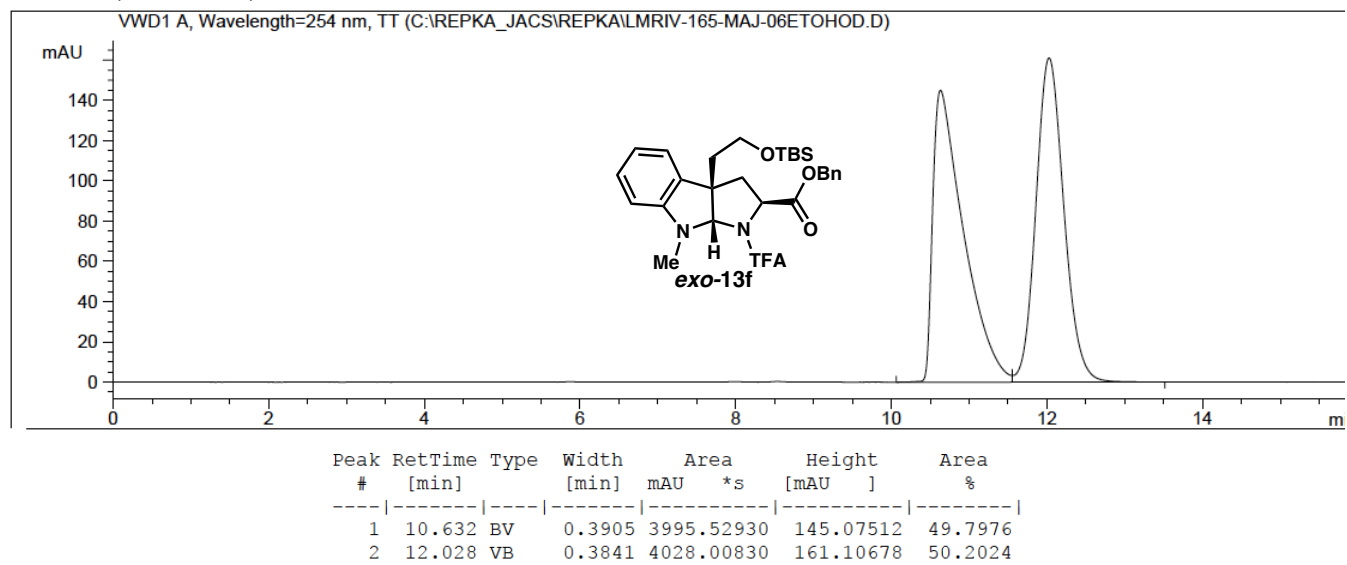

**exo-13f (Scheme 2): 92% ee**

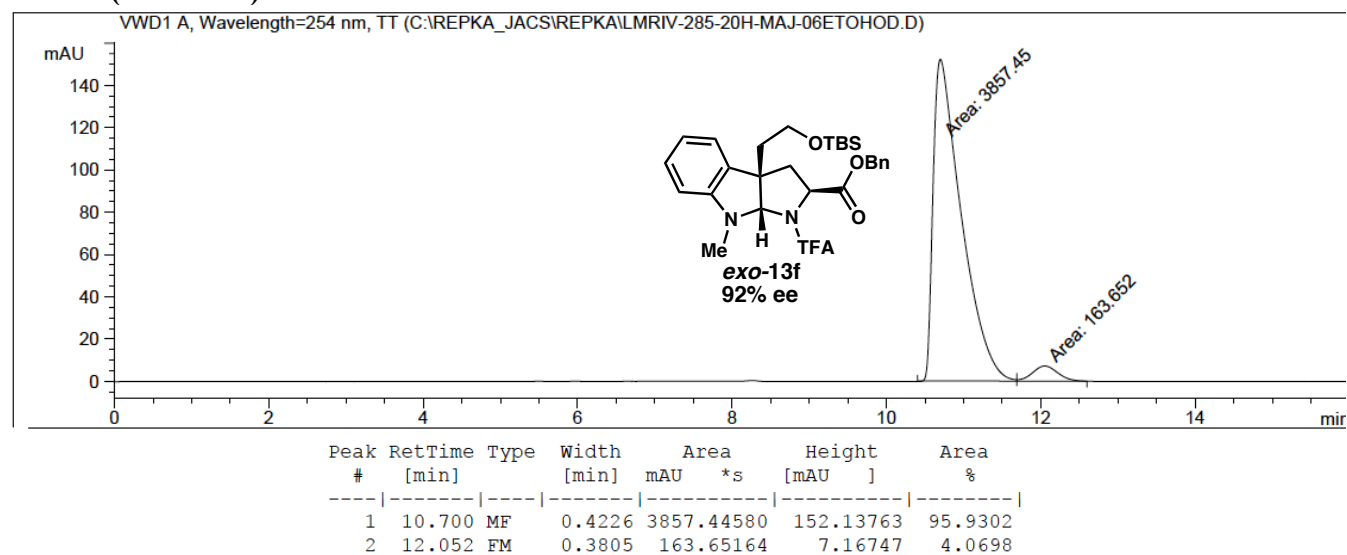



### 13g (Scheme 2): racemic

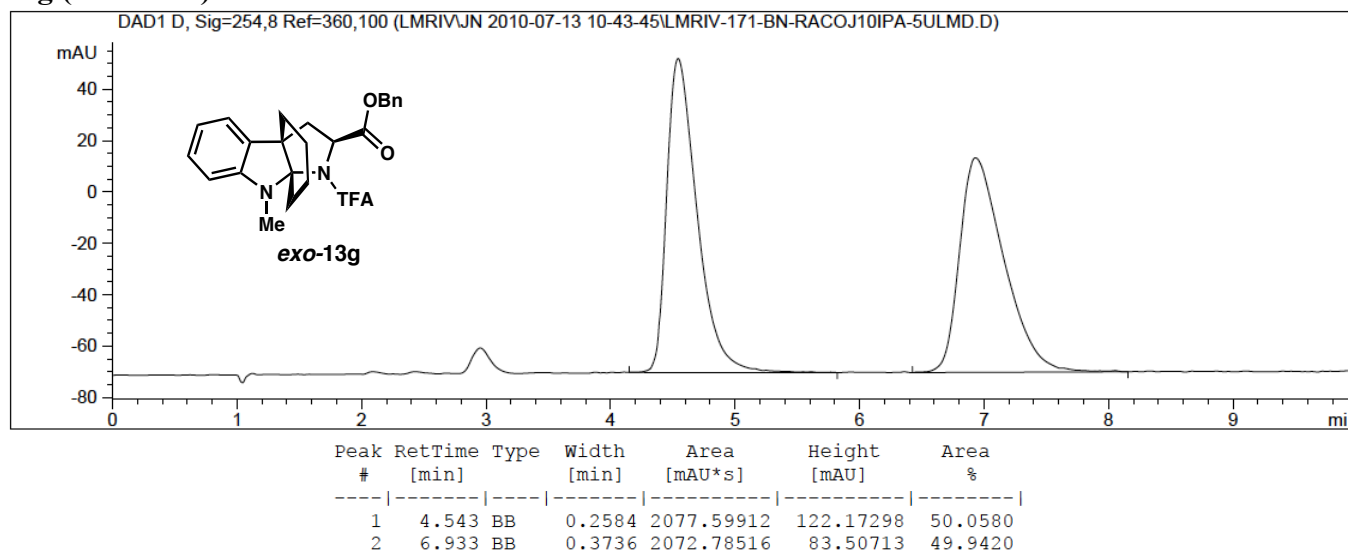

### 13g (Scheme 2): *exo*: 86% ee

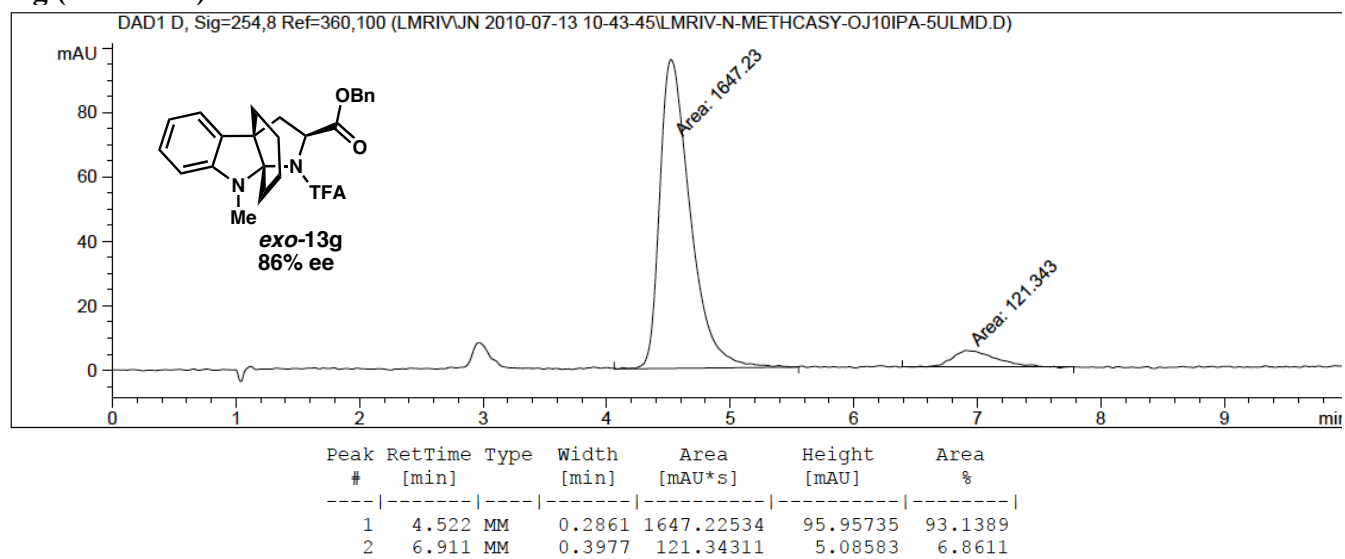

### 13h (Scheme 2): racemic

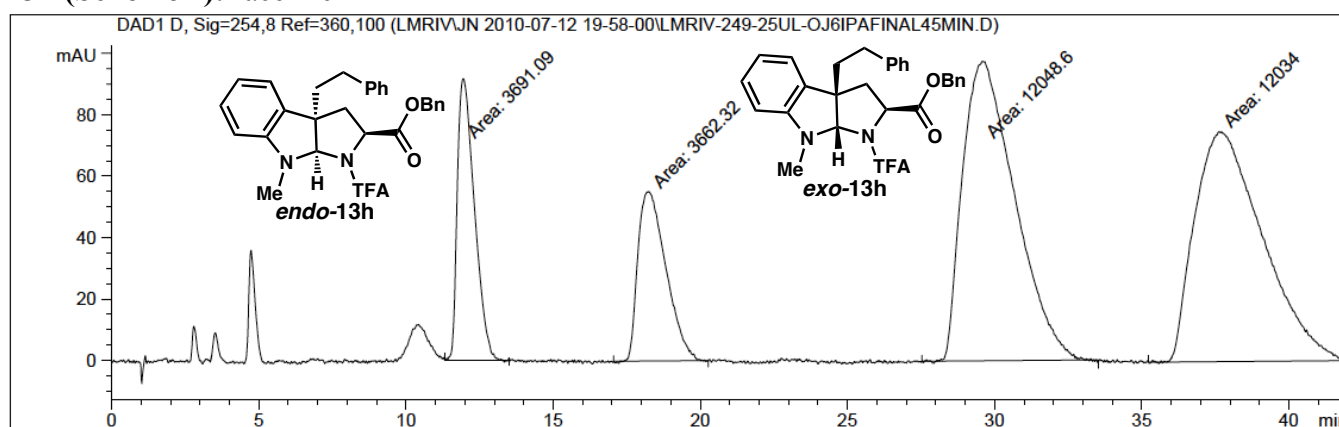

| Peak # | RetTime [min] | Type | Width [min] | Area [mAU*s] | Height [mAU] | Area %  |
|--------|---------------|------|-------------|--------------|--------------|---------|
| 1      | 11.947        | MM   | 0.6720      | 3691.09326   | 91.53949     | 11.7416 |
| 2      | 18.252        | MM   | 1.1062      | 3662.32007   | 55.18063     | 11.6501 |
| 3      | 29.587        | MM   | 2.0594      | 1.20486e4    | 97.51013     | 38.3273 |
| 4      | 37.639        | MM   | 2.6782      | 1.20340e4    | 74.88902     | 38.2810 |

### 13h (Scheme 2): exo: 92% ee, endo: 90% ee

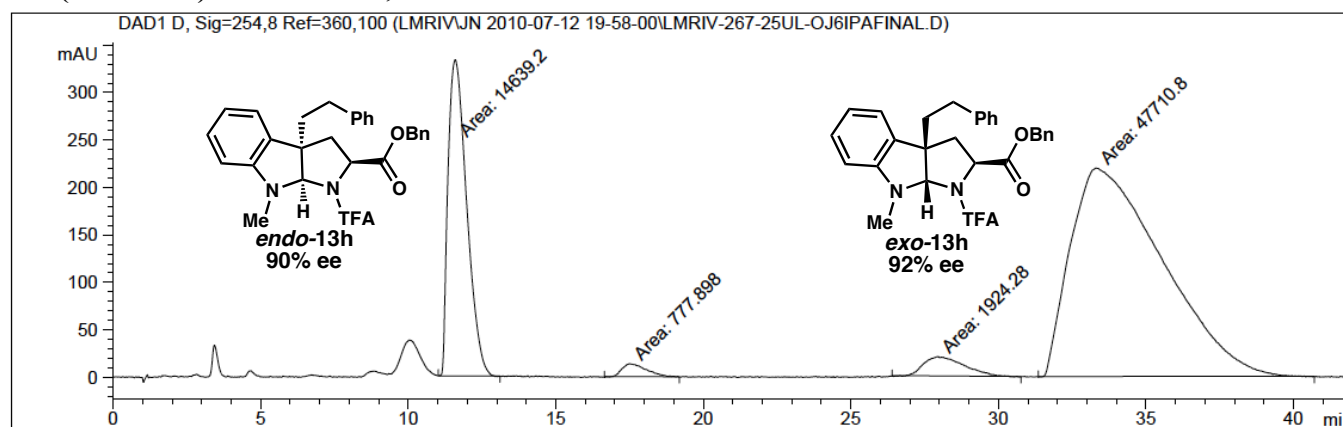

| Peak # | RetTime [min] | Type | Width [min] | Area [mAU*s] | Height [mAU] | Area %  |
|--------|---------------|------|-------------|--------------|--------------|---------|
| 1      | 11.596        | MM   | 0.7322      | 1.46392e4    | 333.24432    | 22.5038 |
| 2      | 17.511        | MM   | 0.9481      | 777.89801    | 13.67496     | 1.1958  |
| 3      | 27.957        | MM   | 1.5821      | 1924.28345   | 20.27142     | 2.9581  |
| 4      | 33.312        | MM   | 3.6201      | 4.77108e4    | 219.65750    | 73.3423 |

### 13i (Scheme 2): racemic

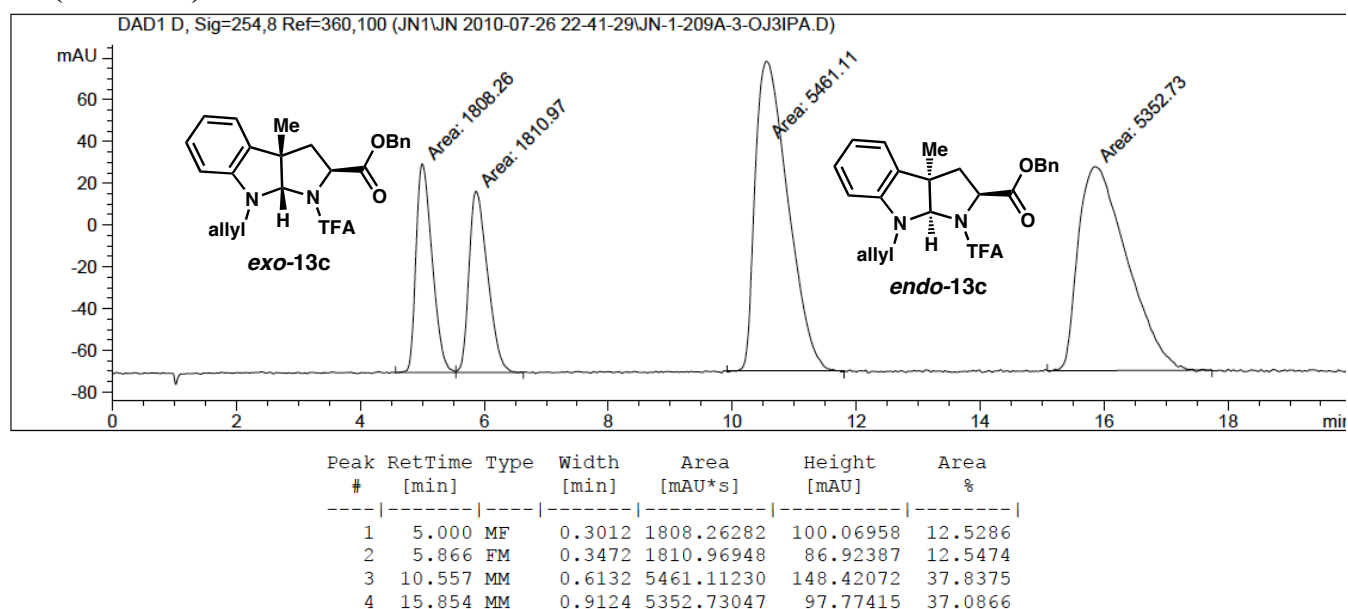

### 13i (Scheme 2): exo: 93% ee, endo: 90% ee

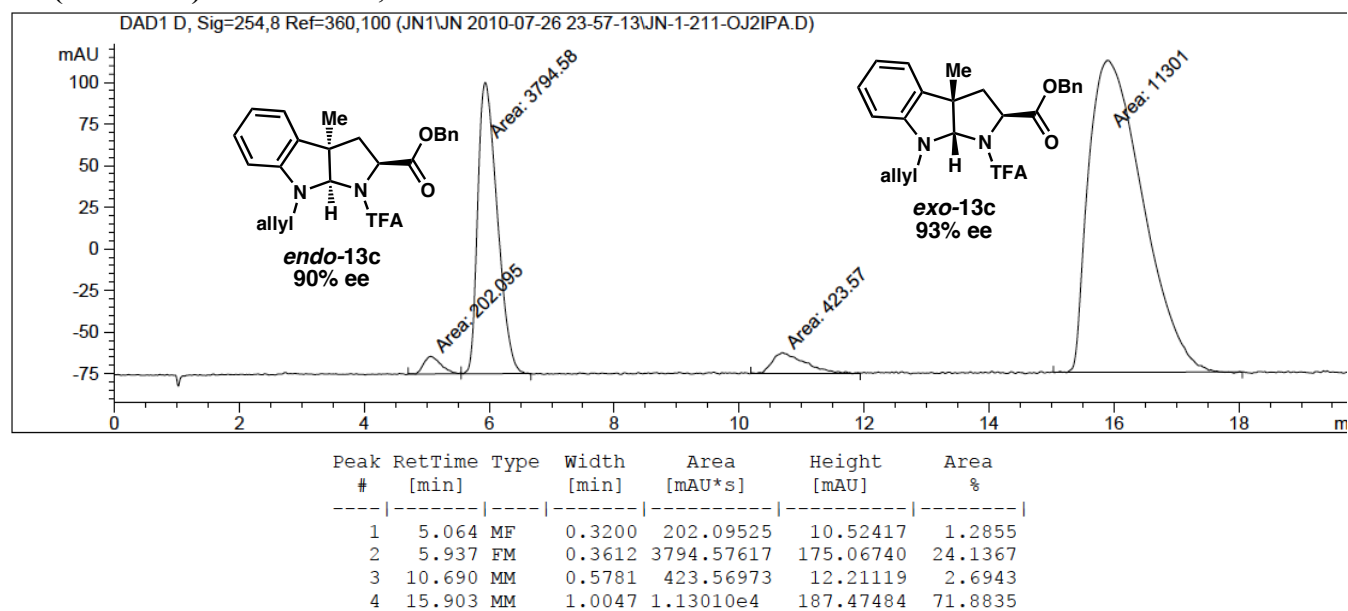

## General Procedure D. Epimerization Studies.

To an NMR tube was added a solution of pyrroloindoline **7d** (0.063 mmol, 1.00 equiv) in CD<sub>2</sub>Cl<sub>2</sub> (0.46 mL), followed by DBU (0.63 mmol, 10.00 equiv). The reaction was monitored by <sup>1</sup>H NMR until the ratio of diastereomers reached an equilibrium. At this point the reaction was diluted with 3 mL CHCl<sub>3</sub> and 25 mL ethyl acetate and washed with saturated NaHCO<sub>3(aq)</sub> (3 x 15 mL). The organic layer was dried (Na<sub>2</sub>SO<sub>4</sub>), filtered, and concentrated to give the mixture of pyrroloindoline diastereomers as a pale yellow oil with quantitative recovery of material.

Experiment 1: Treatment of a 4:1 mixture of *exo-7d* (94% ee) + *endo-7d* (91% ee) with DBU (10 equiv) for 65 h to give >10:1 *ent-endo-7d* (56% ee)

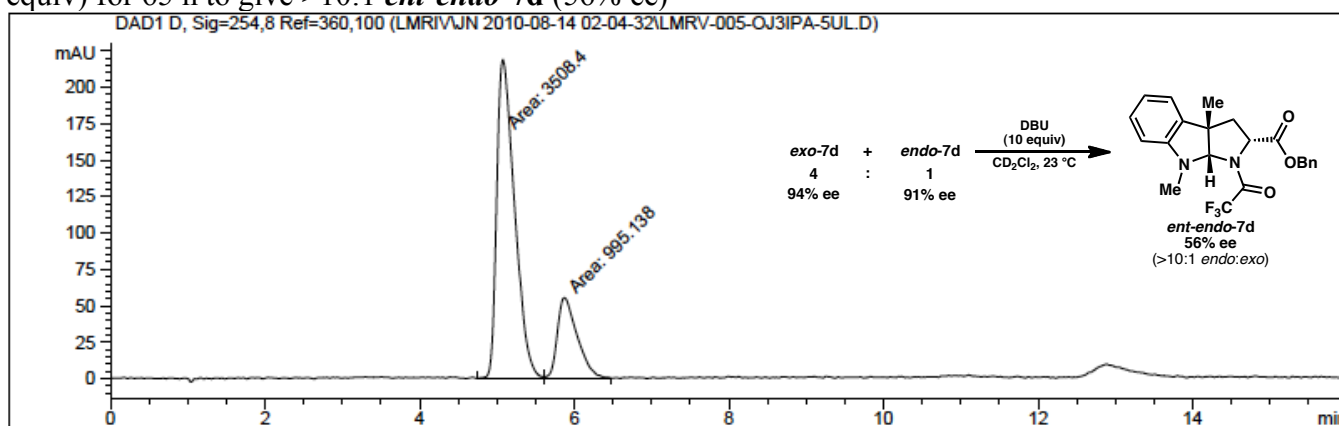

| Peak # | RetTime [min] | Type | Width [min] | Area [mAU*s] | Height [mAU] | Area %  |
|--------|---------------|------|-------------|--------------|--------------|---------|
| 1      | 5.078         | MM   | 0.2670      | 3508.40381   | 218.96385    | 77.9032 |
| 2      | 5.872         | MM   | 0.2984      | 995.13763    | 55.57482     | 22.0968 |

Experiment 2: Treatment of diastereomerically pure *exo-7d* (94% ee) with DBU (10 equiv) for 96 h to give >10:1 *ent-endo-7d* (94% ee).

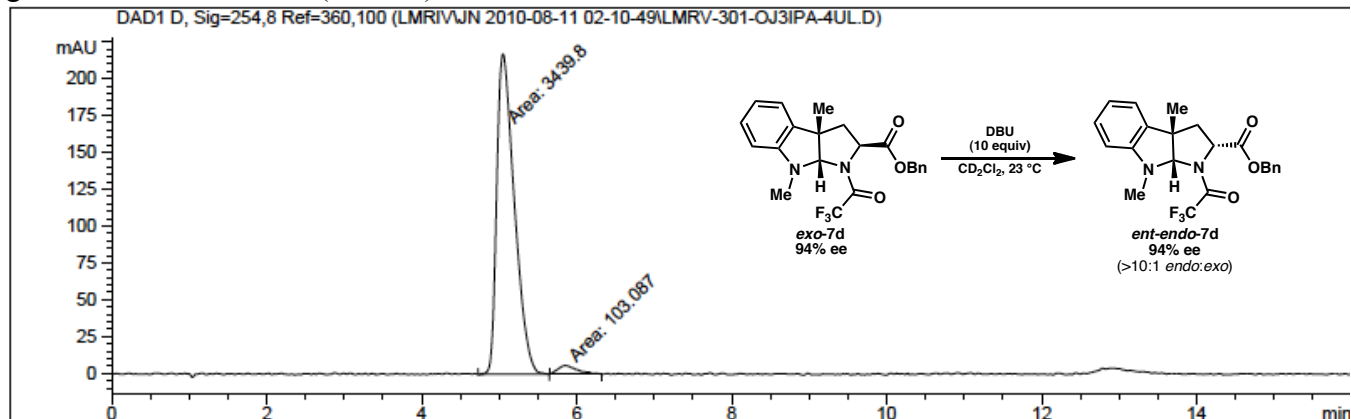

| Peak # | RetTime [min] | Type | Width [min] | Area [mAU*s] | Height [mAU] | Area %  |
|--------|---------------|------|-------------|--------------|--------------|---------|
| 1      | 5.050         | MM   | 0.2637      | 3439.80371   | 217.42592    | 97.0903 |
| 2      | 5.849         | MM   | 0.2887      | 103.08688    | 5.95159      | 2.9097  |

Experiment 3: Treatment of diastereomerically pure *endo-7d* (91% ee) with DBU (10 equiv) for 30 h to return *endo-7d* (89% ee).

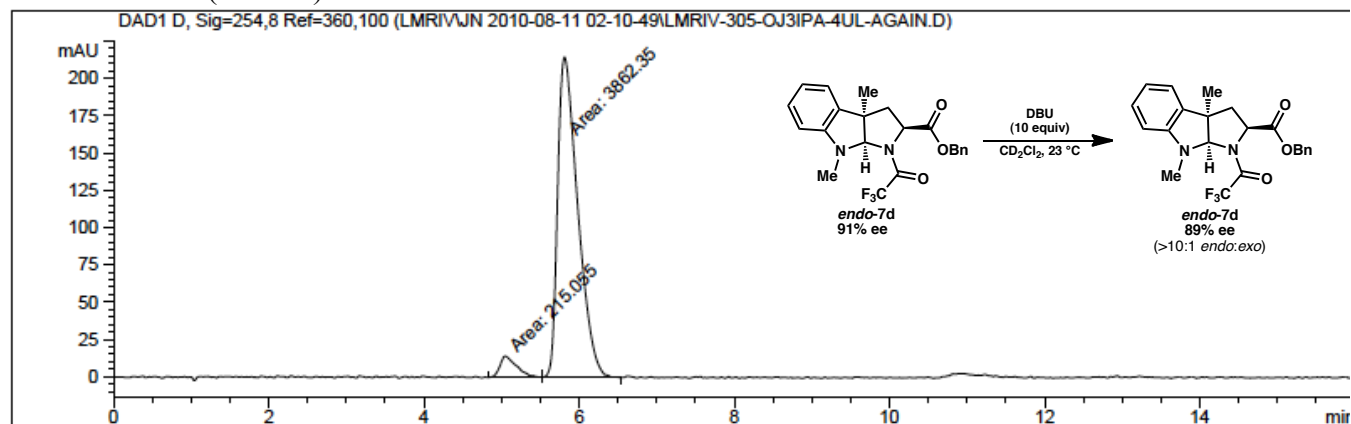

| Peak # | RetTime [min] | Type | Width [min] | Area [mAU*s] | Height [mAU] | Area %  |
|--------|---------------|------|-------------|--------------|--------------|---------|
| 1      | 5.053         | MM   | 0.2501      | 215.05467    | 14.33310     | 5.2743  |
| 2      | 5.814         | MM   | 0.2994      | 3862.34961   | 215.01805    | 94.7257 |

**Procedure E. Resubjection of pure exo and endo pyrroloindolines to reaction conditions.**

To an NMR tube was added a solution of pure pyrroloindoline exo-**7d** (0.073 mmol, 1.00 equiv, 94% ee) in CD<sub>2</sub>Cl<sub>2</sub> (297 μL), followed by (*R*)-BINOL (from a 0.0675 M solution in CD<sub>2</sub>Cl<sub>2</sub>, 0.015 mmol, 0.20 equiv) and SnCl<sub>4</sub> (from a 0.72 M solution in CD<sub>2</sub>Cl<sub>2</sub>, 0.088 mmol, 1.2 equiv). After 4 h at room temperature, the solution was quenched according to general procedure C. The same experiment was performed with pure endo-**7d** (91% ee), except at a concentration of 0.065 M. In both cases, no epimerization or erosion of ee was observed.
